# Supplementary material for: Eliciting symptoms interpreted as normal by patients with early-stage lung cancer: could GP elicitation of normalised symptoms reduce delay in diagnosis? Cross-sectional interview study
Source: PubMed Central journal article supplement — BMJ Open. 2012 Nov 19;2(6):e001977. doi: 10.1136/bmjopen-2012-001977 (PMC3533064; doi:10.1136/bmjopen-2012-001977), 2012-11-19
Supplement: bmjopen-2012-001977.draft_revisions.pdf [file bmjopen-2012-001977.draft_revisions.pdf]

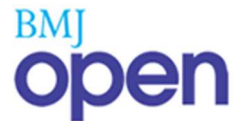

**Eliciting symptoms interpreted as normal by patients with early stage lung cancer – could GP elicitation of normalised symptoms reduce delay in diagnosis?: Cross sectional interview study**

|                                 |                                                                                                                                                                                                                                                                                                                                                 |
|---------------------------------|-------------------------------------------------------------------------------------------------------------------------------------------------------------------------------------------------------------------------------------------------------------------------------------------------------------------------------------------------|
| Journal:                        | <i>BMJ Open</i>                                                                                                                                                                                                                                                                                                                                 |
| Manuscript ID:                  | bmjopen-2012-001977                                                                                                                                                                                                                                                                                                                             |
| Article Type:                   | Research                                                                                                                                                                                                                                                                                                                                        |
| Date Submitted by the Author:   | 19-Aug-2012                                                                                                                                                                                                                                                                                                                                     |
| Complete List of Authors:       | Brindle, Lucy; University of Southampton, Faculty of Health Sciences<br>Pope, Catherine; University of Southampton, Health Sciences<br>Corner, Jessica; University of Southampton, Health Sciences<br>Leydon, Geraldine; University of Southampton, Faculty of Medicine<br>Banerjee, Anindo; Southampton General Hospital, Respiratory Medicine |
| <b>Primary Subject Heading</b>: | Qualitative research                                                                                                                                                                                                                                                                                                                            |
| Secondary Subject Heading:      | Patient-centred medicine, General practice / Family practice                                                                                                                                                                                                                                                                                    |
| Keywords:                       | Symptoms, Early cancer diagnosis, Terminology as topic, Help seeking, Lung cancer, Discourse Analysis                                                                                                                                                                                                                                           |
|                                 |                                                                                                                                                                                                                                                                                                                                                 |

SCHOLARONE™  
Manuscripts

1  
2  
3 **Eliciting symptoms interpreted as normal by patients with early stage lung cancer – could**  
4 **GP elicitation of normalised symptoms reduce delay in diagnosis?: Cross sectional**  
5 **interview study**  
6

7 Lucy Brindle, Catherine Pope, Jessica Corner, Geraldine Leydon, Anindo Banerjee  
8

9 Faculty of Health Sciences, University of Southampton, Building 67, University Road,  
10 Southampton, SO17 1BJ. Phone: 02380 598526; Fax: 02380 597820. Lucy Brindle, Improving  
11 Earlier Diagnosis Research Group Lead.

12 Faculty of Health Sciences, University of Southampton, Building 67, University Road,  
13 Southampton, SO17 1BJ. Catherine Pope, Professor of Medical Sociology.

14 Faculty of Health Sciences, University of Southampton, Building 67, University Road,  
15 Southampton, SO17 1BJ. Jessica Corner, Head of Faculty of Health Sciences.

16 Department of Primary Medical Care, University of Southampton, Aldermoor Health Centre,  
17 Aldermoor Close, Southampton, SO16 5ST. Geraldine Leydon, Principal Research Fellow.

18 Southampton General Hospital, Coxford Road, Southampton, SO16 6YD, Anindo Banerjee,  
19 Lead Chest Physician.  
20  
21  
22

23 Correspondence to Lucy Brindle – [l.a.brindle@soton.ac.uk](mailto:l.a.brindle@soton.ac.uk)

24 Building 67, University Road, Southampton, SO17 1BJ. Phone: 02380 598526; Fax: 02380  
25 597820.  
26  
27  
28  
29

30 **Words**

31 Abstract: 247

32 Article: 3812  
33  
34  
35  
36  
37  
38  
39  
40  
41  
42  
43  
44  
45  
46  
47  
48  
49  
50  
51  
52  
53  
54  
55  
56  
57  
58  
59  
60

## ABSTRACT

**Objectives:** To investigate why symptoms indicative of early-stage lung cancer (LC) were not presented to GPs and how early symptoms might be better elicited within primary care.

**Design, setting and participants:** A qualitative cross-sectional interview study about symptoms and help-seeking in 20 patients from 3 south England counties, awaiting resection of LC (suspected or histologically confirmed). Analysis drew on principles of discourse analysis and constant comparison to identify processes involved in interpretation and communication about symptoms, and explain non-presentation.

**Results:** Most participants experienced health changes possibly indicative of LC which had not been presented during GP consultations. Symptoms that were episodic, or potentially caused by ageing or lifestyle, were frequently not presented to GPs. In interviews, open questions about health changes/symptoms in general did not elicit these symptoms; they only emerged in response to closed questions detailing specific changes in health. Questions using disease-related labels, e.g. pain or breathlessness, were less likely to elicit symptoms than questions that used non-disease terminology, such as aches, discomfort or 'getting out of breath'. Most participants described themselves as feeling well and were reluctant to associate potentially explained, non-specific or episodic symptoms with LC, even after diagnosis.

**Conclusion:** Patients with early LC are unlikely to present symptoms possibly indicative of LC that they associate with normal processes, when attending primary care before diagnosis. Faced with patients at high LC risk, GPs will need to actively elicit potential LC symptoms not presented by the patient. Closed questions using non-disease terminology might better elicit normalised symptoms.

## ARTICLE SUMMARY

## Article focus:

- Why are symptoms potentially indicative of lung cancer not presented to GPs?
- How and why are some lung cancer symptoms normalised by lung cancer patients?
- What can a discourse analytic study of communication about symptoms tell us about cultural and communication factors involved in the non-presentation and normalisation of symptoms, and how symptoms might be better elicited in primary care?

## Key messages:

- Non-specific, episodic and non-progressive symptoms were normalised by patients with operable lung cancer who felt well.
- Symptoms normalised by patients with operable lung cancer were not presented to GPs during consultations before diagnosis. GP elicitation of normalised symptoms would lead to better informed referral decisions.
- Closed questions using non-disease terminology were more effective at eliciting symptoms normalised by patients.

## Strengths and limitations of this study:

- This study used interviews to identify interactional factors which influenced symptom presentation within a research study, and it may be that symptom presentation occurs differently within everyday GP consultations; nonetheless our findings indicate that the symptoms normalised by patients within interviews were also the symptoms that consulting patients did not present to GPs. If these normalised symptoms were elicited by GPs, referral decisions would be better informed.
- The majority of lung cancer patients are diagnosed with inoperable disease and so any sample of patients diagnosed with operable lung cancer is necessarily unrepresentative of the whole population of lung cancer patients. However, research involving operable patients enables the investigation of communication about currently experienced early symptoms, rather than relying on retrospective accounts of early symptoms provided by patients with later stage disease. Furthermore, the reasons these patients with lung cancer give for non-presentation of symptoms concur with other studies of help-seeking for cancer symptoms,[19] supporting the transferability of our findings.

**What is already known:**

Despite visiting the GP more frequently than randomly selected controls in the year before diagnosis, most lung cancer patients are diagnosed too late (when potentially curative treatment is no longer possible).

Retrospective interview studies indicate that symptoms experienced months to years before diagnosis are often 'normalised' by those with lung cancer; symptoms are often interpreted as not serious, or as not requiring medical investigation.

**What this study adds:**

Patients being investigated for operable lung cancer who felt well normalised many non-specific and episodic symptoms potentially indicative of lung cancer; consulting patients were unlikely to present normalised symptoms to GPs.

Closed questions using non-disease related terminology elicited symptoms interpreted as normal by patients. More effective elicitation of non-specific and episodic symptoms in those at high risk of lung cancer might improve earlier diagnosis in this group.

## Eliciting symptoms interpreted as normal by patients with early stage lung cancer – can we use closed questions to reduce delay in diagnosis?

### INTRODUCTION

Lung cancer is diagnosed too late in the UK and survival rates are lower than in most other Western European countries;[1-4] 86% are diagnosed at a stage when curative treatment is not possible and less than 25% survive one year following diagnosis.[5-6] Lung cancer kills approximately 30,000 people a year in the UK so even modest improvements in the time to diagnosis could dramatically improve health outcomes.[7] Despite successful national cancer screening programmes, most tumours are diagnosed following presentation with symptoms [8] so it is vital to identify patients with significant symptoms early. The UK National Institute of Clinical Excellence (NICE) recommends urgent chest x-ray for patients presenting with any 1 of 10 unexplained or persistent symptoms [9] but General Practitioners (GPs) have to balance risks associated with unnecessary x-ray against possible late diagnosis, and make judgements about the relative validity of alternative explanations for symptoms. This is further complicated by the fact that lung cancer is often preceded by chronic respiratory disease [10] making detection difficult.

Recent evidence [11] indicates that most newly diagnosed lung cancer patients do not recognise all of their cancer symptoms. Isolated single symptoms have low predictive value for lung cancer [12] but patients seldom present multiple symptoms to GPs. [13-14] Interview research has shown that lung cancer patients normalise symptoms and delay seeking help [15-16] and in the general population many symptoms are never presented to GPs [17-18]. However, patients diagnosed with lung cancer have been shown to report symptoms to their GP more frequently than controls 6-24 months before diagnosis [12] but it seems that a combination of cultural and communication processes combine, sometimes fatally, to prevent help-seeking [13,19-20] for the full range of symptoms experienced by patients at increased risk of lung cancer (LC).[11;21]

Previous studies have identified symptom normalisation - the association of symptoms with normal processes - as an important factor in delayed LC diagnosis. However, research has not yet addressed the reasons for normalisation of LC symptoms, or investigated how normalised symptoms that are not presented to health care professionals might be better elicited. Structured interviewing has been used in primary care to improve psychiatric diagnosis but it is not clear if it could help to elicit early lung cancer symptoms. Our study examined how symptoms were normalised by patients and compared structured and unstructured elicitation of symptoms. By using a discourse analytic approach we were able to suggest ways that health care professionals might better elicit normalised symptoms, and investigate why they are not presented to GPs.

### METHODS

#### Design

Previous studies have focused on inoperable lung cancer, but we were interested in how patients communicated early symptoms so we conducted interviews with patients awaiting surgical resection of lung cancer (suspected or histologically confirmed). Previous interview studies with lung cancer patients have relied upon retrospective accounts of early symptoms experienced before diagnosis. In contrast, we were interested in how patients communicate about, and negotiate the relevance of current early symptoms. In retrospective accounts patients might normalise symptoms to justify delays in seeking help so we also investigated the normalisation of symptoms that started following LC investigation. We used unstructured

1  
2  
3 followed by structured interviewing to find out if this could elicit symptoms more effectively  
4 than open questions about changes in health, which have been found not to elicit all lung  
5 cancer symptoms (see Smith et al, 2009).  
6

### 7 8 **Participants**

9 The interview sample for this study was drawn from 28 adult patients with a diagnosis of, or  
10 suspected of having, operable lung cancer (probable: >90% or histologically confirmed)  
11 recruited to a questionnaire development study. Patients were either approached by the  
12 researcher following their first consultation with participating thoracic surgeons at a South  
13 England Trust, or were sent a letter and information sheet by the surgical team. Seventeen  
14 out of twenty consecutive patients within 3 recruitment periods (07/2006-10/2007; 02/2008-  
15 05/2008; 02/2009-05/2009) approached by a researcher agreed to take part. An opportunistic  
16 sample of 11 participants was recruited by letter (within the three recruitment periods).  
17 Twenty eight patients in total were recruited and interviewed about their current and recent  
18 health and help-seeking behaviour.  
19

20  
21 This paper reports the analysis of 20 interviews with patients identified as having operable  
22 lung cancer at the end of the study period (data from seven interviewees who received a non-  
23 malignant diagnosis after the interview were analysed separately and are not reported here.  
24 One patient diagnosed with advanced disease was also excluded). Characteristics of these 20  
25 patients are given in Table 1.  
26

27 [Insert table 1 here]  
28

### 29 30 **Interviews**

31 The unstructured (first) section of the interview used open questions to generate narrative  
32 accounts of participants' experiences and changes in health status (See Appendix 1 for the  
33 interview checklist). Participants were asked to describe anything at all that they had noticed  
34 about their health, even if they thought it not relevant to their investigation for lung cancer.  
35 The second part of the interview was semi-structured and focused on duration and  
36 characteristics of symptoms, and reasons for seeking or not seeking help. The third part of the  
37 interview used closed questions to explore symptoms and help-seeking using a list of  
38 potential lung cancer symptoms compiled from Cancer Research UK [6] information, NICE  
39 [9] guidelines, and a previous interview study with lung cancer patients.[15] Field notes were  
40 recorded after the interview. Interviews lasted between 1-2 hours, took place in the  
41 participants' home (18/20) or a hospital setting (2), some involved the participant's partner  
42 (2) or carer (1), all were audio-recorded, transcribed verbatim, checked for accuracy and  
43 anonymised. An adapted version of Jefferson's transcription conventions [22] were used  
44 (described in Box 1).  
45  
46

47 [Insert Box 1 here]  
48

### 49 50 **Analysis**

51 The first stage of analysis involved an iterative coding process using elements of the constant  
52 comparative method to develop themes (initially identified by LB and checked by a second  
53 researcher, GL, who independently read a sample of transcripts and verified codes and  
54 themes). This iterative process continued until data saturation was achieved. All transcripts  
55 were revisited and deviant cases were sought.[23] Discourse analysis[24-25] which considers  
56 language use in context, was used to examine the interview accounts, and to explore how  
57  
58  
59  
60

1  
2  
3 health changes were presented in patient-interviewer interactions. We combined thematic  
4 analysis with discourse analysis to explain normalisation and non-presentation of symptoms.  
5

6 The Results section presents key findings about symptom presentation, including reasons for  
7 non-presentation, and examines the impact of closed questions. Two types of symptom  
8 accounts were identified: 'symptoms as normal processes' and 'symptoms of  
9 disease/concern'. The first results section – 'Reasons for non-presentation' – describes the  
10 main features of 'symptoms as normal processes' accounts (episodic/non-progressive  
11 symptoms or ageing and lifestyle related explanations), and exceptions to the normalisation  
12 of symptoms. The distribution of the two types of symptom accounts (and non-presentation)  
13 by symptom, route to diagnosis and declining health/feeling unwell, are described in table 3.  
14 The second results section examines the use of closed questions to elicit normalised accounts  
15 and the implications of symptom terminology. Examples of the two types of symptom  
16 account and their elicitation are provided in table 4.  
17  
18

## 19 RESULTS

20 Most participants described themselves as having good health; only four presented accounts  
21 of declining health preceding diagnosis, characterised by multiple symptoms and feeling  
22 unwell (see table 2).  
23

24 [Insert table 2 here]  
25

26  
27 Symptomatic diagnosis occurred for 13 participants and 7 participants claimed not to have  
28 any lung cancer symptoms, describing incidental diagnoses made during the investigation of  
29 unrelated health problems, traumatic injury or screening (Table 3).  
30

31 [Insert link to table 3 here]  
32

33  
34 15 participants described further changes in health possibly indicative of lung cancer  
35 (according to NICE Guidelines/CRUK symptom list) that were not thought a reason for  
36 concern and had not been presented to their GP, despite the presentation of the trigger  
37 symptom or use of primary care services for other reasons (Table 3). They did not associate  
38 these un-investigated health changes with LC and they were elicited by closed questions  
39 about specific symptoms, but not by open questions about symptoms or changes in health.  
40

### 41 Reasons for non-presentation

42 Normal processes such as lifestyle and ageing were commonly used as explanations for not  
43 presenting symptoms to GPs. For example, breathlessness was frequently associated with  
44 being unfit, getting older, over-activity or seasonal changes rather than lung cancer:  
45

46  
47 P18: I just put it down to me being too unfit for that particular run or circuit or down to age...I didn't  
48 associate that with anything other than me being old or unfit, one of those.  
49

50 In these 'symptoms as normal process' accounts patients portrayed symptoms as part of  
51 everyday life processes and avoided claiming cancer causation:  
52

53 LB: ...do you get any discomfort anywhere, do you have any aches or pains?

54 P11: No (.) only round me neck but that's just recently it's come on. I don't know whether it's to  
55 do with this problem I've got ... I think it's a bit of arthritis there. And (.) you know (.) it's old  
56 age really I mean, because we do get these things I know, as you get older, (.) but just as I say  
57 this last couple of weeks it's got really really bad.  
58  
59  
60



Some of those who described current ‘good health’ at odds with their diagnosis, also described episodic ill health, or long term symptoms which had led to lifestyle changes and adaptation. Symptoms like breathlessness or cough might be more severe during a chest infection, but were not commented on if they persisted. Here, P25 did not mention breathlessness on climbing the stairs to her GP:

P25: It was getting the pains in my hands and my wrists... It was when it started here [in wrists], it started to hinder me with things...but I wasn't going [to the GP] through breathlessness ...because that had finished when I got better... You know within the week I was back to being able to breathe again. Apart from when I you know whether you get out of breath carrying the Hoover upstairs... [Husband] says “What have you been doing? [ ]?” and I just say “Nothing just those stairs”.

The ability to improve did not appear to fit with the expected progressive pattern for a disease such as lung cancer:

P25: [ ]...once I've had my antibiotics or a bit of an inhaler I'm fine again, like I am now... Why don't I feel really, really ill now to understand this? How can you have this and get better and feel better, get ill but then you get better, well how can you do that?

These normalised accounts, by simultaneously presenting alternative non-disease explanations, such as ageing, for health changes, also helped construct the participant as healthy. Exceptions to the use of normalised accounts for un-investigated symptoms were found in four interviews where patients had declining health (consisting of multiple symptoms and feeling unwell); two of these four patients also provided ‘quest for diagnosis narratives’ in which they had battled, or were still battling, for a diagnosis in the face of clinical ignorance or clinical delay. In the interviews they described most of their health changes in response to open questions (Table 3: Exceptions to the normalisation of symptoms), including symptoms not presented to GPs, and did not normalise these symptoms. Even symptoms presented in response to closed questions were most often not normalised:

LB: So have you noticed any changes in breathing or breathlessness?

P19: Yes I am definitely more breathless now... I am not normally that breathless!

LB: ...and before that, how would you describe your breathlessness?

P19: Well it's never been really too bad, as long as I've had my inhalers... So it's just recently that I am beginning to get a bit more breathless and I don't think that's associated with the asthma.

Participants who presented themselves as well, normalised non-specific, non-progressive and episodic symptoms. Examples of ‘symptoms as normal processes’ accounts and ‘symptoms of disease/concern’ accounts are provided in Table 4.

[Insert table 4 here]

### Using closed questions to elicit symptoms not elicited by open questions

Symptoms interpreted as normal by participants tended not to be described in response to open interview questions (Tables 3 & 4) and were not presented to GPs. For example, P22, who had been investigated by his GP for a bowel disorder in the weeks before diagnosis, described an absence of symptoms he associated with lung cancer:

P22: No as I say this was a complete shock to find out that it was on the lung. As I said, we would never have known anything about it if I hadn't fallen off that thing. I suppose it would eventually with

finding this I suppose I could have lost weight or gone awful thing one to the doctor “well we’ll have to find out what’s causing it” but no nothing.

However when asked specifically about long-term cough, he revealed he had experienced a cough for 4-5 months:

P22: Well I’ve got a cough now. Every now and again I cough and get a little phlegm up.  
 LB:... And is it something that you ever went to your doctor about?  
 P22: No.  
 LB: No.  
 P22: No I’ve never had to do that.

Accounts produced in response to closed interview questions about specific symptoms displayed two common structures for symptom reporting: ‘Affirmation/Normalisation’ and ‘Delayed Affirmation/Normalisation’. The symptom referred to by the interviewer might either be affirmed but normalised (‘Affirmation/Normalisation’) or initially denied and then normalised (‘Delayed Affirmation/Normalisation’). When closed questions phrased health changes in ways which did not necessarily indicate disease, the participant was more likely to answer affirmatively, or describe a health change, but then suggest the symptom was normal and not related to lung cancer (Affirmation/Normalisation). In contrast, questions using disease-related terms - e.g. ‘pain’ - produced an immediate denial or pause (non-response) followed by normalisation (Delayed Affirmation/Normalisation):

LB: ... have you had any chest pain at all that you can describe?  
 P12: No, not really. I mean as the cough’s got shall we say more persistent and sort of shall we say worse yes (.) I can feel it a bit (.) but I mean I can’t feel it now... if you look at the x-rays you think ‘oh blimey!’ but you wouldn’t know it was there!

Reformulation of the question, involving a shift from disease to non-disease terminology, could elicit normalised accounts of symptoms – as in these examples where a change in terminology shifting from ‘pain’ to ‘aches’ and ‘discomfort’, and shifting from ‘breathlessness’ to ‘not being able to get your breath’ leads to elicitation of the symptoms:

LR: Have you had any pain anywhere?  
 P16: None at all. No  
 LR: ...have you experienced any sort of aches or general sort of discomfort at all? ...  
 P16: No, not serious no. Well ...sometimes I have a feeling that something’s going on, but it’s not there all the time, you know  
 LR: And have you experienced breathlessness? ((pause))  
 P18: ((intake of breath))  
 LR: Just feeling like you haven’t been able to get your breath quite so easily?  
 P18: I would go up a couple of flights of stairs quite randomly, I would feel out of breath. I would never never usually be like that, so yes, for a fit guy I would go ooh I’m breathless ...but then you know I shouldn’t have really bothered about it at all. But then again I have put on a slight bit of weight haven’t I?

In contrast with disease-related terminology, terminology not strongly associated with disease such as ‘aches’ or ‘discomfort’ rather than ‘pain’, produced affirmation and then normalisation (affirmation/normalisation):

LB: And have you had any kind of aches or discomforts anywhere?  
 P12: Well I have been complaining about a stiff neck haven’t I...and also this shoulder...but I mean I can play golf, so it’s not that bad!

1  
2  
3  
4 Similarly the use of terms that imply 'breathing changes' or 'getting out of breath more  
5 easily', rather than 'breathlessness', produced an affirmation/normalisation response  
6 structure:  
7

- 8 LB: ...what about breathing changes, or have you ever noticed at all that you can become more  
9 breathless than you would have done say a few years ago when you were doing something?  
10 P11: I do now. This past (.) oh couple of months I suppose. I get more breathless if I (.) if I hurry  
11 around too much you know...but normally you know, I don't run around! (LB: no no) If I  
12 remember my age... I don't sort of get out of (.) breathless or anything like that, it's only if I'm  
13 (.) ... overdo things really.  
14

15 Even though closed questions using disease-related terminology might elicit previously  
16 unmentioned health changes, closed questions using non-disease terminology did so more  
17 effectively.  
18

## 19 DISCUSSION

### 20 Eliciting 'hidden' symptoms

21 Most of our sample described themselves as feeling well, despite going on to have a  
22 diagnosis of operable lung cancer. Patients who felt well had experienced a range of health  
23 changes indicative of lung cancer but they did not tell their GPs about many of these, despite  
24 making use of primary care services. Instead they framed these symptoms as normal features  
25 of lifestyle and ageing processes.  
26  
27

28 Delay in lung cancer diagnosis in the UK has been blamed upon patients' failure to recognise  
29 early symptoms.[26] However, our research indicates that normalised symptoms can be  
30 elicited by closed questions. This runs counter to current educational and communication  
31 practice which encourages open and expansive questioning. Whereas open questioning is  
32 necessary to elicit symptoms perceived as abnormal by the patient, normalised symptoms will  
33 remain hidden. Once elicited by closed questions, normalised symptoms are often quickly  
34 obscured within accounts which provide every day explanations for health changes. This  
35 means that interviewers (or health professionals) have to probe normalised accounts to  
36 uncover hidden symptoms.  
37  
38

39 Questions using disease-related symptom terminology, such as 'chest pain', or  
40 'breathlessness', appeared to have limited potential to elicit potential lung cancer symptoms  
41 experienced by those with operable lung cancer. Our analysis suggests that to get at these  
42 symptoms we need to ask closed questions without referencing disease-related symptom  
43 labels. Again this runs counter to some guidance such as the NICE referral criteria  
44 terminology which uses disease-related terms. Furthermore, contextual factors and framing of  
45 the patient's presentation are known to influence GPs' diagnostic reasoning;[27] patients who  
46 present themselves as well and without declining health might be less likely raise concern and  
47 be referred for investigation of potential cancer symptoms.  
48  
49

50 Recent survey research looking at public awareness of cancer symptoms in the UK,  
51 concluded that levels of knowledge are low for many potential cancer symptoms.[28] These  
52 findings have informed regional NAEDI (National Awareness and Early Diagnosis  
53 Initiatives) [29] materials designed to educate the public about cancer symptoms. Our work  
54 suggests that lists of symptoms alone are unlikely to prompt patients to reveal multiple non-  
55 specific and normalised symptoms, especially when they are asked to give unstructured  
56 accounts. Furthermore, our research indicates that lung cancer risk scores provided by  
57  
58  
59  
60

1  
2  
3 symptom based clinical decision support aids (e.g. RATS[30]), are likely to be influenced by  
4 how symptoms are elicited within the consultation.  
5

6 Patient-centred medicine attempts to honour patients' experiences and concerns – presented  
7 in their own terms. It has been accompanied by more open consultation styles and a shift  
8 away from interactions directed by the health professional. For patients with potential lung  
9 cancer this may not be the best way to elicit symptoms. Instead routine medical consultations  
10 involving those at increased cancer risk [31] might better be restructured to enable the  
11 presentation of health changes which appear normal or unproblematic to the patient. This  
12 would require the clinician to be aware of the risk of lung cancer in all patients presenting to  
13 their service with symptoms seemingly unrelated to lung cancer. The elicitation of  
14 normalised symptoms in patients at increased lung cancer risk might then facilitate GPs'  
15 chest x-ray referral decisions.  
16  
17

### 18 **Strengths and Limitations**

19 This study used interviews to identify interactional factors which influenced symptom  
20 presentation within a research study. The systematic and in-depth study of language of the  
21 type reported in this article can lead to critical insights about conventions used in  
22 conversation that are transferable between settings.[32] However, it may be that symptom  
23 presentation occurs differently within everyday GP consultations; closed questions involving  
24 non-disease terminology might not be as effective at eliciting normalised symptoms within  
25 primary care practice. Further research involving GP consultations will be required to  
26 establish how effective these methods of symptom elicitation are within primary care.  
27 Nonetheless our findings indicate that the symptoms normalised by patients within interviews  
28 were also the symptoms that consulting patients did not present to GPs. If these normalised  
29 symptoms that are potentially indicative of LC were elicited by GPs, referral decisions would  
30 be better informed.  
31  
32  
33

34 The participant group were patients with an established or probable lung cancer diagnosis.  
35 This may influence symptom presentation in the interview as a LC diagnosis is already  
36 suspected. However, the normalisation of symptoms that started after diagnosis within this  
37 study suggests that normalisation is not justifying delays in diagnosis; the association of  
38 episodic, non-specific symptoms with normal processes appears commonplace for those  
39 feeling well, even when lung cancer provides a potential explanation for symptoms.  
40  
41

42 NICE referrals guidelines are based upon a weak evidence base; therefore, we do not know  
43 the likelihood that the symptoms not presented to GPs were caused by LC. However, these  
44 guidelines represent the best evidence currently available to inform referral for lung cancer  
45 investigation. If these non-specific symptoms experienced by patients at increased lung  
46 cancer risk were elicited in primary care, GPs would be better able to operationalize NICE  
47 guidelines. A prospective study may eventually determine the utility of these symptoms in the  
48 early diagnosis of lung cancer and the efficacy of treatment (including surgery).  
49  
50

51 The majority of lung cancer patients are diagnosed with inoperable disease and so any sample  
52 of patients diagnosed with operable lung cancer is necessarily unrepresentative of the whole  
53 population of lung cancer patients. It may be that our participants were more symptomatic in  
54 the early stages, or more likely to seek medical help, than those diagnosed with inoperable  
55 disease. However, this makes it all the more compelling that these participants still  
56 experienced a number of symptoms that they did not report. The reasons these patients with  
57 lung cancer give for non-presentation of symptoms concur with other studies of help-seeking  
58  
59  
60

1  
2  
3 for cancer symptoms,[19] supporting the transferability of our findings. Furthermore, our  
4 finding that those who reported good health tended to normalise nonspecific, episodic and  
5 non-progressive symptoms might have implications for improving earlier detection of other  
6 cancers where patients describe good health in the early stages, and for patient-clinician  
7 communication more generally.  
8

### 9 **Conclusions**

10 Even though lung cancer patients are more likely to attend their GP with potential symptoms  
11 in the year before diagnosis than healthy controls, our findings indicate that many non-  
12 specific symptoms are not presented within these consultations. The use of non-disease  
13 related symptom labels in combination with some closed questioning appears to improve  
14 symptom elicitation.  
15

16  
17 Eliciting and investigating normalised symptoms – to uncover the invisible part of the illness  
18 iceberg,[16-17] whilst not feasible for all patients attending primary care, would be possible  
19 for those identified as at increased lung cancer risk.[31]  
20  
21

22  
23 **Ethical approval:** NHS ethical approval was gained from Southampton South Central  
24 Research Ethics Committee (05/Q1702/46).  
25

26 **Authorship:** All authors have commented on the first and final draft of the paper, and  
27 contributed to interpretation of the data. LB designed the study, conducted interviews,  
28 provided the discourse analytic expertise that informed data analysis, analysed data, and  
29 produced all drafts. CP also commented on the penultimate draft of the paper and edited the  
30 final draft. GL contributed to coding of the interview transcripts. AB also contributed to data  
31 collection. LB is the guarantor for the study.  
32  
33

34  
35 **Licence:** The Corresponding Author has the right to grant on behalf of all authors and does  
36 grant on behalf of all authors, a worldwide licence to the Publishers and its licensees in  
37 perpetuity, in all forms, formats and media (whether known now or created in the future), to  
38 i) publish, reproduce, distribute, display and store the Contribution, ii) translate the  
39 Contribution into other languages, create adaptations, reprints, include within collections and  
40 create summaries, extracts and/or, abstracts of the Contribution, iii) create any other  
41 derivative work(s) based on the Contribution, iv) to exploit all subsidiary rights in the  
42 Contribution, v) the inclusion of electronic links from the Contribution to third party material  
43 where-ever it may be located; and, vi) licence any third party to do any or all of the above.  
44  
45  
46

47 **Access to data:** All authors had access to the data and can take responsibility for the integrity  
48 of the data and the accuracy of the data analysis.  
49

50 **Competing interest declaration:** "All authors have completed the Unified Competing  
51 Interest form at [www.icmje.org/doi\\_disclosure.pdf](http://www.icmje.org/doi_disclosure.pdf) (available on request from the  
52 corresponding author) and declare: LB had support from Research Councils UK for the  
53 submitted work; no financial relationships with any organisations that might have an interest  
54 in the submitted work in the previous 3 years; no other relationships or activities that could  
55 appear to have influenced the submitted work."  
56  
57  
58  
59  
60

1  
2  
3 **Contributions:** Liz Roffe conducted some interviews. The structured section of the  
4 interview was based upon an interview schedule developed by Corner, Hopkinson,  
5 Fitzsimmons et al. (2005).  
6

7  
8 **Data Sharing:** Research participants have not given informed consent for data sharing; a  
9 complete qualitative data set cannot be anonymised adequately.  
10

11 **Funding:** This research was funded by an RCUK (Research Councils UK) Post-Doctoral  
12 Fellowship awarded to Lucy Brindle to develop research to improve earlier lung cancer  
13 diagnosis (sponsor: Faculty of Health Sciences, University of Southampton - Jessica Corner).  
14

15 **Independence:** The funders (RCUK) had no influence on the design, conduct or reporting of  
16 this research.  
17  
18  
19

## 20 21 REFERENCES

22  
23 1 Laroche, C, Wells F, Coulden R, Stewart S, Goddard M, Lowry E, Price A, Gilligan D.  
24 Improving surgical resection rate in lung cancer. *Thorax* 1998;**53**:445-449.  
25  
26

27  
28 2 Coleman MP, Gatta G, Verdecchia A, Estève J, Sant M, Storm H, Allemani C, Ciccolallo  
29 L, Santaquilani M, Berrino F. EUROCORE-3 summary: cancer survival in Europe at the end  
30 of the 20th century. *Annals of Oncology* 2003; **14**(S5): v128-149.  
31  
32  
33

34  
35 3 Richards M. EUROCORE-4 studies bring new data on cancer survival. *Lancet Oncol*  
36 2007;**8**:752-753.  
37  
38

39  
40 4 Imperatori A, Harrison RN, Leitch DN, Rovera F, Lepore G, Dionigi G, Sutton P,  
41 Dominioni L. Lung cancer in Teesside (UK) and Varese (Italy): a comparison of management  
42 and survival. *Thorax* 2006;**61**:232-239.  
43  
44  
45  
46  
47

48  
49 5 ONS. Bulletin: Cancer Survival in England, 2005-2009 and followed up to 2010. 26<sup>th</sup> April  
50 2012. [http://www.ons.gov.uk/ons/rel/cancer-unit/cancer-survival-rates/2005-2009-followed-](http://www.ons.gov.uk/ons/rel/cancer-unit/cancer-survival-rates/2005-2009-followed-up-to-2010/)  
51 [up-to-2010/](http://www.ons.gov.uk/ons/rel/cancer-unit/cancer-survival-rates/2005-2009-followed-up-to-2010/) (accessed Aug 2012).  
52  
53  
54  
55  
56  
57  
58  
59  
60

1  
2  
3 6 Cancer Research UK. Cancer Help UK. Information service about cancer and cancer care.  
4  
5 www.cancerhelp.org.uk/help/default.asp?page=2964 (accessed Aug 2012).  
6  
7

8  
9 7 Richards MA. The size of the prize for earlier diagnosis of cancer in England. *Br J Cancer*  
10  
11 2009;**101** (Suppl 2):S125-9.  
12

13  
14 8 Hamilton W, Peters TJ. *Cancer Diagnosis in Primary Care*. Oxford: Churchill Livingstone,  
15  
16 2007: 1-200.  
17

18  
19  
20 9 National Institute for Health and Clinical Excellence. The diagnosis and treatment of lung  
21  
22 cancer (update). (Clinical Guideline 121) 2011. <http://guidance.nice.org.uk/CG121>.  
23

24  
25 10 Young RP, Hopkins RJ, Christma T, Black PN, Metcalf P, Gamble GD. COPD prevalence  
26  
27 is increased in lung cancer independent of age, gender and smoking history. *Eur Respir J*.  
28  
29 2009;**34**:380-386.  
30

31  
32  
33 11 Smith SM, Campbell NC, MacLeod U, Lee AJ, Raja A, Wyke S, Ziebland SB, Duff EM,  
34  
35 Ritchie LD, Nicolson MC. Factors contributing to the time taken to consult with symptoms of  
36  
37 lung cancer: a cross-sectional study *Thorax* 2009;**64**: 523-531.  
38

39  
40  
41 12 Hamilton W, Peters TJ, Round A, Sharp D. What are the clinical features of lung cancer  
42  
43 before the diagnosis is made? A population based case-control study. *Thorax* 2005;**60**:1059-  
44  
45 1065.  
46

47  
48  
49 13 Heritage J, Robinson JD, Elliott MN, Beckett M, Wilkes M. Reducing Patients' Unmet  
50  
51 Concerns: The difference one word can make. *J Gen Intern Med*. 2007;**22**:1429-33.  
52

53  
54 14 Barry CA, Bradley, CP, Britten, N, Stevenson, FA, Barber, N. Patients' unvoiced agendas  
55  
56 in general practice consultation: Qualitative study. *BMJ* 2000; **320**: 1246-1250.  
57  
58  
59  
60

1  
2  
3 15 Corner J, Hopkinson J, Fitzsimmons D, Barclay S, Muers, M. Is late diagnosis of lung  
4 cancer inevitable? Interview study of patients' recollections of symptoms before diagnosis.  
5  
6  
7 *Thorax* 2005; **60**:314-319.

8  
9  
10  
11 16 Tod AM, Allmark P, Craven J. Diagnostic delay in lung cancer: a qualitative study. *J Adv*  
12  
13 *Nurs* 2007;**61**: 336-343.

14  
15  
16 17 Wadsworth M, Butterfield W, Blaney R. Health and sickness: the choice of treatment.  
17  
18 London: Tavistock, 1971:1-114.

19  
20  
21 18 Scambler A, Scambler G, Craig D. Kinship and friendship networks and women's demand  
22  
23 for primary care. *Br J Gen Pract* 1981;**26**:746-750.

24  
25  
26 19 Smith LK, Pope, C, Botha JL. Patients' help-seeking experiences and delay in cancer  
27  
28 presentation: a qualitative synthesis. *Lancet* 2005;**366**:825-831.

29  
30  
31 20 Andersen RS, Paarup B, Vedsted P, Bro F, Soendergaard J. 'Containment' as an analytical  
32  
33 framework for understanding patient delay: A qualitative study of cancer patients' symptom  
34  
35 interpretation processes. *Soc Sci Med* 2010;**71**:378-385.

36  
37  
38 21 Macleod U, Mitchell ED, Burgess C, Macdonald S, Ramirez AJ. Risk factors for delayed  
39  
40 presentation and referral of symptomatic cancer: evidence for common cancers. *Brit J*  
41  
42 *Cancer* 2009;**101** (suppl 2): S92-101.

43  
44  
45 22 Jefferson G. Glossary of transcript symbols with an introduction. In: Lerner GH ed.  
46  
47 *Conversation Analysis: Studies From the First Generation*. Philadelphia: John Benjamins  
48  
49 Publishing Company, 2004: 13-23.



- 1  
2  
3 23 Silverman D. Interpreting Qualitative Data, Methods for Analysing Text Talk and  
4  
5 Interaction. London: Sage Publications, 2001:1-323.  
6  
7  
8  
9 24 Roberts C, Sarangi S. Theme oriented discourse analysis of medical encounters. *Med*  
10  
11 *Educ.* 2005;**39**:632–640.  
12  
13  
14 25 Roberts, C. What counts as discourse analysis and what use is it? *BMJ* 2008;337:a879.  
15  
16  
17 26 Corner, J, Brindle L. The influence of social processes on the timing of cancer diagnosis: a  
18  
19 research agenda. *J Epidemiol Community Health.* 2011;**65**:477-82.  
20  
21  
22  
23 27 Stolper E, Van de Wiell M, Van Royen P, Van Bokhoven M, Van der Weijden T, Dinant  
24  
25 GJ. Gut feelings as a third track in general practitioners' diagnostic reasoning. *J Gen Intern*  
26  
27 *Med* 2011;**26**: 197-203.  
28  
29  
30  
31 28 Robb, K, Stubbings S, Ramirez A, Macleod U, Austoker J, Waller J, et al. Public  
32  
33 awareness of cancer in Britain: a population-based survey of adults. *Brit J Cancer* 2009;**101**  
34  
35 (suppl2):S18-23.  
36  
37  
38  
39 29 National Awareness and Early Diagnosis Initiative (NAEDI).  
40  
41 <http://info.cancerresearchuk.org/spotcancerearly/naedi/AboutNAEDI/> (accessed Aug 2012)  
42  
43  
44 30 Hamilton W. The CAPER studies: five case-control studies aimed at identifying and  
45  
46 quantifying the risk of cancer in symptomatic primary care patients. *Brit J Cancer* 2009;**101**  
47  
48 (suppl 2):S80–6.  
49  
50  
51  
52 31 Cassidy A, Myles JP, Van TM Page RD, Liloglou T, Duffy SW, Field JK. The LLP risk  
53  
54 model: an individual risk prediction model for lung cancer. *Br J Cancer* 2008; **98**:270-276.  
55  
56  
57  
58  
59  
60

1  
2  
3  
4  
5  
6  
7  
8  
9  
10  
11  
12  
13  
14  
15  
16  
17  
18  
19  
20  
21  
22  
23  
24  
25  
26  
27  
28  
29  
30  
31  
32  
33  
34  
35  
36  
37  
38  
39  
40  
41  
42  
43  
44  
45  
46  
47  
48  
49  
50  
51  
52  
53  
54  
55  
56  
57  
58  
59  
60

32 Heritage J. The interaction order and clinical practice: Some observations on dysfunctions and action steps. *Patient Educ Couns* 2011;**84**:338-43.

For peer review only

**Box 1****Transcription Notation** (Simplified and adapted version of Jeffersonian transcribing conventions)

- The speaker is identified by a participant identifier (P1-P28) followed by a colon. The participant's partner is indicated by a P following the participant identifier e.g.:

P24P: No I don't agree

- Round brackets indicate that the material in the brackets is either inaudible, e.g.:

M: I ( ) that

Or there is doubt about its accuracy, e.g.:

M: I (couldn't tell you) that

- A micropause (a noticeable pause of less than 0.2 seconds) is indicated by a dot enclosed in brackets:

(.)

- Non-verbal activities and noticeable pauses of 0.2 seconds or more are indicated within double brackets:

M: Yes ((laughter)) but ((pause)) I don't know

- Square brackets indicate that material has been removed, usually to protect the participant's identity, e.g.:

[ ] or [town]

- Three consecutive dots indicates that a section of transcript has been removed:

M: He ran up the hill...to the house at the top

- Square brackets between adjacent lines of speech mark the start and end of overlapping talk

[ ]

| <b>Table 1</b>                                                                                                                                        |             |
|-------------------------------------------------------------------------------------------------------------------------------------------------------|-------------|
| <b>Patient characteristics (n=20)</b>                                                                                                                 |             |
| <b>Sex</b> (male/female)                                                                                                                              | 13/7        |
| <b>Age – years</b> (median; range)                                                                                                                    | 71.5; 41-86 |
| 40-49                                                                                                                                                 | 1           |
| 50-59                                                                                                                                                 | 1           |
| 60-69                                                                                                                                                 | 6           |
| 70-79                                                                                                                                                 | 10          |
| >=80                                                                                                                                                  | 2           |
| <b>Diagnosis</b>                                                                                                                                      |             |
| Incidental                                                                                                                                            | 8           |
| Symptomatic                                                                                                                                           | 12          |
| <b>Smoking status</b>                                                                                                                                 |             |
| Current smoker                                                                                                                                        | 4           |
| Ceased in the last 3 months                                                                                                                           | 4           |
| Former smoker (ceased >3 months ago)                                                                                                                  | 11          |
| Never smoker                                                                                                                                          | 1           |
| <b>Comorbidities:</b>                                                                                                                                 |             |
| Symptomatic COPD (spirometry +ve or clinical diagnosis)                                                                                               | 8           |
| Primary/Secondary Care COPD diagnosis (primary care diagnosis preceding 2ndry care LC investigation/diagnosis during secondary care LC investigation) | 3/5         |
| Asthma                                                                                                                                                | 5           |
| Ischaemic Heart Disease                                                                                                                               | 1           |
| Congestive cardiac failure                                                                                                                            | 1           |
| Other cardiac Problems                                                                                                                                | 2           |
| <b>Socioeconomic status</b> (Index of Multiple Deprivation):                                                                                          |             |
| Most deprived 50%                                                                                                                                     | 8           |
| Least deprived 50%                                                                                                                                    | 12          |

**Table 2: Accounts of general health**

|                 | <b>Feeling well despite symptoms</b>                                                                                                                                                                                                                                                                                                                                                                                                                                                                                                                                                                                                                                                                                                                                                                                      |
|-----------------|---------------------------------------------------------------------------------------------------------------------------------------------------------------------------------------------------------------------------------------------------------------------------------------------------------------------------------------------------------------------------------------------------------------------------------------------------------------------------------------------------------------------------------------------------------------------------------------------------------------------------------------------------------------------------------------------------------------------------------------------------------------------------------------------------------------------------|
| <b>P7</b>       | <p>LR: But you have had these headaches. Um. Would you say you've been feeling generally unwell?</p> <p>P7: Not really</p> <p>P7P: I don't know if you're feeling unwell</p> <p>P7: No. Just odd now and again.</p>                                                                                                                                                                                                                                                                                                                                                                                                                                                                                                                                                                                                       |
| <b>P10</b>      | <p>P10: I mean I've been quite healthy (.) I've got high blood pressure I mean I've had that ooh [&gt;20 years]... so that's all fairly long going you know but I haven't had any actual illnesses or anything</p>                                                                                                                                                                                                                                                                                                                                                                                                                                                                                                                                                                                                        |
| <b>P11</b>      | <p>P11: I didn't feel anything was wrong inside. I mean I had no inkling at all. Um. If I had had that x-ray, but I wouldn't have known because I (.) there was (.) I felt quite well really, it was only just you know this operation on my neck</p>                                                                                                                                                                                                                                                                                                                                                                                                                                                                                                                                                                     |
| <b>P16</b>      | <p>P16: When I had the cough you know she said they'd picked up the shadow...I probably sat there for a few seconds you know trying to take it in but that wasn't, when she said that I didn't get the feeling then that there was something wrong (LR: No) because as far as I knew I hadn't got anything wrong with me, but it's so there you are.</p>                                                                                                                                                                                                                                                                                                                                                                                                                                                                  |
| <b>P25</b>      | <p>P25: I was ill a lot last year but when I was taken into hospital and the antibiotics and the treatment I had and the months rest I had when I came home where I wasn't going to work (since then I've cut my hours down) I feel so well. But I honestly was not expecting anything like that to be said to me, because I feel so much better than I did last year... In fact I feel better now at the moment than I have done for a long time...you see once I've had my antibiotics or a bit of an inhaler I'm fine again, like I am now. So at the moment, I feel so much better that I think it's not making any sense to me.</p>                                                                                                                                                                                  |
|                 | <b>Exceptions to feeling well despite symptoms – declining health</b>                                                                                                                                                                                                                                                                                                                                                                                                                                                                                                                                                                                                                                                                                                                                                     |
| <b>P17</b>      | <p>P17: About a year ago. "What's that? What's going wrong with me" you know and I was going like that. Everything goes tonta... feels as though I can't breathe you know and then I'd just (indicates short breaths) only for a second, and then it's gone and then I'd go back to breathing and everything like that, ... And that was about a year ago, that's when I noticed "[ ], there's something wrong with you".</p>                                                                                                                                                                                                                                                                                                                                                                                             |
| <b>P19</b><br>: | <p>LB: How would you describe how you feel now?</p> <p>P19: Not perfect. No. I mean I'm tired now. This made me tired! That's shows you how and it wouldn't normally do that!</p>                                                                                                                                                                                                                                                                                                                                                                                                                                                                                                                                                                                                                                         |
| <b>P20</b><br>: | <p>P20: And it was afterwards I was thinking I shall be able to get back on me feet now but instead I seem to be going on a slow decline. And I started to lose weight and like I said, things started tasting funny and all this, and I'm saying "Ok". And then I'd have a cold and this cough that wouldn't go away and to be honest I used to be coughing nearly all the time and it was like having a cold 24 hours a day, seven days a week. I'd start to get really tired and as I say, I was quite busy on Tuesday and I was throwing out rubbish... and then I cleaned all me windows. And yesterday, I felt like I'd been run over by a ten ton truck! And I thought 'well this is not me' It's just not me...maybe it's mental, you know, your own brain saying 'your body's not very well, just slow down'</p> |
| <b>P26</b>      | <p>P26P: This last year she's deteriorated in many things.</p> <p>P26: Well I think you can understand it though.</p> <p>P26P: That's geriatrics for you isn't it?</p> <p>P26: No it isn't you can understand it, when you've had a cough for this long. I mean it really takes it out of you, it really does. You try explaining that to the doctor!</p>                                                                                                                                                                                                                                                                                                                                                                                                                                                                 |

**Table 3: Patient reported symptoms and triggers to diagnosis**

| Participant                  | Triggers to diagnosis                                       | Symptoms of concern/disease (Elicited by open questions except where indicated)                                                                           | Symptoms as normal processes (Elicited by closed questions except where indicated)                              |
|------------------------------|-------------------------------------------------------------|-----------------------------------------------------------------------------------------------------------------------------------------------------------|-----------------------------------------------------------------------------------------------------------------|
| <b>Symptomatic Diagnoses</b> |                                                             |                                                                                                                                                           |                                                                                                                 |
| 06                           | Severe cough > 3 weeks                                      | Severe productive cough (3-4 times a year of 2 days duration, for 5 years.)                                                                               | Increase in breathlessness, Fatigue                                                                             |
| 08                           | Weight loss                                                 | weight loss                                                                                                                                               | <sup>1</sup> Weight loss – some weight now regained ( <b>open question</b> )                                    |
| 12                           | Persistent cough; haemoptysis                               | Persistent, tickly, non-productive, mild cough; haemoptysis                                                                                               | Aches and discomfort: Stiff neck and left shoulders; weight loss; some discomfort with coughing as time went on |
| 016                          | Cough; fatigue; feeling unwell; appetite loss; weight loss. | Appetite loss; weight loss - returned to normal; dry cough; feeling unwell                                                                                | Increase in breathlessness; a feeling (not pain) “that something is going on’ in the chest”; fingers go numb.   |
| 018                          | Chest infection; haemoptysis                                | Repeated cough; chest infections; regular sneezing and flu like symptoms; sore throat; fatigue; Sore testicles; flushing across stomach; ache across back | Increase in breathlessness; pain in centre of chest; occasional coughing with chest infection                   |
| 023                          | Weight loss; anaemia                                        | Flu and a scratchy dry cough; night sweats; weight loss; anaemia; tiredness; sensitive gums; soft hair; taste change ( <b>closed question</b> )           | Twinges in fingers and hands                                                                                    |
| 024                          | Haemoptysis; Dyspnea                                        | Haemoptysis; night sweats                                                                                                                                 | Cough; breathlessness and wheezing.                                                                             |
| 025                          | Dyspnea                                                     | Pains in legs and joints; fatigue, breathlessness                                                                                                         | Chest pain recently when lying down.                                                                            |
| 027                          | Dyspnea                                                     | Breathlessness on exertion                                                                                                                                | Occasional hot shooting pain in chest                                                                           |

| <b>Exceptions to the normalisation of symptoms not presented to GPs/elicited by closed questions: Decline narratives (D) and Quest for Diagnosis narratives (Q)</b> |                                                                     |                                                                                                                                                                                                                                                                                                |                                                                                                      |
|---------------------------------------------------------------------------------------------------------------------------------------------------------------------|---------------------------------------------------------------------|------------------------------------------------------------------------------------------------------------------------------------------------------------------------------------------------------------------------------------------------------------------------------------------------|------------------------------------------------------------------------------------------------------|
| 017<br>(D)                                                                                                                                                          | Chest/abdominal pain                                                | Aching pain from indigestion; cough; pain across shoulders; aches; having less energy; breathlessness on resting/panic attacks<br><b>Elicited by closed questions:</b> breathlessness on walking and when lying down                                                                           |                                                                                                      |
| 019<br>(D)                                                                                                                                                          | Anaemia                                                             | Sickness if over eat; bleeding in throat and vomiting large amounts of blood (now stopped).<br><b>Elicited by closed questions:</b> Pain in stomach; loss of appetite; tiredness; increase in breathlessness; pain in chest when breathing in.                                                 |                                                                                                      |
| 020<br>(D and Q)                                                                                                                                                    | Persistent cough                                                    | Weight loss; fatigue; taste change; hot and cold sweats; reduction in appetite ( <b>closed question</b> )                                                                                                                                                                                      | breathlessness on physical activity; weight loss - some weight now regained ( <b>open question</b> ) |
| 026<br>(D and Q)                                                                                                                                                    | Persistent cough; recurrent chest infections for the last 10 years. | Regular chest infections and productive coughs; recent weight loss; cough triggered by eating, talking and cold air; dullish ache in back; coughing up occasional flecks of blood; fatigue and energy loss; night sweats – started at menopause but now every night ( <b>closed question</b> ) |                                                                                                      |
| <b>Incidental Diagnoses</b>                                                                                                                                         |                                                                     |                                                                                                                                                                                                                                                                                                |                                                                                                      |
|                                                                                                                                                                     | <b>Triggers to diagnosis</b>                                        | <b>Symptoms of concern/disease</b><br>(Elicited by open questions)                                                                                                                                                                                                                             | <b>Symptoms as normal processes</b> (Elicited by closed questions)                                   |
| 03                                                                                                                                                                  | CXR following traumatic injury                                      | Gradually increasing breathlessness not noticed until diagnosis.                                                                                                                                                                                                                               | Weight loss                                                                                          |
| 07                                                                                                                                                                  | Routine CXR on hospital admission                                   |                                                                                                                                                                                                                                                                                                | Fatigue                                                                                              |
| 010                                                                                                                                                                 | Routine CXR on hospital admission                                   |                                                                                                                                                                                                                                                                                                | Change in bowel movements, fatigue                                                                   |
| 011                                                                                                                                                                 | CXR Investigation of increased                                      |                                                                                                                                                                                                                                                                                                | Breathlessness; aches and pain back of left shoulder                                                 |

1  
2  
3  
4  
5  
6  
7  
8  
9  
10  
11  
12  
13  
14  
15  
16  
17  
18  
19  
20  
21  
22  
23  
24  
25  
26  
27  
28  
29  
30  
31  
32  
33  
34  
35  
36  
37  
38  
39  
40  
41  
42  
43  
44  
45  
46  
47  
48  
49

|     |                                                                        |                                                |                                      |
|-----|------------------------------------------------------------------------|------------------------------------------------|--------------------------------------|
|     | heart rate following surgery                                           |                                                | under arm and side of chest; fatigue |
| 021 | CXR investigation of weight loss and anaemia detected by health screen | Anaemia                                        | Weight loss                          |
| 022 | CXR following traumatic injury                                         |                                                | Cough; taste change; bowel changes   |
| 028 | Imaging of kidney to investigate haematuria                            | Chest infection following investigation for LC | Breathlessness                       |

<sup>1</sup>Occasionally participants would provide a symptom of concern/disease account when describing previous help-seeking, but would then reinterpret and normalise the symptom if it had improved since seeking help.

Peer review only



**Table 4: Comparison of ‘Symptoms of Concern’ and ‘Symptoms as Normal Processes’ accounts**

|            | Symptoms of Concern/Disease accounts                                                                                                                                                                                                                                                                                                                                                                                                                                                                                                                                                                                                        | Symptoms as Normal Processes accounts                                                                                                                                                                                                                                                                                                                                                                                                                                                                                                                                                                                                                                                                                                                           |
|------------|---------------------------------------------------------------------------------------------------------------------------------------------------------------------------------------------------------------------------------------------------------------------------------------------------------------------------------------------------------------------------------------------------------------------------------------------------------------------------------------------------------------------------------------------------------------------------------------------------------------------------------------------|-----------------------------------------------------------------------------------------------------------------------------------------------------------------------------------------------------------------------------------------------------------------------------------------------------------------------------------------------------------------------------------------------------------------------------------------------------------------------------------------------------------------------------------------------------------------------------------------------------------------------------------------------------------------------------------------------------------------------------------------------------------------|
| <b>P6</b>  | <p>LR: ...how [do] you think it all sort of started?</p> <p>P6: ... we went merrily on our holiday, and the cough just got worse and worse and worse. Coughing 24 hours a day the whole of the five days we were away...I went to see a doctor [who prescribed antibiotics] ...the antibiotics didn't touch it at all, so when we came back, I went to see one of my own doctors and he said 'you've probably got a chest infection. I'll give you some more antibiotics' ... 'if at the end of seven days it hasn't gone, then I think you'd better go and get an x-ray'.</p>                                                              | <p>LR: OK. So cough, we've done. Breathlessness?</p> <p>P6: ... That [the pacemaker] cured it...so at the moment I'm just left with the cough or whatever...</p> <p>LR: So the only times you get breathless really are then when you're coughing?</p> <p>P6: Yeah.</p> <p>LR: Do you notice (.) is there any other time now</p> <p>P6: Occasionally I get breathless walking up hill, but that's to be expected.</p> <p>P6P: And you did a bit Friday which was stress I think.</p> <p>P6: Yeah, Friday...It does occasionally happen when I'm sitting down ... Up to recently I've been playing golf twice a week, so there can't be an awful lot wrong with me, but I do get occasionally short of breath...Just suddenly start breathing rather rapidly</p> |
| <b>P12</b> | <p>LB: Do you want to just tell me how you came to be in Mr [ ] clinic and what were the events that</p> <p>[ ]</p> <p>P12: yes. I had a particularly persistent cough that wouldn't go away...although it was literally just a sort of a clearing the throat, that sort of thing... [then] I woke in the middle of the night with a cough, my mouth filled with what I thought was catarrh, went to the basin, spat it out (.) blood bright red and dark red. And it bled for about 10 or 15 minutes...and it hasn't bled since... Anyway, Monday ... went to see GP... immediately gave me the ticket to go to the walk in x-ray [ ].</p> | <p>LB: Have you lost any weight at all?</p> <p>P12: A bit, mm. I would say less than half a stone</p> <p>P12P: We have a very active cruise, we do a lot of walking and sightseeing...</p> <p>P12: And then you know, we go to [UK holiday destination] most years. And we walk a tremendous amount. And I swim a lot there, don't I? So that's a very active holiday.</p>                                                                                                                                                                                                                                                                                                                                                                                      |

|                   |                                                                                                                                                                                                                                                                                                                                                                                                                   |                                                                                                                                                                                                                                                                                                                                                                                                                                                                                                                                                                                                                                                                                                                                                                                                                                                                                    |
|-------------------|-------------------------------------------------------------------------------------------------------------------------------------------------------------------------------------------------------------------------------------------------------------------------------------------------------------------------------------------------------------------------------------------------------------------|------------------------------------------------------------------------------------------------------------------------------------------------------------------------------------------------------------------------------------------------------------------------------------------------------------------------------------------------------------------------------------------------------------------------------------------------------------------------------------------------------------------------------------------------------------------------------------------------------------------------------------------------------------------------------------------------------------------------------------------------------------------------------------------------------------------------------------------------------------------------------------|
| <p><b>P16</b></p> | <p>P16: I developed a cough and also that I didn't feel very well and I'd also lost some weight. I went to the doctors ... [s/he] sent me for a blood test and an x-ray. And several days later [s/he] rang and said I want to see you and by this time I'd got my appetite back and my weight had come back up again...</p>                                                                                      | <p>P16 : I think perhaps if it had just been a cough, perhaps I wouldn't have bothered ...</p> <p>P16P: ... after you were feeling better, you'd put weight back on and you'd still got this funny cough, I think you could have gone on for months with that funny cough</p> <p>[ ]...</p> <p>P16: LR: have you experienced any breathlessness at all? ((pause)) Or sort of thing like you</p> <p>[ ]</p> <p>P16: I play golf and parts of the course are a bit steep and I must admit I get a bit puffed going up there but yeah it's not serious I just got to take it easy... as you get older so you can't do the things you did when you were a bit younger so ...quite often you put things down to change of your age and lifestyle and it wasn't that significant...I really wouldn't say I get breathless, I mean you [participant's wife] couldn't keep up with me.</p> |
| <p><b>P23</b></p> | <p>P23: and then we got to Christmas, and we were partying etc and to be quite honest, I should have put on more weight than I did. So I started to think 'well what's going on?' About [ ] months ago I had a colonoscopy and had a few polyps removed etc...I started to get night sweats, totally different from hot flushes...so I thought 'oooh this is a bit odd'.</p>                                      | <p>LB: Have you suffered from any backache or shoulder ache?</p> <p>P23: No.</p> <p>LB: Anything that you thought might be something else wrong?</p> <p>P23: I've had perhaps the odd twinge [in fingers] that I would put down to arthritis while doing the garden or something but – this is the annoying fact, I am quite healthy; well I think I'm quite healthy, and so no I wouldn't say I've had aches and pains.</p>                                                                                                                                                                                                                                                                                                                                                                                                                                                       |
| <p><b>P24</b></p> | <p>P24: I started coughing up blood and I was already at Dr [ ]s clinic and when I told [ her ] I was coughing up blood, s/he referred me to the chest clinic which is next to Oncology, so that made me feel a bit suspicious... By that time I was admitted to hospital because I was coughing up what I thought was a lot of blood, and I had a lot of problem breathing... Dr [ ] came over to see ...and</p> | <p>LB:...when you were having breathing problems, did you ever have any wheezing with it?</p> <p>P24: Oh I do wheeze a bit in bed now. It's just you get used to the noises that your chest makes don't you really? I just think 'oh shut up'. I mean I do sleep very, very well unless I'm depressed...Sometimes just when I lie down I'll wheeze a bit and that's</p>                                                                                                                                                                                                                                                                                                                                                                                                                                                                                                            |

|            |                                                                               |                                                                                                                                                                                                                                                                                                                                                                                                                                                                                                                                                                                                                                                                                                                                                                                                                                              |
|------------|-------------------------------------------------------------------------------|----------------------------------------------------------------------------------------------------------------------------------------------------------------------------------------------------------------------------------------------------------------------------------------------------------------------------------------------------------------------------------------------------------------------------------------------------------------------------------------------------------------------------------------------------------------------------------------------------------------------------------------------------------------------------------------------------------------------------------------------------------------------------------------------------------------------------------------------|
|            | he changed my inhalers and took me off beta blockers and transformed my life! | obviously changing from upright position to lying down but and not to any extent.                                                                                                                                                                                                                                                                                                                                                                                                                                                                                                                                                                                                                                                                                                                                                            |
|            | <b>Incidental Diagnosis</b>                                                   |                                                                                                                                                                                                                                                                                                                                                                                                                                                                                                                                                                                                                                                                                                                                                                                                                                              |
| <b>P3</b>  |                                                                               | <p>LR: Er, so have you had any weight loss at all?</p> <p>P3: Yes. The lady [ ] that dances with me, she's been making off for months now that I'm losing weight.</p> <p>LR: Yeah?</p> <p>P3: Yeah. So I expect to lose weight in the summer months because you're more active over the allotments. ... plus the days are longer so you spend longer away from home so you don't eat so much, but I used to be [ ] stone, but when she weighed me yesterday with my clothes on, she said I was [1.5 stones less]</p> <p>LR: ...you think that's just over the summer or ?</p> <p>P3: I reckon that's over the last two years.</p> <p>LR: Yeah?</p> <p>RES: Yeah. I reckon about the last two years, because I always said [1.5 stone heavier than current weight ] stones is too heavy for me. And then people would say it's a beer gut</p> |
| <b>P28</b> |                                                                               | <p>LB: Have you had any other types of cough that have lasted more than three weeks?</p> <p>P28: No.</p> <p>LB: No. Would you say you had a smokers cough...</p> <p>P28: No I wouldn't actually! Would you? No.</p> <p>P28P: Not really.</p> <p>P28: No, never hacking coughs or anything.</p> <p>P28P: not a dry cough like ( )</p> <p>LB: Sorry you didn't have a dry cough?</p> <p>P28P: No. No. ((pause)) No more than a lot of people have got you know. In the day and you know</p>                                                                                                                                                                                                                                                                                                                                                    |

## APPENDIX 1 (Web Only File)

### Interview topic guide: IPCARD Chest Symptoms Study

- I. +II. **Unstructured and Semi-structured interview:**
- Record patient's health and illness experiences
  - Focussing on the period leading up to their referral for LC Investigation and all experiences of health and illness during the last 2 years, explore:
    - participants' interpretations of and explanations for symptoms
    - Impact of ill health/symptoms
- III. **Structured interview:**
- Explore list of specific symptom presentations and health changes (attached).
- IV. **Further semi-structured interview questions:** Help-seeking behaviour and use of health services (These questions are to follow accounts of symptoms elicited in sections I, II and III):
- What did you do about [symptom/health change]?
    - any health care, treatments, information or advice received
    - reasons for seeking or not seeking medical help.

### Introduction

“Thank you for agreeing to this interview. It should take about 60-90 minutes to complete. If at any time, you wish to stop or have a break, please let me know. If you want any questions repeated or clarified, please ask. I would like to build up a detailed picture of your experiences of health and illness. I am interested in anything that you noticed about your health even if you thought it was minor or not connected to your recent visit to [hospital/clinic]. I will then be asking you to talk in more detail about your experiences of health from when you first noticed a change in your health up to the time when you were referred to the [clinic] and about all aspects of your health in the last 2 years.”

### Section I

The topic guide provides a number of questions which the interviewer might use to initiate discussion about a particular topic. However, the interviewer might revise the questions, or alter their order, in light of the interviewee's response to earlier questions.

#### Part 1: Exploration of health and illness

Purpose: To explore the participant's experiences of health and illness over their lifetime including any symptoms/problems/changes in health that they have noticed in the last 2 years.

- Please tell me about your health and any illnesses that you have experienced
- How has your health changed (are there any changes that you noticed)?

- <sup>1</sup> Could you tell me how you came to be in Dr [ ]'s clinic/ came to be seeing Dr X

## Section II

- When did you first notice something was wrong, or a there had been a change in your health?
- Have you experienced any other changes in your health during the last 2 years?

Prompts: use following prompts to aid recall of dates:

- o What year was this?
- o What month was this?
- o What season was this?
- o What it close to an event in the year, such as Christmas or Easter?
- o Was this at the same time as any other event in your life?
- o Was this at the same time as any family/ social event?
- o What else was going on in your life at the time?
- Has there been anything else that you have visited your doctor about during the last 2 years?
- Has there been anything else at all relating to your health that you have noticed during the last 2 years even if minor?

Probes: for all illnesses explore:

- o Severity
- o Duration
- o Change over time/how/when (use same probes as for Part 1)
- o Impact (social/lifestyle/ family/psychological/ what did the participant think about their symptom)
- o Participant's explanations for illness/associated with?/causes

<sup>1</sup>This question was asked first in earlier interviews but was either omitted, or asked after questions about general health and health changes, in later interviews.

## Section III

"I have a list of things that some people notice before they are told that they have a chest problem. I am going to ask you if you experienced each of these things. I will then ask you about each health change that you experienced in more detail."

- |                                                       |                                                |
|-------------------------------------------------------|------------------------------------------------|
| 01. Cough                                             | YES NO (see structured guide - cough)          |
| 02. Coughing up blood                                 | YES NO (see structured guide - haemoptysis)    |
| 03. Breathlessness or panic attacks                   | YES NO (see structured guide - breathlessness) |
| 04. Changes in eating, appetite, taste or weight      | YES NO (see structured guide - eating/weight)  |
| 05. Pain                                              | YES NO (see structured guide - pain)           |
| 06. Discomfort or strange sensations                  | YES NO (see structured guide - discomfort)     |
| 07. Aches or pain in chest, back, shoulders or joints |                                                |

|    |                                           |                                                |
|----|-------------------------------------------|------------------------------------------------|
| 1  |                                           |                                                |
| 2  |                                           |                                                |
| 3  | (if not mentioned in response to 5 and 6) | YES NO (see structured guide – specific aches) |
| 4  | 08. Skin changes                          | YES NO (see structured guide – skin)           |
| 5  | 09. Lots of infections                    | YES NO (see structured guide - infections)     |
| 6  | 10. Tiredness                             | YES NO (see structured guide – tiredness)      |
| 7  | 11. Feeling generally unwell              | YES NO (see structured guide – unwell)         |
| 8  | 12. Hot or cold sweats                    | YES NO (see structured guide – sweats)         |
| 9  | 13. Voice changes or hoarseness           | YES NO (see structured guide – voice changes)  |
| 10 | 14. Other (DESCRIBE) -----                | YES NO (see generic guide – other)             |
| 11 |                                           |                                                |
| 12 |                                           |                                                |
| 13 |                                           |                                                |

14 Information: Turn to relevant problems identified by participant. Only sections relating to  
 15 the problems/changes identified by the should be completed  
 16

#### 17 Section IV

20 **Semi-structured interview: Help-seeking behaviour and use of health services** (These  
 21 questions follow accounts of symptoms elicited in sections I, II and III, and do not  
 22 necessarily come at the end of the interview):  
 23

- 24 • What did you do about the symptom?

##### 25 Prompts

- 26 ○ Confided in close family member/friend– who did you talk to first?/who else did you  
 27 speak to
- 28 ○ Found information (Read health related article in magazine or book, Consulted a  
 29 medical dictionary/encyclopaedia, watched a health related TV/Video, Undertook an  
 30 internet search),
- 31 ○ Sought advice (e.g. Sought advice from NHS direct/ walk-in centre, Spoke to  
 32 practice nurse/other health professional, Spoke to your GP/made appointment to see  
 33 GP)
- 34 ○ Treatment (other than GP advised) Took over the counter medication (self-prescribed  
 35 or pharmacist consulted), Took complementary medicine/ therapy
- 36
- 37
- 38
- 39
- 40
- 41
- 42 • Why was that, what was it about your [symptom] that made you do /see X/not seek  
 43 help?
- 44
- 45
- 46 • What happened when you did X?
- 47
- 48
- 49 • Have you done anything further about/received any further medical care /help with  
 50 [symptom] since X?
- 51
- 52 ○ If further help was sought - what made you seek this help?
- 53
- 54
- 55 • Please describe any changes in the way you manage or live with the [symptom] since  
 56 x
- 57
- 58
- 59
- 60

1  
2  
3 Relationship with GP and barriers to use of primary care services

- 4 • Have there been any circumstances in which you were unsure about whether to seek help  
5 from your GP?  
6  
7 • What things have made you decide against visiting your GP/practice nurse?  
8  
9 • Have there been any other circumstances in which attending your GP would have been  
10 difficult?  
11 ○ What were these?  
12  
13  
14  
15  
16  
17  
18  
19  
20  
21  
22  
23  
24  
25  
26  
27  
28  
29  
30  
31  
32  
33  
34  
35  
36  
37  
38  
39  
40  
41  
42  
43  
44  
45  
46  
47  
48  
49  
50  
51  
52  
53  
54  
55  
56  
57  
58  
59  
60

For peer review only

## APPENDIX 1 (Web Only File)

### Interview topic guide: IPCARD Chest Symptoms Study

- I. +II. **Unstructured and Semi-structured interview:**
- Record patient's health and illness experiences
  - Focussing on the period leading up to their referral for LC Investigation and all experiences of health and illness during the last 2 years, explore:
    - participants' interpretations of and explanations for symptoms
    - Impact of ill health/symptoms
- III. **Structured interview:**
- Explore list of specific symptom presentations and health changes (attached).
- IV. **Further semi-structured interview questions:** Help-seeking behaviour and use of health services (These questions are to follow accounts of symptoms elicited in sections I, II and III):
- What did you do about [symptom/health change]?
    - any health care, treatments, information or advice received
    - reasons for seeking or not seeking medical help.

### Introduction

“Thank you for agreeing to this interview. It should take about 60-90 minutes to complete. If at any time, you wish to stop or have a break, please let me know. If you want any questions repeated or clarified, please ask. I would like to build up a detailed picture of your experiences of health and illness. I am interested in anything that you noticed about your health even if you thought it was minor or not connected to your recent visit to [hospital/clinic]. I will then be asking you to talk in more detail about your experiences of health from when you first noticed a change in your health up to the time when you were referred to the [clinic] and about all aspects of your health in the last 2 years.”

### Section I

The topic guide provides a number of questions which the interviewer might use to initiate discussion about a particular topic. However, the interviewer might revise the questions, or alter their order, in light of the interviewee's response to earlier questions.

#### Part 1: Exploration of health and illness

Purpose: To explore the participant's experiences of health and illness over their lifetime including any symptoms/problems/changes in health that they have noticed in the last 2 years.

- Please tell me about your health and any illnesses that you have experienced
- How has your health changed (are there any changes that you noticed)?



- <sup>1</sup> Could you tell me how you came to be in Dr [ ]'s clinic/ came to be seeing Dr X

## Section II

- When did you first notice something was wrong, or a there had been a change in your health?
- Have you experienced any other changes in your health during the last 2 years?

Prompts: use following prompts to aid recall of dates:

- o What year was this?
- o What month was this?
- o What season was this?
- o What it close to an event in the year, such as Christmas or Easter?
- o Was this at the same time as any other event in your life?
- o Was this at the same time as any family/ social event?
- o What else was going on in your life at the time?
- Has there been anything else that you have visited your doctor about during the last 2 years?
- Has there been anything else at all relating to your health that you have noticed during the last 2 years even if minor?

Probes: for all illnesses explore:

- o Severity
- o Duration
- o Change over time/how/when (use same probes as for Part 1)
- o Impact (social/lifestyle/ family/psychological/ what did the participant think about their symptom)
- o Participant's explanations for illness/associated with?/causes

<sup>1</sup>This question was asked first in earlier interviews but was either omitted, or asked after questions about general health and health changes, in later interviews.

## Section III

"I have a list of things that some people notice before they are told that they have a chest problem. I am going to ask you if you experienced each of these things. I will then ask you about each health change that you experienced in more detail."

- |                                                       |                                                |
|-------------------------------------------------------|------------------------------------------------|
| 01. Cough                                             | YES NO (see structured guide - cough)          |
| 02. Coughing up blood                                 | YES NO (see structured guide - haemoptysis)    |
| 03. Breathlessness or panic attacks                   | YES NO (see structured guide - breathlessness) |
| 04. Changes in eating, appetite, taste or weight      | YES NO (see structured guide – eating/weight)  |
| 05. Pain                                              | YES NO (see structured guide - pain)           |
| 06. Discomfort or strange sensations                  | YES NO (see structured guide – discomfort)     |
| 07. Aches or pain in chest, back, shoulders or joints |                                                |

|    |                                           |                                                |
|----|-------------------------------------------|------------------------------------------------|
| 1  |                                           |                                                |
| 2  |                                           |                                                |
| 3  | (if not mentioned in response to 5 and 6) | YES NO (see structured guide – specific aches) |
| 4  | 08. Skin changes                          | YES NO (see structured guide – skin)           |
| 5  | 09. Lots of infections                    | YES NO (see structured guide - infections)     |
| 6  | 10. Tiredness                             | YES NO (see structured guide – tiredness)      |
| 7  | 11. Feeling generally unwell              | YES NO (see structured guide – unwell)         |
| 8  | 12. Hot or cold sweats                    | YES NO (see structured guide – sweats)         |
| 9  | 13. Voice changes or hoarseness           | YES NO (see structured guide – voice changes)  |
| 10 | 14. Other (DESCRIBE) -----                | YES NO (see generic guide – other)             |
| 11 |                                           |                                                |
| 12 |                                           |                                                |
| 13 |                                           |                                                |

14 Information: Turn to relevant problems identified by participant. Only sections relating to  
 15 the problems/changes identified by the should be completed  
 16

#### 17 Section IV

20 **Semi-structured interview: Help-seeking behaviour and use of health services** (These  
 21 questions follow accounts of symptoms elicited in sections I, II and III, and do not  
 22 necessarily come at the end of the interview):  
 23

- 24 • What did you do about the symptom?

##### 25 Prompts

- 26 ○ Confided in close family member/friend– who did you talk to first?/who else did you  
 27 speak to
- 28 ○ Found information (Read health related article in magazine or book, Consulted a  
 29 medical dictionary/encyclopaedia, watched a health related TV/Video, Undertook an  
 30 internet search),
- 31 ○ Sought advice (e.g .Sought advice from NHS direct/ walk-in centre, Spoke to  
 32 practice nurse/other health professional, Spoke to your GP/made appointment to see  
 33 GP)
- 34 ○ Treatment (other than GP advised) Took over the counter medication (self-prescribed  
 35 or pharmacist consulted), Took complementary medicine/ therapy
- 36
- 37
- 38
- 39
- 40
- 41
- 42 • Why was that, what was it about your [symptom] that made you do /see X/not seek  
 43 help?
- 44
- 45
- 46 • What happened when you did X?
- 47
- 48
- 49 • Have you done anything further about/received any further medical care /help with  
 50 [symptom] since X?
- 51
- 52 ○ If further help was sought - what made you seek this help?
- 53
- 54
- 55 • Please describe any changes in the way you manage or live with the [symptom] since  
 56 x
- 57
- 58
- 59
- 60

1  
2  
3 Relationship with GP and barriers to use of primary care services

- 4 • Have there been any circumstances in which you were unsure about whether to seek help  
5 from your GP?  
6  
7 • What things have made you decide against visiting your GP/practice nurse?  
8  
9 • Have there been any other circumstances in which attending your GP would have been  
10 difficult?  
11     ○ What were these?  
12  
13  
14  
15  
16  
17  
18  
19  
20  
21  
22  
23  
24  
25  
26  
27  
28  
29  
30  
31  
32  
33  
34  
35  
36  
37  
38  
39  
40  
41  
42  
43  
44  
45  
46  
47  
48  
49  
50  
51  
52  
53  
54  
55  
56  
57  
58  
59  
60

For peer review only

## COREQ guidelines table

| Domain 1:<br>Research team<br>and reflexivity |                                          |                                                                                                                                            | Comment                                                                                                                                                             |
|-----------------------------------------------|------------------------------------------|--------------------------------------------------------------------------------------------------------------------------------------------|---------------------------------------------------------------------------------------------------------------------------------------------------------------------|
| Personal<br>Characteristics                   |                                          |                                                                                                                                            |                                                                                                                                                                     |
| 1.                                            | Interviewer/facilitator                  | Which author/s conducted the interview?                                                                                                    | LB                                                                                                                                                                  |
| 2.                                            | Credentials                              | What were the researcher's credentials? <i>E.g. PhD, MD</i>                                                                                | BA PhD                                                                                                                                                              |
| 3.                                            | Occupation                               | What was their occupation at the time of the study?                                                                                        | Research Fellow                                                                                                                                                     |
| 4.                                            | Gender                                   | Was the researcher male or female?                                                                                                         | Female                                                                                                                                                              |
| 5.                                            | Experience and training                  | What experience or training did the researcher have?                                                                                       | >15 years experience of conducting and leading qualitative research.                                                                                                |
| Relationship with participants                |                                          |                                                                                                                                            |                                                                                                                                                                     |
| 6.                                            | Relationship established                 | Was a relationship established prior to study commencement?                                                                                | No – participants were recruited following contact with a clinician                                                                                                 |
| 7.                                            | Participant knowledge of the interviewer | What did the participants know about the researcher? <i>e.g. personal goals, reasons for doing the research</i>                            | Participants were made aware of reasons for doing the research – to better understand their experiences of health and symptoms. And develop a symptom questionnaire |
| 8.                                            | Interviewer characteristics              | What characteristics were reported about the interviewer/facilitator? <i>e.g. Bias, assumptions, reasons and interests in the research</i> | Research interests were reported                                                                                                                                    |

## COREQ guidelines table

|                                   |                                       |                                                                                                                                                                 |                                                                                                                                                                      |
|-----------------------------------|---------------------------------------|-----------------------------------------------------------------------------------------------------------------------------------------------------------------|----------------------------------------------------------------------------------------------------------------------------------------------------------------------|
|                                   |                                       | <i>topic</i>                                                                                                                                                    |                                                                                                                                                                      |
| <b>Domain 2:<br/>study design</b> |                                       |                                                                                                                                                                 |                                                                                                                                                                      |
| Theoretical framework             |                                       |                                                                                                                                                                 |                                                                                                                                                                      |
| 9.                                | Methodological orientation and Theory | What methodological orientation was stated to underpin the study? <i>e.g. grounded theory, discourse analysis, ethnography, phenomenology, content analysis</i> | Discourse analysis, thematic analysis and Constant comparative method                                                                                                |
| Participant selection             |                                       |                                                                                                                                                                 |                                                                                                                                                                      |
| 10.                               | Sampling                              | How were participants selected? <i>e.g. purposive, convenience, consecutive, snowball</i>                                                                       | Two sampling methods were used, consecutive sampling of eligible patients attending surgeons and opportunistic sampling of patients by clinician letter.             |
| 11.                               | Method of approach                    | How were participants approached? <i>e.g. face-to-face, telephone, mail, email</i>                                                                              | Consecutively sampled participants were approached face to face. Participants contacted by letter who expressed interest in the study were then approached by phone. |
| 12.                               | Sample size                           | How many participants were in the study?                                                                                                                        | 20                                                                                                                                                                   |
| 13.                               | Non-participation                     | How many people refused to participate or dropped out? Reasons?                                                                                                 | 3                                                                                                                                                                    |
| Setting                           |                                       |                                                                                                                                                                 |                                                                                                                                                                      |

## COREQ guidelines table

|                               |                              |                                                                                          |                                                                                                                                                |
|-------------------------------|------------------------------|------------------------------------------------------------------------------------------|------------------------------------------------------------------------------------------------------------------------------------------------|
| 14.                           | Setting of data collection   | Where was the data collected? e.g. <i>home, clinic, workplace</i>                        | Participants own homes (18). Hospital setting (2).                                                                                             |
| 15.                           | Presence of non-participants | Was anyone else present besides the participants and researchers?                        | In 3 cases a partner (2) or carer (1) was present. If a partner was present this is indicated in the excerpts presented.                       |
| 16.                           | Description of sample        | What are the important characteristics of the sample? e.g. <i>demographic data, date</i> | Route to diagnosis (symptomatic, incidental), age, comorbidities.                                                                              |
|                               | Data collection              |                                                                                          |                                                                                                                                                |
| 17.                           | Interview guide              | Were questions, prompts, guides provided by the authors? Was it pilot tested?            | The Interview guide was pilot tested.                                                                                                          |
| 18.                           | Repeat interviews            | Were repeat interviews carried out? If yes, how many?                                    | No                                                                                                                                             |
| 19.                           | Audio/visual recording       | Did the research use audio or visual recording to collect the data?                      | Audio-recording                                                                                                                                |
| 20.                           | Field notes                  | Were field notes made during and/or after the interview or focus group?                  | Field notes were made after the interview.                                                                                                     |
| 21.                           | Duration                     | What was the duration of the interviews or focus group?                                  | 1 - 1.5 hours.                                                                                                                                 |
| 22.                           | Data saturation              | Was data saturation discussed?                                                           | Yes                                                                                                                                            |
| 23.                           | Transcripts returned         | Were transcripts returned to participants for comment and/or correction?                 | No. Participants were awaiting lung resection and clinicians did not want participants to be contacted in the months following this procedure. |
| <b>Domain 3: analysis and</b> |                              |                                                                                          |                                                                                                                                                |

## COREQ guidelines table

|               |                                |                                                                                                                                          |                                                                                                          |
|---------------|--------------------------------|------------------------------------------------------------------------------------------------------------------------------------------|----------------------------------------------------------------------------------------------------------|
| findings      |                                |                                                                                                                                          |                                                                                                          |
| Data analysis |                                |                                                                                                                                          |                                                                                                          |
| 24.           | Number of data coders          | How many data coders coded the data?                                                                                                     | 2. LB and GL                                                                                             |
| 25.           | Description of the coding tree | Did authors provide a description of the coding tree?                                                                                    | No but a description of main themes was provided                                                         |
| 26.           | Derivation of themes           | Were themes identified in advance or derived from the data?                                                                              | Identified from the data                                                                                 |
| 27.           | Software                       | What software, if applicable, was used to manage the data?                                                                               | MS Word. Discourse analysis was used, so coded data was kept in context within the interview transcript. |
| 28.           | Participant checking           | Did participants provide feedback on the findings?                                                                                       | No – for the reasons given above regarding the return of transcripts                                     |
| Reporting     |                                |                                                                                                                                          |                                                                                                          |
| 29.           | Quotations presented           | Were participant quotations presented to illustrate the themes / findings? Was each quotation identified? e.g. <i>participant number</i> | Yes                                                                                                      |
| 30.           | Data and findings consistent   | Was there consistency between the data presented and the findings?                                                                       | Yes                                                                                                      |
| 31.           | Clarity of major themes        | Were major themes clearly presented in the findings?                                                                                     | Yes                                                                                                      |
| 32.           | Clarity of minor themes        | Is there a description of diverse cases or discussion of minor themes?                                                                   | Yes – exceptions are discussed                                                                           |



**Eliciting symptoms interpreted as normal by patients with early stage lung cancer – could GP elicitation of normalised symptoms reduce delay in diagnosis?: Cross sectional interview study**

|                                 |                                                                                                                                                                                                                                                                                                                                                 |
|---------------------------------|-------------------------------------------------------------------------------------------------------------------------------------------------------------------------------------------------------------------------------------------------------------------------------------------------------------------------------------------------|
| Journal:                        | <i>BMJ Open</i>                                                                                                                                                                                                                                                                                                                                 |
| Manuscript ID:                  | bmjopen-2012-001977.R1                                                                                                                                                                                                                                                                                                                          |
| Article Type:                   | Research                                                                                                                                                                                                                                                                                                                                        |
| Date Submitted by the Author:   | 03-Oct-2012                                                                                                                                                                                                                                                                                                                                     |
| Complete List of Authors:       | Brindle, Lucy; University of Southampton, Faculty of Health Sciences<br>Pope, Catherine; University of Southampton, Health Sciences<br>Corner, Jessica; University of Southampton, Health Sciences<br>Leydon, Geraldine; University of Southampton, Faculty of Medicine<br>Banerjee, Anindo; Southampton General Hospital, Respiratory Medicine |
| <b>Primary Subject Heading</b>: | Qualitative research                                                                                                                                                                                                                                                                                                                            |
| Secondary Subject Heading:      | Patient-centred medicine, General practice / Family practice,<br>Communication, Respiratory medicine, Oncology                                                                                                                                                                                                                                  |
| Keywords:                       | Symptoms, Early cancer diagnosis, Terminology as topic, Help seeking,<br>Lung cancer, Discourse Analysis                                                                                                                                                                                                                                        |
|                                 |                                                                                                                                                                                                                                                                                                                                                 |

SCHOLARONE™  
Manuscripts



## COREQ guidelines table

| Domain 1:<br>Research team<br>and reflexivity |                                          |                                                                                                                                            | Comment                                                                                                                                                             |
|-----------------------------------------------|------------------------------------------|--------------------------------------------------------------------------------------------------------------------------------------------|---------------------------------------------------------------------------------------------------------------------------------------------------------------------|
| Personal<br>Characteristics                   |                                          |                                                                                                                                            |                                                                                                                                                                     |
| 1.                                            | Interviewer/facilitator                  | Which author/s conducted the interview?                                                                                                    | LB                                                                                                                                                                  |
| 2.                                            | Credentials                              | What were the researcher's credentials? <i>E.g. PhD, MD</i>                                                                                | BA PhD                                                                                                                                                              |
| 3.                                            | Occupation                               | What was their occupation at the time of the study?                                                                                        | Research Fellow                                                                                                                                                     |
| 4.                                            | Gender                                   | Was the researcher male or female?                                                                                                         | Female                                                                                                                                                              |
| 5.                                            | Experience and training                  | What experience or training did the researcher have?                                                                                       | >15 years experience of conducting and leading qualitative research.                                                                                                |
| Relationship<br>with<br>participants          |                                          |                                                                                                                                            |                                                                                                                                                                     |
| 6.                                            | Relationship established                 | Was a relationship established prior to study commencement?                                                                                | No – participants were recruited following contact with a clinician                                                                                                 |
| 7.                                            | Participant knowledge of the interviewer | What did the participants know about the researcher? <i>e.g. personal goals, reasons for doing the research</i>                            | Participants were made aware of reasons for doing the research – to better understand their experiences of health and symptoms. And develop a symptom questionnaire |
| 8.                                            | Interviewer characteristics              | What characteristics were reported about the interviewer/facilitator? <i>e.g. Bias, assumptions, reasons and interests in the research</i> | Research interests were reported                                                                                                                                    |

## COREQ guidelines table

|                                   |                                          |                                                                                                                                                                                             |                                                                                                                                                                                              |
|-----------------------------------|------------------------------------------|---------------------------------------------------------------------------------------------------------------------------------------------------------------------------------------------|----------------------------------------------------------------------------------------------------------------------------------------------------------------------------------------------|
|                                   |                                          | <i>topic</i>                                                                                                                                                                                |                                                                                                                                                                                              |
| <b>Domain 2:<br/>study design</b> |                                          |                                                                                                                                                                                             |                                                                                                                                                                                              |
| Theoretical<br>framework          |                                          |                                                                                                                                                                                             |                                                                                                                                                                                              |
| 9.                                | Methodological<br>orientation and Theory | What methodological<br>orientation was stated to<br>underpin the study? <i>e.g.</i><br><i>grounded theory, discourse<br/>analysis, ethnography,<br/>phenomenology, content<br/>analysis</i> | Discourse analysis,<br>thematic analysis and<br>Constant comparative<br>method                                                                                                               |
| Participant<br>selection          |                                          |                                                                                                                                                                                             |                                                                                                                                                                                              |
| 10.                               | Sampling                                 | How were participants<br>selected? <i>e.g. purposive,<br/>convenience, consecutive,<br/>snowball</i>                                                                                        | Two sampling methods<br>were used,<br>consecutive sampling<br>of eligible patients<br>attending surgeons<br>and opportunistic<br>sampling of patients by<br>clinician letter.                |
| 11.                               | Method of approach                       | How were participants<br>approached? <i>e.g. face-to-face,<br/>telephone, mail, email</i>                                                                                                   | Consecutively sampled<br>participants were<br>approached face to<br>face. Participants<br>contacted by letter<br>who expressed<br>interest in the study<br>were then approached<br>by phone. |
| 12.                               | Sample size                              | How many participants were<br>in the study?                                                                                                                                                 | 20                                                                                                                                                                                           |
| 13.                               | Non-participation                        | How many people refused to<br>participate or dropped out?<br>Reasons?                                                                                                                       | 3                                                                                                                                                                                            |
| Setting                           |                                          |                                                                                                                                                                                             |                                                                                                                                                                                              |

## COREQ guidelines table

|                     |                              |                                                                                          |                                                                                                                                                |
|---------------------|------------------------------|------------------------------------------------------------------------------------------|------------------------------------------------------------------------------------------------------------------------------------------------|
| 14.                 | Setting of data collection   | Where was the data collected? e.g. <i>home, clinic, workplace</i>                        | Participants own homes (18). Hospital setting (2).                                                                                             |
| 15.                 | Presence of non-participants | Was anyone else present besides the participants and researchers?                        | In 3 cases a partner (2) or carer (1) was present. If a partner was present this is indicated in the excerpts presented.                       |
| 16.                 | Description of sample        | What are the important characteristics of the sample? e.g. <i>demographic data, date</i> | Route to diagnosis (symptomatic, incidental), age, comorbidities.                                                                              |
| Data collection     |                              |                                                                                          |                                                                                                                                                |
| 17.                 | Interview guide              | Were questions, prompts, guides provided by the authors? Was it pilot tested?            | The Interview guide was pilot tested.                                                                                                          |
| 18.                 | Repeat interviews            | Were repeat interviews carried out? If yes, how many?                                    | No                                                                                                                                             |
| 19.                 | Audio/visual recording       | Did the research use audio or visual recording to collect the data?                      | Audio-recording                                                                                                                                |
| 20.                 | Field notes                  | Were field notes made during and/or after the interview or focus group?                  | Field notes were made after the interview.                                                                                                     |
| 21.                 | Duration                     | What was the duration of the interviews or focus group?                                  | 1 - 1.5 hours.                                                                                                                                 |
| 22.                 | Data saturation              | Was data saturation discussed?                                                           | Yes                                                                                                                                            |
| 23.                 | Transcripts returned         | Were transcripts returned to participants for comment and/or correction?                 | No. Participants were awaiting lung resection and clinicians did not want participants to be contacted in the months following this procedure. |
| <b>Domain 3:</b>    |                              |                                                                                          |                                                                                                                                                |
| <b>analysis and</b> |                              |                                                                                          |                                                                                                                                                |

## COREQ guidelines table

|    |                 |                                |                                                                                                                                          |                                                                                                          |
|----|-----------------|--------------------------------|------------------------------------------------------------------------------------------------------------------------------------------|----------------------------------------------------------------------------------------------------------|
| 1  | <b>findings</b> |                                |                                                                                                                                          |                                                                                                          |
| 2  |                 |                                |                                                                                                                                          |                                                                                                          |
| 3  |                 |                                |                                                                                                                                          |                                                                                                          |
| 4  |                 |                                |                                                                                                                                          |                                                                                                          |
| 5  |                 |                                |                                                                                                                                          |                                                                                                          |
| 6  |                 |                                |                                                                                                                                          |                                                                                                          |
| 7  |                 |                                |                                                                                                                                          |                                                                                                          |
| 8  |                 |                                |                                                                                                                                          |                                                                                                          |
| 9  |                 |                                |                                                                                                                                          |                                                                                                          |
| 10 | Data analysis   |                                |                                                                                                                                          |                                                                                                          |
| 11 |                 |                                |                                                                                                                                          |                                                                                                          |
| 12 | 24.             | Number of data coders          | How many data coders coded the data?                                                                                                     | 2. LB and GL                                                                                             |
| 13 |                 |                                |                                                                                                                                          |                                                                                                          |
| 14 |                 |                                |                                                                                                                                          |                                                                                                          |
| 15 |                 |                                |                                                                                                                                          |                                                                                                          |
| 16 | 25.             | Description of the coding tree | Did authors provide a description of the coding tree?                                                                                    | No but a description of main themes was provided                                                         |
| 17 |                 |                                |                                                                                                                                          |                                                                                                          |
| 18 |                 |                                |                                                                                                                                          |                                                                                                          |
| 19 |                 |                                |                                                                                                                                          |                                                                                                          |
| 20 | 26.             | Derivation of themes           | Were themes identified in advance or derived from the data?                                                                              | Identified from the data                                                                                 |
| 21 |                 |                                |                                                                                                                                          |                                                                                                          |
| 22 |                 |                                |                                                                                                                                          |                                                                                                          |
| 23 |                 |                                |                                                                                                                                          |                                                                                                          |
| 24 | 27.             | Software                       | What software, if applicable, was used to manage the data?                                                                               | MS Word. Discourse analysis was used, so coded data was kept in context within the interview transcript. |
| 25 |                 |                                |                                                                                                                                          |                                                                                                          |
| 26 |                 |                                |                                                                                                                                          |                                                                                                          |
| 27 |                 |                                |                                                                                                                                          |                                                                                                          |
| 28 |                 |                                |                                                                                                                                          |                                                                                                          |
| 29 | 28.             | Participant checking           | Did participants provide feedback on the findings?                                                                                       | No – for the reasons given above regarding the return of transcripts                                     |
| 30 |                 |                                |                                                                                                                                          |                                                                                                          |
| 31 |                 |                                |                                                                                                                                          |                                                                                                          |
| 32 |                 |                                |                                                                                                                                          |                                                                                                          |
| 33 |                 |                                |                                                                                                                                          |                                                                                                          |
| 34 |                 |                                |                                                                                                                                          |                                                                                                          |
| 35 | Reporting       |                                |                                                                                                                                          |                                                                                                          |
| 36 |                 |                                |                                                                                                                                          |                                                                                                          |
| 37 | 29.             | Quotations presented           | Were participant quotations presented to illustrate the themes / findings? Was each quotation identified? e.g. <i>participant number</i> | Yes                                                                                                      |
| 38 |                 |                                |                                                                                                                                          |                                                                                                          |
| 39 |                 |                                |                                                                                                                                          |                                                                                                          |
| 40 |                 |                                |                                                                                                                                          |                                                                                                          |
| 41 |                 |                                |                                                                                                                                          |                                                                                                          |
| 42 |                 |                                |                                                                                                                                          |                                                                                                          |
| 43 |                 |                                |                                                                                                                                          |                                                                                                          |
| 44 | 30.             | Data and findings consistent   | Was there consistency between the data presented and the findings?                                                                       | Yes                                                                                                      |
| 45 |                 |                                |                                                                                                                                          |                                                                                                          |
| 46 |                 |                                |                                                                                                                                          |                                                                                                          |
| 47 |                 |                                |                                                                                                                                          |                                                                                                          |
| 48 |                 |                                |                                                                                                                                          |                                                                                                          |
| 49 | 31.             | Clarity of major themes        | Were major themes clearly presented in the findings?                                                                                     | Yes                                                                                                      |
| 50 |                 |                                |                                                                                                                                          |                                                                                                          |
| 51 |                 |                                |                                                                                                                                          |                                                                                                          |
| 52 |                 |                                |                                                                                                                                          |                                                                                                          |
| 53 | 32.             | Clarity of minor themes        | Is there a description of diverse cases or discussion of minor themes?                                                                   | Yes – exceptions are discussed                                                                           |
| 54 |                 |                                |                                                                                                                                          |                                                                                                          |
| 55 |                 |                                |                                                                                                                                          |                                                                                                          |
| 56 |                 |                                |                                                                                                                                          |                                                                                                          |
| 57 |                 |                                |                                                                                                                                          |                                                                                                          |
| 58 |                 |                                |                                                                                                                                          |                                                                                                          |
| 59 |                 |                                |                                                                                                                                          |                                                                                                          |
| 60 |                 |                                |                                                                                                                                          |                                                                                                          |

## APPENDIX 1 (Web Only File)

### Interview topic guide: IPCARD Symptoms Study

#### I. +II. Unstructured and Semi-structured interview:

- Record patient's health and illness experiences
- Focussing on the period leading up to their referral for LC Investigation and all experiences of health and illness during the last 2 years, explore:
  - participants' interpretations of and explanations for symptoms
  - Impact of ill health/symptoms

#### III. Structured interview:

- Explore list of specific symptom presentations and health changes (attached).

#### IV. Further semi-structured interview questions: Help-seeking behaviour and use of health services (These questions are to follow accounts of symptoms elicited in sections I, II and III):

- What did you do about [symptom/health change]?
  - any health care, treatments, information or advice received
  - reasons for seeking or not seeking medical help.

### Introduction

“Thank you for agreeing to this interview. It should take about 60-90 minutes to complete. If at any time, you wish to stop or have a break, please let me know. If you want any questions repeated or clarified, please ask. I would like to build up a detailed picture of your experiences of health and illness. I am interested in anything that you noticed about your health even if you thought it was minor or not connected to your recent visit to [hospital/clinic]. I will then be asking you to talk in more detail about your experiences of health from when you first noticed a change in your health up to the time when you were referred to the [clinic] and about all aspects of your health in the last 2 years.”

### Section I

The topic guide provides a number of questions which the interviewer might use to initiate discussion about a particular topic. However, the interviewer might revise the questions, or alter their order, in light of the interviewee's response to earlier questions.

#### Part 1: Exploration of health and illness

Purpose: To explore the participant's experiences of health and illness over their lifetime including any symptoms/problems/changes in health that they have noticed in the last 2 years.

- Could you tell me how you came to be in Dr [ ]'s clinic/ came to be seeing Dr X

- Please tell me about your health and any illnesses that you have experienced
- How has your health changed (are there any changes that you noticed)?

## Section II

- When did you first notice something was wrong, or a there had been a change in your health?
- Have you experienced any other changes in your health during the last 2 years?

Prompts: use following prompts to aid recall of dates:

- o What year was this?
- o What month was this?
- o What season was this?
- o What it close to an event in the year, such as Christmas or Easter?
- o Was this at the same time as any other event in your life?
- o Was this at the same time as any family/ social event?
- o What else was going on in your life at the time?
- Has there been anything else that you have visited your doctor about during the last 2 years?
- Has there been anything else at all relating to your health that you have noticed during the last 2 years even if minor?

Probes: for all illnesses explore:

- o Severity
- o Duration
- o Change over time/how/when (use same probes as for Part 1)
- o Impact (social/lifestyle/ family/psychological/ what did the participant think about their symptom)
- o Participant's explanations for illness/associated with?/causes

## Section III

“I have a list of things that some people notice before they are told that they have a chest problem. I am going to ask you if you experienced each of these things. I will then ask you about each health change that you experienced in more detail.”

- |                                                                                                    |                                                |
|----------------------------------------------------------------------------------------------------|------------------------------------------------|
| 01. Cough                                                                                          | YES NO (see structured guide - cough)          |
| 02. Coughing up blood                                                                              | YES NO (see structured guide - haemoptysis)    |
| 03. Breathlessness or panic attacks                                                                | YES NO (see structured guide - breathlessness) |
| 04. Changes in eating, appetite, taste or weight                                                   | YES NO (see structured guide – eating/weight)  |
| 05. Pain                                                                                           | YES NO (see structured guide - pain)           |
| 06. Discomfort or strange sensations                                                               | YES NO (see structured guide – discomfort)     |
| 07. Aches or pain in chest, back, shoulders or joints<br>(if not mentioned in response to 5 and 6) | YES NO (see structured guide – specific aches) |
| 08. Skin changes                                                                                   | YES NO (see structured guide – skin)           |

|                                 |                                               |
|---------------------------------|-----------------------------------------------|
| 09. Lots of infections          | YES NO (see structured guide - infections)    |
| 10. Tiredness                   | YES NO (see structured guide – tiredness)     |
| 11. Feeling generally unwell    | YES NO (see structured guide – unwell)        |
| 12. Hot or cold sweats          | YES NO (see structured guide – sweats)        |
| 13. Voice changes or hoarseness | YES NO (see structured guide – voice changes) |
| 14. Other (DESCRIBE) _____      | YES NO (see generic guide – other)            |

Information: Turn to relevant problems identified by participant. Only sections relating to the problems/changes identified by the should be completed

#### Section IV

**Semi-structured interview: Help-seeking behaviour and use of health services** (These questions follow accounts of symptoms elicited in sections I, II and III, and do not necessarily come at the end of the interview):

- What did you do about the symptom?

##### Prompts

- Confided in close family member/friend– who did you talk to first?/who else did you speak to
  - Found information (Read health related article in magazine or book, Consulted a medical dictionary/encyclopaedia, watched a health related TV/Video, Undertook an internet search),
  - Sought advice (e.g .Sought advice from NHS direct/ walk-in centre, Spoke to practice nurse/other health professional, Spoke to your GP/made appointment to see GP)
  - Treatment (other than GP advised) Took over the counter medication (self-prescribed or pharmacist consulted), Took complementary medicine/ therapy
- Why was that, what was it about your [symptom] that made you do /see X/not seek help?
  - What happened when you did X?
  - Have you done anything further about/received any further medical care /help with [symptom] since X?
    - If further help was sought - what made you seek this help?
  - Please describe any changes in the way you manage or live with the [symptom] since X

Relationship with GP and barriers to use of primary care services

- 1
  - 2
  - 3
  - 4
  - 5
  - 6
  - 7
  - 8
  - 9
  - 10
  - 11
  - 12
  - 13
  - 14
  - 15
  - 16
  - 17
  - 18
  - 19
  - 20
  - 21
  - 22
  - 23
  - 24
  - 25
  - 26
  - 27
  - 28
  - 29
  - 30
  - 31
  - 32
  - 33
  - 34
  - 35
  - 36
  - 37
  - 38
  - 39
  - 40
  - 41
  - 42
  - 43
  - 44
  - 45
  - 46
  - 47
  - 48
  - 49
  - 50
  - 51
  - 52
  - 53
  - 54
  - 55
  - 56
  - 57
  - 58
  - 59
  - 60
- Have there been any circumstances in which you were unsure about whether to seek help from your GP?
  - What things have made you decide against visiting your GP/practice nurse?
  - Have there been any other circumstances in which attending your GP would have been difficult?
    - What were these?

For peer review only



1  
2  
3 **Eliciting symptoms interpreted as normal by patients with early stage lung cancer – could GP**  
4 **elicitation of normalised symptoms reduce delay in diagnosis?: Cross sectional interview study**

5 Lucy Brindle, Catherine Pope, Jessica Corner, Geraldine Leydon, Anindo Banerjee  
6

7 Faculty of Health Sciences, University of Southampton, Building 67, University Road, Southampton,  
8 SO17 1BJ. Phone: 02380 598526; Fax: 02380 597820. Lucy Brindle, Improving Earlier Diagnosis  
9 Research Group Lead.

10 Faculty of Health Sciences, University of Southampton, Building 67, University Road, Southampton,  
11 SO17 1BJ. Catherine Pope, Professor of Medical Sociology.

12 Faculty of Health Sciences, University of Southampton, Building 67, University Road, Southampton,  
13 SO17 1BJ. Jessica Corner, Head of Faculty of Health Sciences.

14 Department of Primary Medical Care, University of Southampton, Aldermoor Health Centre,  
15 Aldermoor Close, Southampton, SO16 5ST. Geraldine Leydon, Principal Research Fellow.

16 Southampton General Hospital, Coxford Road, Southampton, SO16 6YD, Anindo Banerjee, Lead  
17 Chest Physician.  
18  
19

20 Correspondence to Lucy Brindle – [l.a.brindle@soton.ac.uk](mailto:l.a.brindle@soton.ac.uk)

21 Building 67, University Road, Southampton, SO17 1BJ. Phone: 02380 598526; Fax: 02380 597820.  
22  
23

24  
25 **Words**

26 Abstract: 247

27 Article: 4030  
28  
29  
30  
31  
32  
33  
34  
35  
36  
37  
38  
39  
40  
41  
42  
43  
44  
45  
46  
47  
48  
49  
50  
51  
52  
53  
54  
55  
56  
57  
58  
59  
60

## ABSTRACT

**Objectives:** To investigate why symptoms indicative of early-stage lung cancer (LC) were not presented to GPs and how early symptoms might be better elicited within primary care.

**Design, setting and participants:** A qualitative cross-sectional interview study about symptoms and help-seeking in 20 patients from 3 south England counties, awaiting resection of LC (suspected or histologically confirmed). Analysis drew on principles of discourse analysis and constant comparison to identify processes involved in interpretation and communication about symptoms, and explain non-presentation.

**Results:** Most participants experienced health changes possibly indicative of LC which had not been presented during GP consultations. Symptoms that were episodic, or potentially caused by ageing or lifestyle, were frequently not presented to GPs. In interviews, open questions about health changes/symptoms in general did not elicit these symptoms; they only emerged in response to closed questions detailing specific changes in health. Questions using disease-related labels, e.g. pain or breathlessness, were less likely to elicit symptoms than questions that used non-disease terminology, such as aches, discomfort or 'getting out of breath'. Most participants described themselves as feeling well and were reluctant to associate potentially explained, non-specific or episodic symptoms with LC, even after diagnosis.

**Conclusion:** Patients with early LC are unlikely to present symptoms possibly indicative of LC that they associate with normal processes, when attending primary care before diagnosis. Faced with patients at high LC risk, GPs will need to actively elicit potential LC symptoms not presented by the patient. Closed questions using non-disease terminology might better elicit normalised symptoms.

## Article Summary

### Article Focus:

- Why symptoms potentially indicative of lung cancer are not presented to GPs
- Exploration of how and why some lung cancer symptoms are normalised by lung cancer patients
- Use of discourse analysis to investigate communication factors involved in the non-presentation and normalisation of symptoms, and how symptoms might be better elicited in primary care.

### Key Messages:

- Non-specific, episodic and non-progressive symptoms were normalised by patients with operable lung cancer who felt well.
- Symptoms normalised by patients with operable lung cancer were not presented to GPs during consultations before diagnosis. GP elicitation of normalised symptoms would lead to better informed referral decisions.
- Closed questions using non-disease terminology were more effective at eliciting symptoms normalised by patients.

### Strengths and limitations of this study:

- This study used interviews to identify interactional factors which influenced symptom presentation within a research study, and it may be that symptom presentation occurs differently within everyday GP consultations; nonetheless our findings indicate that the symptoms normalised by patients within interviews were also the symptoms that consulting patients did not present to GPs. If these normalised symptoms were elicited by GPs, referral decisions would be better informed.
- Most lung cancer patients are diagnosed with inoperable disease and so any sample of patients diagnosed with operable lung cancer is unrepresentative of this patient population. However, research involving operable patients enables the investigation of communication about currently experienced early symptoms, rather than relying on retrospective accounts of early symptoms provided by patients with later stage disease. Furthermore, the reasons these patients gave for non-presentation of symptoms concur with other studies of help-seeking for cancer symptoms, supporting the transferability of our findings.

## Eliciting symptoms interpreted as normal by patients with early stage lung cancer – can we use closed questions to reduce delay in diagnosis?

### INTRODUCTION

Lung cancer is diagnosed too late in the UK and survival rates are lower than in most other Western European countries; [1-4] 86% are diagnosed at a stage when curative treatment is not possible and less than 25% survive one year following diagnosis. [5-6] Lung cancer kills approximately 30,000 people a year in the UK so even modest improvements in the time to diagnosis could dramatically improve health outcomes. [7] Despite successful national cancer screening programmes, most tumours are diagnosed following presentation with symptoms [8] so it is vital to identify patients with significant symptoms early. The UK National Institute of Clinical Excellence (NICE) recommends urgent chest x-ray for patients presenting with any 1 of 10 unexplained or persistent symptoms [9] but General Practitioners (GPs) have to balance risks associated with unnecessary x-ray against possible late diagnosis, and make judgements about the relative validity of alternative explanations for symptoms. This is further complicated by the fact that lung cancer is often preceded by chronic respiratory disease [10] making detection difficult.

Recent evidence [11] indicates that most newly diagnosed lung cancer patients do not recognise all of their cancer symptoms. Isolated single symptoms have low predictive value for lung cancer [12] but patients seldom present multiple symptoms to GPs. [13-14] Interview research has shown that lung cancer patients normalise symptoms and delay seeking help [15-16] and in the general population many symptoms are never presented to GPs [17-18]. However, patients diagnosed with lung cancer have been shown to report symptoms to their GP more frequently than controls 6-24 months before diagnosis [12] but it seems that a combination of cultural and communication processes combine, sometimes fatally, to prevent help-seeking [13,19-20] for the full range of symptoms experienced by patients at increased risk of lung cancer (LC). [11;21]

Previous studies have identified symptom normalisation - the association of symptoms with normal processes - as an important factor in delayed LC diagnosis. However, research has not yet addressed the reasons for normalisation of LC symptoms, or investigated how normalised symptoms that are not presented to health care professionals might be better elicited. Structured interviewing has been used in primary care to improve psychiatric diagnosis but it is not clear if it could help to elicit early lung cancer symptoms. Our study examined how symptoms were normalised by patients and compared structured and unstructured elicitation of symptoms. By using a discourse analytic approach we were able to suggest ways that health care professionals might better elicit normalised symptoms, and investigate why they are not presented to GPs.

### METHODS

#### Design

Previous studies have focused on inoperable lung cancer, but we were interested in how patients communicated early symptoms so we conducted interviews with patients awaiting surgical resection of lung cancer (suspected or histologically confirmed). Previous interview studies with lung cancer patients have relied upon retrospective accounts of early symptoms experienced before diagnosis. In contrast, we were interested in how patients communicate about, and negotiate the relevance of current early symptoms. In retrospective accounts patients might normalise symptoms to justify delays in seeking help so we also investigated the normalisation of symptoms that started following LC investigation. We used unstructured

1  
2  
3 followed by structured interviewing to find out if this could elicit symptoms more effectively  
4 than open questions about changes in health, which have been found not to elicit all lung  
5 cancer symptoms (see Smith et al, 2009).  
6

### 7 8 **Participants**

9 The interview sample for this study was drawn from 28 adult patients with a diagnosis of, or  
10 suspected of having, operable lung cancer (probable: >90% or histologically confirmed)  
11 recruited to a questionnaire development study. Patients were either approached by the  
12 researcher following their first consultation with participating thoracic surgeons at a South  
13 England Trust, or were sent a letter and information sheet by the surgical team. Seventeen  
14 out of twenty consecutive patients within 3 recruitment periods (07/2006-10/2007; 02/2008-  
15 05/2008; 02/2009-05/2009) approached by a researcher agreed to take part. An opportunistic  
16 sample of 11 participants was recruited by letter (within the three recruitment periods).  
17 Twenty eight patients in total were recruited and interviewed about their current and recent  
18 health and help-seeking behaviour.  
19

20  
21 This paper reports the analysis of 20 interviews with patients identified as having operable  
22 lung cancer at the end of the study period (data from seven interviewees who received a non-  
23 malignant diagnosis after the interview were analysed separately and are not reported here.  
24 One patient diagnosed with advanced disease was also excluded). Characteristics of these 20  
25 patients are given in Table 1.  
26

27 [Insert table 1 here]  
28

### 29 30 **Interviews**

31 The unstructured (first) section of the interview used open questions to generate narrative  
32 accounts of participants' experiences and changes in health status (See Appendix 1 for the  
33 interview checklist). Participants were asked to describe anything at all that they had noticed  
34 about their health, even if they thought it not relevant to their investigation for lung cancer.  
35 The second part of the interview was semi-structured and focused on duration and  
36 characteristics of symptoms, and reasons for seeking or not seeking help. The third part of the  
37 interview used closed questions to explore symptoms and help-seeking using a list of  
38 potential lung cancer symptoms compiled from Cancer Research UK [6] information, NICE  
39 [9] guidelines, and a previous interview study with lung cancer patients.[15] Field notes were  
40 recorded after the interview. Interviews lasted between 1-2 hours, took place in the  
41 participants' home (18/20) or a hospital setting (2), some involved the participant's partner  
42 (2) or carer (1), all were audio-recorded, transcribed verbatim, checked for accuracy and  
43 anonymised. An adapted version of Jefferson's transcription conventions [22] were used  
44 (described in Box 1).  
45

46  
47 [Insert Box 1 here]  
48

### 49 50 **Analysis**

51 The first stage of analysis involved an iterative coding process using elements of the constant  
52 comparative method to develop themes (initially identified by LB and checked by a second  
53 researcher, GL, who independently read a sample of transcripts and verified codes and  
54 themes). This iterative process continued until data saturation was achieved. All transcripts  
55 were revisited and deviant cases were sought.[23] [Thematic analyses identified symptoms not  
56 presented to GPs, characteristics of symptoms, and reasons given for non-presentation.](#)  
57 Discourse analysis [24-25] which considers language use in context, was used to [examine](#)  
58  
59  
60

1  
2  
3 how health changes were presented in patient-interviewer interactions; The discourse analysis was informed by ethnomethodology, an approach which focuses on how social action is accomplished within accounts. This enabled us to look at the implications of talk's sequential and micro-organisation for symptom presentation, and showed how normalised symptoms might be better elicited. We combined the thematic analysis and discourse analyses to explain normalisation and non-presentation of symptoms. The results section presents key findings about symptom presentation, including reasons for non-presentation, and the implications of question type and terminology.

## 16 RESULTS

17 Most participants described themselves as having good health; only four presented accounts  
18 of declining health preceding diagnosis, characterised by multiple symptoms and feeling  
19 unwell (see table 2).

20  
21 [Insert table 2 here]

22  
23 Symptomatic diagnosis occurred for 13 participants and 7 participants claimed not to have  
24 any lung cancer symptoms, describing incidental diagnoses made during the investigation of  
25 unrelated health problems, traumatic injury or screening (Table 3).

26  
27 [Insert link to table 3 here]

28  
29 15 participants described further changes in health possibly indicative of lung cancer  
30 (according to NICE Guidelines/CRUK symptom list) that were not thought a reason for  
31 concern and had not been presented to their GP during LC investigations, despite the  
32 presentation of the trigger symptom or use of primary care services for other reasons. They  
33 did not associate these un-investigated health changes with LC and they were elicited by  
34 closed questions about specific symptoms, but not by open questions about symptoms or  
35 changes in health (Table 3).

36  
37 Two types of symptom accounts were identified: 'symptoms as normal processes' and  
38 'symptoms of disease/concern'. Examples of these accounts and their elicitation are provided  
39 in table 4. Participants reported un-investigated symptoms, and produced normalised  
40 accounts of these, irrespective of patient socio-demographic characteristics, smoking status or  
41 route to diagnosis; there were no discernible differences in relation to table 1 characteristics.  
42 Exceptions appeared to arise only in the case of participants providing narratives of declining  
43 health. The association of symptom normalisation with narratives of good health is  
44 highlighted in table 3; those providing narratives of declining health tended not to normalise  
45 symptoms. Participants with incidental diagnoses also provided normalised accounts of un-  
46 investigated potential LC symptoms, but were less likely to produce symptom of concern  
47 accounts than those with symptomatic diagnoses (see table 3).

48  
49 The first results section – 'Reasons for non-presentation' – describes the main features of  
50 'symptoms as normal processes' accounts (episodic/non-progressive symptoms or ageing and  
51 lifestyle related explanations). 'Symptoms of concern' accounts are described in order to  
52 demonstrate exceptions to the normalisation of symptoms. The second results section

examines the use of closed questions to elicit (normalised) accounts of symptoms not elicited by open questions or presented to GPs, and the implications of symptom terminology.

### Reasons for non-presentation

Normal processes such as lifestyle and ageing were commonly used as explanations for not presenting symptoms to GPs. For example, breathlessness was frequently associated with being unfit, getting older, over-activity or seasonal changes rather than lung cancer:

P18: I just put it down to me being too unfit for that particular run or circuit or down to age...I didn't associate that with anything other than me being old or unfit, one of those.

In these 'symptoms as normal process' accounts patients portrayed symptoms as part of everyday life processes and avoided claiming cancer causation:

LB: ...do you get any discomfort anywhere, do you have any aches or pains?

P11: No (.) only round me neck but that's just recently it's come on. I don't know whether it's to do with this problem I've got ... I think it's a bit of arthritis there. And (.) you know (.) it's old age really I mean, because we do get these things I know, as you get older, (.) but just as I say this last couple of weeks it's got really really bad.

Some of those who described current 'good health' at odds with their diagnosis, also described episodic ill health, or long term symptoms which had led to lifestyle changes and adaptation. Symptoms like breathlessness or cough might be more severe during a chest infection, but were not commented on if they persisted. Here, P25 did not mention breathlessness on climbing the stairs to her GP:

P25: It was getting the pains in my hands and my wrists... It was when it started here [in wrists], it started to hinder me with things...but I wasn't going [to the GP] through breathlessness ...because that had finished when I got better...You know within the week I was back to being able to breathe again. Apart from when I you know whether you get out of breath carrying the Hoover upstairs... [Husband] says "What have you been doing? [ ]?" and I just say "Nothing just those stairs".

The ability to improve did not appear to fit with the expected progressive pattern for a disease such as lung cancer:

P25: [ ]...once I've had my antibiotics or a bit of an inhaler I'm fine again, like I am now... Why don't I feel really, really ill now to understand this? How can you have this and get better and feel better, get ill but then you get better, well how can you do that?

These normalised accounts, by simultaneously presenting alternative non-disease explanations, such as ageing, for health changes, also helped construct the participant as healthy. Exceptions to the use of normalised accounts for un-investigated symptoms were found in four interviews where patients had declining health (consisting of multiple symptoms and feeling unwell); two of these four patients also provided 'quest for diagnosis narratives' in which they had battled, or were still battling, for a diagnosis in the face of clinical ignorance or clinical delay. In the interviews they described most of their health changes in response to open questions (Table 3: Exceptions to the normalisation of symptoms), including symptoms not presented to GPs, and did not normalise these symptoms. Even symptoms presented in response to closed questions were most often not normalised:

LB: So have you noticed any changes in breathing or breathlessness?

- 1  
2  
3 P19: Yes I am definitely more breathless now... I am not normally that breathless!  
4 LB: ...and before that, how would you describe your breathlessness?  
5 P19: Well it's never been really too bad, as long as I've had my inhalers... So it's just recently that I  
6 am beginning to get a bit more breathless and I don't think that's associated with the asthma.  
7

8 Participants who presented themselves as well, normalised non-specific, non-progressive and  
9 episodic symptoms.

10 [Insert table 4 here]  
11

### 12 **Using closed questions to elicit symptoms not elicited by open questions**

13 Symptoms interpreted as normal by participants tended not to be described in response to  
14 open interview questions (Tables 3 & 4) and were not presented to GPs. For example, P22,  
15 who had been investigated by his GP for a bowel disorder in the weeks before diagnosis,  
16 described an absence of symptoms he associated with lung cancer:  
17

- 18  
19  
20 P22: No as I say this was a complete shock to find out that it was on the lung. As I said, we would  
21 never have known anything about it if I hadn't fallen off that thing. I suppose it would eventually with  
22 finding this I suppose I could have lost weight or gone awful thing one to the doctor "well we'll have  
23 to find out what's causing it" but no nothing.  
24

25 However when asked specifically about long-term cough, he revealed he had experienced a  
26 cough for 4-5 months:  
27

- 28 P22: Well I've got a cough now. Every now and again I cough and get a little phlegm up.  
29 LB: ... And is it something that you ever went to your doctor about?  
30 P22: No.  
31 LB: No.  
32 P22: No I've never had to do that.  
33

34 Accounts produced in response to closed interview questions about specific symptoms  
35 displayed two common structures for symptom reporting: 'Affirmation/Normalisation' and  
36 'Delayed Affirmation/Normalisation'. The symptom referred to by the interviewer might  
37 either be affirmed but normalised ('Affirmation/Normalisation') or initially denied and then  
38 normalised ('Delayed Affirmation/Normalisation'). When closed questions phrased health  
39 changes in ways which did not necessarily indicate disease, the participant was more likely to  
40 answer affirmatively, or describe a health change, but then suggest the symptom was normal  
41 and not related to lung cancer (Affirmation/Normalisation). In contrast, questions using  
42 disease-related terms - e.g. 'pain' - produced an immediate denial or pause (non-response)  
43 followed by normalisation (Delayed Affirmation/Normalisation):  
44

- 45  
46 LB: ... have you had any chest pain at all that you can describe?  
47 P12: No, not really. I mean as the cough's got shall we say more persistent and sort of shall we say  
48 worse yes (.) I can feel it a bit (.) but I mean I can't feel it now... if you look at the x-rays you  
49 think 'oh blimey!' but you wouldn't know it was there!  
50

51 Reformulation of the question, involving a shift from disease to non-disease terminology,  
52 could elicit normalised accounts of symptoms – as in these examples where a change in  
53 terminology shifting from 'pain' to 'aches' and 'discomfort', and shifting from  
54 'breathlessness' to 'not being able to get your breath' leads to elicitation of the symptoms:  
55

- 56 LR: Have you had any pain anywhere?  
57 P16: None at all. No  
58 LR: ...have you experienced any sort of aches or general sort of discomfort at all? ...  
59  
60



1  
2  
3 P16: No, not serious no. Well ...sometimes I have a  
4 feeling that something's going on, but it's not there all the time, you know  
5

6 LR: And have you experienced breathlessness? ((pause))

7 P18: ((intake of breath))

8 LR: Just feeling like you haven't been able to get your breath quite so easily?

9 P18: I would go up a couple of flights of stairs quite randomly, I would feel out of breath. I would  
10 never never usually be like that, so yes, for a fit guy I would go ooh I'm breathless ...but then  
11 you know I shouldn't have really bothered about it at all. But then again I have put on a slight  
12 bit of weight haven't I?  
13

14 In contrast with disease-related terminology, terminology not strongly associated with disease  
15 such as 'aches' or 'discomfort' rather than 'pain', produced affirmation and then  
16 normalisation (affirmation/normalisation):  
17

18 LB: And have you had any kind of aches or discomforts anywhere?

19 P12: Well I have been complaining about a stiff neck haven't I...and also this shoulder...but I mean  
20 I can play golf, so it's not that bad!  
21

22 Similarly the use of terms that imply 'breathing changes' or 'getting out of breath more  
23 easily', rather than 'breathlessness', produced an affirmation/normalisation response  
24 structure:  
25

26 LB: ...what about breathing changes, or have you ever noticed at all that you can become more  
27 breathless than you would have done say a few years ago when you were doing something?

28 P11: I do now. This past (.) oh couple of months I suppose. I get more breathless if I (.) if I hurry  
29 around too much you know...but normally you know, I don't run around! (LB: no no) If I  
30 remember my age... I don't sort of get out of (.) breathless or anything like that, it's only if I'm  
31 (.) ... overdo things really.  
32

33 Even though closed questions using disease-related terminology might elicit previously  
34 unmentioned health changes, closed questions using non-disease terminology did so more  
35 effectively.  
36

## 37 DISCUSSION

### 38 Eliciting 'hidden' symptoms

39 Most of our sample described themselves as feeling well, despite going on to have a  
40 diagnosis of operable lung cancer. Patients who felt well had experienced a range of health  
41 changes indicative of lung cancer but they did not tell their GPs about many of these, despite  
42 making use of primary care services. Instead they framed these symptoms as normal features  
43 of lifestyle and ageing processes.  
44

45 Delay in lung cancer diagnosis in the UK has been blamed upon patients' failure to recognise  
46 early symptoms.[26] However, our research indicates that normalised symptoms can be  
47 elicited by closed questions. This runs counter to current educational and communication  
48 practice which encourages open and expansive questioning. Whereas open questioning is  
49 necessary to elicit symptoms perceived as abnormal by the patient, normalised symptoms will  
50 remain hidden. Once elicited by closed questions, normalised symptoms are often quickly  
51 obscured within accounts which provide every day explanations for health changes. This  
52 means that interviewers (or health professionals) have to probe normalised accounts to  
53 uncover hidden symptoms.  
54  
55  
56  
57  
58  
59  
60

1  
2  
3 Questions using disease-related symptom terminology, such as ‘chest pain’, or  
4 ‘breathlessness’, appeared to have limited potential to elicit potential lung cancer symptoms  
5 experienced by those with operable lung cancer. Our analysis suggests that to get at these  
6 symptoms we need to ask closed questions without referencing disease-related symptom  
7 labels. Again this runs counter to some guidance such as the NICE referral criteria  
8 terminology which uses disease-related terms. Furthermore, contextual factors and framing of  
9 the patient’s presentation are known to influence GPs’ diagnostic reasoning;[27] patients who  
10 present themselves as well and without declining health might be less likely raise concern and  
11 be referred for investigation of potential cancer symptoms.  
12

13  
14 Recent survey research looking at public awareness of cancer symptoms in the UK,  
15 concluded that levels of knowledge are low for many potential cancer symptoms.[28] These  
16 findings have informed regional NAEDI (National Awareness and Early Diagnosis  
17 Initiatives) [29] materials designed to educate the public about cancer symptoms. It might be  
18 argued that participants in our study simply did not recognise the significance of symptoms  
19 such as breathlessness. However, participants did not report lack of knowledge as the reason  
20 for symptom normalisation and non-presentation. Furthermore, the accounts produced by  
21 participants avoided personal claims of lung cancer aetiology for changes in health, even if  
22 this was raised as a possibility in the interview. Alternative non-lung cancer explanations for  
23 symptoms were provided that had social legitimacy. Our work suggests that lists of  
24 symptoms alone are unlikely to prompt patients to reveal multiple non-specific and  
25 normalised symptoms, especially when they are asked to give unstructured accounts.  
26 Furthermore, our research indicates that lung cancer risk scores provided by symptom based  
27 clinical decision support aids (e.g. RATS[30]), are likely to be influenced by how symptoms  
28 are elicited within the consultation.  
29  
30

31  
32 Patient-centred medicine attempts to honour patients’ experiences and concerns – presented  
33 in their own terms. It has been accompanied by more open consultation styles and a shift  
34 away from interactions directed by the health professional. For patients with potential lung  
35 cancer this may not be the best way to elicit symptoms. Instead routine medical consultations  
36 involving those at increased cancer risk [31] might better be restructured to enable the  
37 presentation of health changes which appear normal or unproblematic to the patient. This  
38 would require the clinician to be aware of the risk of lung cancer in all patients presenting to  
39 their service with symptoms seemingly unrelated to lung cancer. The elicitation of  
40 normalised symptoms in patients at increased lung cancer risk might then facilitate GPs’  
41 chest x-ray referral decisions.  
42  
43

#### 44 **Strengths and Limitations**

45 This study used interviews to identify interactional factors which influenced symptom  
46 presentation within a research study. The systematic and in-depth study of language of the  
47 type reported in this article can lead to critical insights about conventions used in  
48 conversation that are transferable between settings.[32] However, it may be that symptom  
49 presentation occurs differently within everyday GP consultations; closed questions involving  
50 non-disease terminology might not be as effective at eliciting normalised symptoms within  
51 primary care practice. Further research involving GP consultations will be required to  
52 establish how effective these methods of symptom elicitation are within primary care.  
53 Nonetheless our findings indicate that the symptoms normalised by patients within interviews  
54 were also the symptoms that consulting patients did not present to GPs. If these normalised  
55 symptoms that are potentially indicative of LC were elicited by GPs, referral decisions would  
56 be better informed.  
57  
58  
59  
60

1  
2  
3  
4 The participant group were patients with an established or probable lung cancer diagnosis.  
5 This may influence symptom presentation in the interview as a LC diagnosis is already  
6 suspected. However, the normalisation of symptoms that started after diagnosis within this  
7 study suggests that normalisation is not justifying delays in diagnosis; the association of  
8 episodic, non-specific symptoms with normal processes appears commonplace for those  
9 feeling well, even when lung cancer provides a potential explanation for symptoms.  
10

11  
12 | NICE referrals guidelines [for suspected lung cancer](#) are based upon a weak evidence base;  
13 therefore, we do not know the likelihood that the symptoms not presented to GPs were caused  
14 by LC. However, these guidelines represent the best evidence currently available to inform  
15 referral for lung cancer investigation. If these non-specific symptoms experienced by  
16 patients at increased lung cancer risk were elicited in primary care, GPs would be better able  
17 to operationalize NICE guidelines. A prospective study may eventually determine the utility  
18 of these symptoms in the early diagnosis of lung cancer and the efficacy of treatment  
19 (including surgery).  
20

21  
22 The majority of lung cancer patients are diagnosed with inoperable disease and so any sample  
23 of patients diagnosed with operable lung cancer is necessarily unrepresentative of the whole  
24 population of lung cancer patients. It may be that our participants were more symptomatic in  
25 the early stages, or more likely to seek medical help, than those diagnosed with inoperable  
26 disease. However, this makes it all the more compelling that these participants still  
27 experienced a number of symptoms that they did not report. The reasons these patients with  
28 lung cancer give for non-presentation of symptoms concur with other studies of help-seeking  
29 for cancer symptoms,[19] supporting the transferability of our findings. Furthermore, our  
30 finding that those who reported good health tended to normalise nonspecific, episodic and  
31 non-progressive symptoms might have implications for improving earlier detection of other  
32 cancers where patients describe good health in the early stages, and for patient-clinician  
33 communication more generally.  
34

### 35 36 **Conclusions**

37 Even though lung cancer patients are more likely to attend their GP with potential symptoms  
38 in the year before diagnosis than healthy controls, our findings indicate that many non-  
39 specific symptoms are not presented within these consultations. The use of non-disease  
40 related symptom labels in combination with some closed questioning appears to improve  
41 symptom elicitation.  
42

43  
44 Eliciting and investigating normalised symptoms – to uncover the invisible part of the illness  
45 iceberg,[16-17] whilst not feasible for all patients attending primary care, would be possible  
46 for those identified as at increased lung cancer risk.[31]  
47

48  
49  
50 **Ethical approval:** NHS ethical approval was gained from Southampton South Central  
51 Research Ethics Committee (05/Q1702/46).  
52

53  
54 **Authorship:** All authors have commented on the first and final draft of the paper, and  
55 contributed to interpretation of the data. LB was the chief investigator; she had the original  
56 idea, designed the study, conducted interviews, analysed the data, and produced all drafts.  
57 CP also commented on the penultimate draft of the paper and edited the final draft. GL  
58  
59  
60

1  
2  
3 contributed to coding of the interview transcripts. AB also contributed to data collection. LB  
4 is the guarantor for the study.  
5

6 **Licence:** The Corresponding Author has the right to grant on behalf of all authors and does  
7 grant on behalf of all authors, a worldwide licence to the Publishers and its licensees in  
8 perpetuity, in all forms, formats and media (whether known now or created in the future), to  
9 i) publish, reproduce, distribute, display and store the Contribution, ii) translate the  
10 Contribution into other languages, create adaptations, reprints, include within collections and  
11 create summaries, extracts and/or, abstracts of the Contribution, iii) create any other  
12 derivative work(s) based on the Contribution, iv) to exploit all subsidiary rights in the  
13 Contribution, v) the inclusion of electronic links from the Contribution to third party material  
14 where-ever it may be located; and, vi) licence any third party to do any or all of the above.  
15  
16  
17

18 **Access to data:** All authors had access to the data and can take responsibility for the integrity  
19 of the data and the accuracy of the data analysis.  
20  
21

22 **Competing interest declaration:** "All authors have completed the Unified Competing  
23 Interest form at [www.icmje.org/coi\\_disclosure.pdf](http://www.icmje.org/coi_disclosure.pdf) (available on request from the  
24 corresponding author) and declare: LB had support from Research Councils UK for the  
25 submitted work; no financial relationships with any organisations that might have an interest  
26 in the submitted work in the previous 3 years; no other relationships or activities that could  
27 appear to have influenced the submitted work."  
28  
29

30 **Contributions:** Liz Roffe conducted some interviews. The structured section of the  
31 interview was based upon an interview schedule developed by Corner, Hopkinson,  
32 Fitzsimmons et al. (2005).  
33  
34

35 **Data Sharing:** Research participants have not given informed consent for data sharing; a  
36 complete qualitative data set cannot be anonymised adequately.  
37  
38

39 **Funding:** This research was funded by an RCUK (Research Councils UK) Post-Doctoral  
40 Fellowship awarded to Lucy Brindle to develop research to improve earlier lung cancer  
41 diagnosis (sponsor: Faculty of Health Sciences, University of Southampton - Jessica Corner).  
42

43 **Independence:** The funders (RCUK) had no influence on the design, conduct or reporting of  
44 this research.  
45  
46  
47

## 48 REFERENCES

49  
50 1 Laroche, C, Wells F, Coulden R, Stewart S, Goddard M, Lowry E, Price A, Gilligan D.  
51 Improving surgical resection rate in lung cancer. *Thorax* 1998;**53**:445-449.  
52  
53  
54  
55  
56  
57  
58  
59  
60

1  
2  
3 2 Coleman MP, Gatta G, Verdecchia A, Estève J, Sant M, Storm H, Allemani C, Ciccolallo  
4  
5 L, Santaquilani M, Berrino F. EUROCARE-3 summary: cancer survival in Europe at the end  
6  
7 of the 20th century. *Annals of Oncology* 2003; **14**(S5): v128-149.  
8  
9

10  
11 3 Richards M. EUROCARE-4 studies bring new data on cancer survival. *Lancet Oncol*  
12  
13 2007;**8**:752-753.  
14

15  
16 4 Imperatori A, Harrison RN, Leitch DN, Rovera F, Lepore G, Dionigi G, Sutton P,  
17  
18 Dominioni L. Lung cancer in Teesside (UK) and Varese (Italy): a comparison of management  
19  
20 and survival. *Thorax* 2006;**61**:232-239.  
21  
22

23  
24 5 ONS. Bulletin: Cancer Survival in England, 2005-2009 and followed up to 2010. 26<sup>th</sup> April  
25  
26 2012. [http://www.ons.gov.uk/ons/rel/cancer-unit/cancer-survival-rates/2005-2009-followed-](http://www.ons.gov.uk/ons/rel/cancer-unit/cancer-survival-rates/2005-2009-followed-up-to-2010/)  
27  
28 [up-to-2010/](http://www.ons.gov.uk/ons/rel/cancer-unit/cancer-survival-rates/2005-2009-followed-up-to-2010/) (accessed Aug 2012).  
29  
30

31  
32 6 Cancer Research UK. Cancer Help UK. Information service about cancer and cancer care.  
33  
34 [www.cancerhelp.org.uk/help/default.asp?page=2964](http://www.cancerhelp.org.uk/help/default.asp?page=2964) (accessed Aug 2012).  
35  
36

37  
38 7 Richards MA. The size of the prize for earlier diagnosis of cancer in England. *Br J Cancer*  
39  
40 2009;**101** (Suppl 2):S125-9.  
41  
42

43  
44 8 Hamilton W, Peters TJ. *Cancer Diagnosis in Primary Care*. Oxford: Churchill Livingstone,  
45  
46 2007: 1-200.  
47

48  
49 9 National Institute for Health and Clinical Excellence. The diagnosis and treatment of lung  
50  
51 cancer (update). (Clinical Guideline 121) 2011. <http://guidance.nice.org.uk/CG121>.  
52  
53  
54  
55  
56  
57  
58  
59  
60

1  
2  
3 10 Young RP, Hopkins RJ, Christma T, Black PN, Metcalf P, Gamble GD. COPD prevalence  
4 is increased in lung cancer independent of age, gender and smoking history. *Eur Respir J*.  
5  
6  
7 2009;**34**:380-386.

8  
9  
10  
11 11 Smith SM, Campbell NC, MacLeod U, Lee AJ, Raja A, Wyke S, Ziebland SB, Duff EM,  
12 Ritchie LD, Nicolson MC. Factors contributing to the time taken to consult with symptoms of  
13 lung cancer: a cross-sectional study *Thorax* 2009;**64**: 523-531.

14  
15  
16  
17  
18 12 Hamilton W, Peters TJ, Round A, Sharp D. What are the clinical features of lung cancer  
19 before the diagnosis is made? A population based case-control study. *Thorax* 2005;**60**:1059-  
20  
21  
22 1065.

23  
24  
25  
26 13 Heritage J, Robinson JD, Elliott MN, Beckett M, Wilkes M. Reducing Patients' Unmet  
27 Concerns: The difference one word can make. *J Gen Intern Med*. 2007;**22**:1429-33.

28  
29  
30  
31  
32 14 Barry CA, Bradley, CP, Britten, N, Stevenson, FA, Barber, N. Patients' unvoiced agendas  
33 in general practice consultation: Qualitative study. *BMJ* 2000; **320**: 1246-1250.

34  
35  
36  
37 15 Corner J, Hopkinson J, Fitzsimmons D, Barclay S, Muers, M. Is late diagnosis of lung  
38 cancer inevitable? Interview study of patients' recollections of symptoms before diagnosis.  
39  
40  
41  
42 *Thorax* 2005; **60**:314-319.

43  
44  
45 16 Tod AM. Allmark P. Craven J. Diagnostic delay in lung cancer: a qualitative study. *J Adv*  
46  
47  
48 *Nurs* 2007;**61**: 336-343.

49  
50  
51 17 Wadsworth M, Butterfield W, Blaney R. Health and sickness: the choice of treatment.  
52  
53  
54  
55  
56  
57  
58  
59  
60 London: Tavistock, 1971:1-114.

1  
2  
3 18 Scambler A, Scambler G, Craig D. Kinship and friendship networks and women's demand  
4  
5 for primary care. *Br J Gen Pract* 1981;**26**:746–750.  
6  
7

8  
9 19 Smith LK, Pope, C, Botha JL. Patients' help-seeking experiences and delay in cancer  
10  
11 presentation: a qualitative synthesis. *Lancet* 2005;**366**:825-831.  
12  
13

14 20 Andersen RS, Paarup B, Vedsted P, Bro F, Soendergaard J. 'Containment' as an analytical  
15  
16 framework for understanding patient delay: A qualitative study of cancer patients' symptom  
17  
18 interpretation processes. *Soc Sci Med* 2010;**71**:378-385.  
19  
20

21 21 Macleod U, Mitchell ED, Burgess C, Macdonald S, Ramirez AJ. Risk factors for delayed  
22  
23 presentation and referral of symptomatic cancer: evidence for common cancers. *Brit J*  
24  
25 *Cancer* 2009;**101** (suppl 2): S92-101.  
26  
27

28  
29 22 Jefferson G. Glossary of transcript symbols with an introduction. In: Lerner GH ed.  
30  
31 *Conversation Analysis: Studies From the First Generation*. Philadelphia: John Benjamins  
32  
33 Publishing Company, 2004: 13-23.  
34  
35

36  
37 23 Silverman D. Interpreting Qualitative Data, Methods for Analysing Text Talk and  
38  
39 Interaction. London: Sage Publications, 2001:1-323.  
40  
41

42  
43 24 Roberts C, Sarangi S. Theme oriented discourse analysis of medical encounters. *Med*  
44  
45 *Educ.* 2005;**39**:632–640.  
46  
47

48  
49 25 Roberts, C. What counts as discourse analysis and what use is it? *BMJ* 2008;**337**:a879.  
50  
51

52 26 Corner, J, Brindle L. The influence of social processes on the timing of cancer diagnosis: a  
53  
54 research agenda. *J Epidemiol Community Health.* 2011;**65**:477-82.  
55  
56  
57  
58  
59  
60

1  
2  
3 27 Stolper E, Van de Wiell M, Van Royen P, Van Bokhoven M, Van der Weijden T, Dinant  
4  
5 GJ. Gut feelings as a third track in general practitioners' diagnostic reasoning. *J Gen Intern*  
6  
7 *Med* 2011;**26**: 197-203.

8  
9  
10 28 Robb, K, Stubbings S, Ramirez A, Macleod U, Austoker J, Waller J, et al. Public  
11  
12 awareness of cancer in Britain: a population-based survey of adults. *Brit J Cancer* 2009;**101**  
13  
14 (suppl2):S18-23.

15  
16  
17 29 National Awareness and Early Diagnosis Initiative (NAEDI).  
18  
19 <http://info.cancerresearchuk.org/spotcancerearly/naedi/AboutNAEDI/> (accessed Aug 2012)  
20  
21

22  
23 30 Hamilton W. The CAPER studies: five case-control studies aimed at identifying and  
24  
25 quantifying the risk of cancer in symptomatic primary care patients. *Brit J Cancer* 2009;**101**  
26  
27 (suppl 2):S80-6.

28  
29 31 Cassidy A, Myles JP, Van TM Page RD, Liloglou T, Duffy SW, Field JK. The LLP risk  
30  
31 model: an individual risk prediction model for lung cancer. *Br J Cancer* 2008; **98**:270-276.  
32  
33

34  
35 32 Heritage J. The interaction order and clinical practice: Some observations on dysfunctions  
36  
37 and action steps. *Patient Educ Couns* 2011;**84**:338-43.  
38  
39  
40  
41  
42  
43  
44  
45  
46  
47  
48  
49  
50  
51  
52  
53  
54  
55  
56  
57  
58  
59  
60



**Box 1****Transcription Notation** (Simplified and adapted version of Jeffersonian transcribing conventions)

- The speaker is identified by a participant identifier (P1-P28) followed by a colon. The participant's partner is indicated by a P following the participant identifier e.g.:

P24P: No I don't agree

- Round brackets indicate that the material in the brackets is either inaudible, e.g.:

M: I ( ) that

Or there is doubt about its accuracy, e.g.:

M: I (couldn't tell you) that

- A micropause (a noticeable pause of less than 0.2 seconds) is indicated by a dot enclosed in brackets:

(.)

- Non-verbal activities and noticeable pauses of 0.2 seconds or more are indicated within double brackets:

M: Yes ((laughter)) but ((pause)) I don't know

- Square brackets indicate that material has been removed, usually to protect the participant's identity, e.g.:

[ ] or [town]

- Three consecutive dots indicates that a section of transcript has been removed:

M: He ran up the hill...to the house at the top

- Square brackets between adjacent lines of speech mark the start and end of overlapping talk

[ ]

| <b>Table 1</b>                                                                                                                                        |             |
|-------------------------------------------------------------------------------------------------------------------------------------------------------|-------------|
| <b>Patient characteristics (n=20)</b>                                                                                                                 |             |
| <b>Sex</b> (male/female)                                                                                                                              | 13/7        |
| <b>Age – years</b> (median; range)                                                                                                                    | 71.5; 41-86 |
| 40-49                                                                                                                                                 | 1           |
| 50-59                                                                                                                                                 | 1           |
| 60-69                                                                                                                                                 | 6           |
| 70-79                                                                                                                                                 | 10          |
| >=80                                                                                                                                                  | 2           |
| <b>Diagnosis</b>                                                                                                                                      |             |
| Incidental                                                                                                                                            | 8           |
| Symptomatic                                                                                                                                           | 12          |
| <b>Smoking status</b>                                                                                                                                 |             |
| Current smoker                                                                                                                                        | 4           |
| Ceased in the last 3 months                                                                                                                           | 4           |
| Former smoker (ceased >3 months ago)                                                                                                                  | 11          |
| Never smoker                                                                                                                                          | 1           |
| <b>Comorbidities:</b>                                                                                                                                 |             |
| Symptomatic COPD (spirometry +ve or clinical diagnosis)                                                                                               | 8           |
| Primary/Secondary Care COPD diagnosis (primary care diagnosis preceding 2ndry care LC investigation/diagnosis during secondary care LC investigation) | 3/5         |
| Asthma                                                                                                                                                | 5           |
| Ischaemic Heart Disease                                                                                                                               | 1           |
| Congestive cardiac failure                                                                                                                            | 1           |
| Other cardiac Problems                                                                                                                                | 2           |
| <b>Socioeconomic status</b> (Index of Multiple Deprivation):                                                                                          |             |
| Most deprived 50%                                                                                                                                     | 8           |
| Least deprived 50%                                                                                                                                    | 12          |

**Table 2: Accounts of general health**

|             | <b>Feeling well despite symptoms</b>                                                                                                                                                                                                                                                                                                                                                                                                                                                                                                                                                                                                                                                                                                                                                                                      |
|-------------|---------------------------------------------------------------------------------------------------------------------------------------------------------------------------------------------------------------------------------------------------------------------------------------------------------------------------------------------------------------------------------------------------------------------------------------------------------------------------------------------------------------------------------------------------------------------------------------------------------------------------------------------------------------------------------------------------------------------------------------------------------------------------------------------------------------------------|
| <b>P7</b>   | <p>LR: But you have had these headaches. Um. Would you say you've been feeling generally unwell?</p> <p>P7: Not really</p> <p>P7P: I don't know if you're feeling unwell</p> <p>P7: No. Just odd now and again.</p>                                                                                                                                                                                                                                                                                                                                                                                                                                                                                                                                                                                                       |
| <b>P10</b>  | <p>P10: I mean I've been quite healthy (.) I've got high blood pressure I mean I've had that ooh [&gt;20 years]... so that's all fairly long going you know but I haven't had any actual illnesses or anything</p>                                                                                                                                                                                                                                                                                                                                                                                                                                                                                                                                                                                                        |
| <b>P11</b>  | <p>P11: I didn't feel anything was wrong inside. I mean I had no inkling at all. Um. If I had had that x-ray, but I wouldn't have known because I (.) there was (.) I felt quite well really, it was only just you know this operation on my neck</p>                                                                                                                                                                                                                                                                                                                                                                                                                                                                                                                                                                     |
| <b>P16</b>  | <p>P16: When I had the cough you know she said they'd picked up the shadow...I probably sat there for a few seconds you know trying to take it in but that wasn't, when she said that I didn't get the feeling then that there was something wrong (LR: No) because as far as I knew I hadn't got anything wrong with me, but it's so there you are.</p>                                                                                                                                                                                                                                                                                                                                                                                                                                                                  |
| <b>P25</b>  | <p>P25: I was ill a lot last year but when I was taken into hospital and the antibiotics and the treatment I had and the months rest I had when I came home where I wasn't going to work (since then I've cut my hours down) I feel so well. But I honestly was not expecting anything like that to be said to me, because I feel so much better than I did last year... In fact I feel better now at the moment than I have done for a long time...you see once I've had my antibiotics or a bit of an inhaler I'm fine again, like I am now. So at the moment, I feel so much better that I think it's not making any sense to me.</p>                                                                                                                                                                                  |
|             | <b>Exceptions to feeling well despite symptoms – declining health</b>                                                                                                                                                                                                                                                                                                                                                                                                                                                                                                                                                                                                                                                                                                                                                     |
| <b>P17</b>  | <p>P17: About a year ago. "What's that? What's going wrong with me" you know and I was going like that. Everything goes tonta... feels as though I can't breathe you know and then I'd just (indicates short breaths) only for a second, and then it's gone and then I'd go back to breathing and everything like that, ... And that was about a year ago, that's when I noticed "[ ], there's something wrong with you".</p>                                                                                                                                                                                                                                                                                                                                                                                             |
| <b>P19:</b> | <p>LB: How would you describe how you feel now?</p> <p>P19: Not perfect. No. I mean I'm tired now. This made me tired! That's shows you how and it wouldn't normally do that!</p>                                                                                                                                                                                                                                                                                                                                                                                                                                                                                                                                                                                                                                         |
| <b>P20:</b> | <p>P20: And it was afterwards I was thinking I shall be able to get back on me feet now but instead I seem to be going on a slow decline. And I started to lose weight and like I said, things started tasting funny and all this, and I'm saying "Ok". And then I'd have a cold and this cough that wouldn't go away and to be honest I used to be coughing nearly all the time and it was like having a cold 24 hours a day, seven days a week. I'd start to get really tired and as I say, I was quite busy on Tuesday and I was throwing out rubbish... and then I cleaned all me windows. And yesterday, I felt like I'd been run over by a ten ton truck! And I thought 'well this is not me' It's just not me...maybe it's mental, you know, your own brain saying 'your body's not very well, just slow down'</p> |
| <b>P26</b>  | <p>P26P: This last year she's deteriorated in many things.</p> <p>P26: Well I think you can understand it though.</p> <p>P26P: That's geriatrics for you isn't it?</p> <p>P26: No it isn't you can understand it, when you've had a cough for this long. I mean it really takes it out of you, it really does. You try explaining that to the doctor!</p>                                                                                                                                                                                                                                                                                                                                                                                                                                                                 |

**Table 3: Patient reported symptoms and triggers to diagnosis**

| Participant                                                                                                                                                         | Triggers to diagnosis                                       | Symptoms of concern/disease (Elicited by open questions except where indicated)                                                                           | Symptoms as normal processes (Elicited by closed questions except where indicated)                              |
|---------------------------------------------------------------------------------------------------------------------------------------------------------------------|-------------------------------------------------------------|-----------------------------------------------------------------------------------------------------------------------------------------------------------|-----------------------------------------------------------------------------------------------------------------|
| <b>Symptomatic Diagnoses</b>                                                                                                                                        |                                                             |                                                                                                                                                           |                                                                                                                 |
| 06                                                                                                                                                                  | Severe cough > 3 weeks                                      | Severe productive cough (3-4 times a year of 2 days duration, for 5 years.)                                                                               | Increase in breathlessness, Fatigue                                                                             |
| 08                                                                                                                                                                  | Weight loss                                                 | weight loss                                                                                                                                               | <sup>1</sup> Weight loss – some weight now regained ( <b>open question</b> )                                    |
| 12                                                                                                                                                                  | Persistent cough; haemoptysis                               | Persistent, tickly, non-productive, mild cough; haemoptysis                                                                                               | Aches and discomfort: Stiff neck and left shoulders; weight loss; some discomfort with coughing as time went on |
| 016                                                                                                                                                                 | Cough; fatigue; feeling unwell; appetite loss; weight loss. | Appetite loss; weight loss - returned to normal; dry cough; feeling unwell                                                                                | Increase in breathlessness; a feeling (not pain) “that something is going on’ in the chest”; fingers go numb.   |
| 018                                                                                                                                                                 | Chest infection; haemoptysis                                | Repeated cough; chest infections; regular sneezing and flu like symptoms; sore throat; fatigue; Sore testicles; flushing across stomach; ache across back | Increase in breathlessness; pain in centre of chest; occasional coughing with chest infection                   |
| 023                                                                                                                                                                 | Weight loss; anaemia                                        | Flu and a scratchy dry cough; night sweats; weight loss; anaemia; tiredness; sensitive gums; soft hair; taste change ( <b>closed question</b> )           | Twinges in fingers and hands                                                                                    |
| 024                                                                                                                                                                 | Haemoptysis; Dyspnea                                        | Haemoptysis; night sweats                                                                                                                                 | Cough; breathlessness and wheezing.                                                                             |
| 025                                                                                                                                                                 | Dyspnea                                                     | Pains in legs and joints; fatigue, breathlessness                                                                                                         | Chest pain recently when lying down.                                                                            |
| 027                                                                                                                                                                 | Dyspnea                                                     | Breathlessness on exertion                                                                                                                                | Occasional hot shooting pain in chest                                                                           |
| <b>Exceptions to the normalisation of symptoms not presented to GPs/elicited by closed questions: Decline narratives (D) and Quest for Diagnosis narratives (Q)</b> |                                                             |                                                                                                                                                           |                                                                                                                 |
| 017 (D)                                                                                                                                                             | Chest/abdominal pain                                        | Aching pain from indigestion; cough; pain across shoulders; aches; having less energy; breathlessness on resting/panic attacks                            |                                                                                                                 |

|                             |                                                                        |                                                                                                                                                                                                                                                                                                |                                                                                                      |
|-----------------------------|------------------------------------------------------------------------|------------------------------------------------------------------------------------------------------------------------------------------------------------------------------------------------------------------------------------------------------------------------------------------------|------------------------------------------------------------------------------------------------------|
|                             |                                                                        | <b>Elicited by closed questions:</b> breathlessness on walking and when lying down                                                                                                                                                                                                             |                                                                                                      |
| 019<br>(D)                  | Anaemia                                                                | Sickness if over eat; bleeding in throat and vomiting large amounts of blood (now stopped).<br><b>Elicited by closed questions:</b> Pain in stomach; loss of appetite; tiredness; increase in breathlessness; pain in chest when breathing in.                                                 |                                                                                                      |
| 020<br>(D and Q)            | Persistent cough                                                       | Weight loss; fatigue; taste change; hot and cold sweats; reduction in appetite ( <b>closed question</b> )                                                                                                                                                                                      | breathlessness on physical activity; weight loss - some weight now regained ( <b>open question</b> ) |
| 026<br>(D and Q)            | Persistent cough; recurrent chest infections for the last 10 years.    | Regular chest infections and productive coughs; recent weight loss; cough triggered by eating, talking and cold air; dullish ache in back; coughing up occasional flecks of blood; fatigue and energy loss; night sweats – started at menopause but now every night ( <b>closed question</b> ) |                                                                                                      |
| <b>Incidental Diagnoses</b> |                                                                        |                                                                                                                                                                                                                                                                                                |                                                                                                      |
|                             | <b>Triggers to diagnosis</b>                                           | <b>Symptoms of concern/disease</b><br>(Elicited by open questions)                                                                                                                                                                                                                             | <b>Symptoms as normal processes</b> (Elicited by closed questions)                                   |
| 03                          | CXR following traumatic injury                                         | Gradually increasing breathlessness not noticed until diagnosis.                                                                                                                                                                                                                               | Weight loss                                                                                          |
| 07                          | Routine CXR on hospital admission                                      |                                                                                                                                                                                                                                                                                                | Fatigue                                                                                              |
| 010                         | Routine CXR on hospital admission                                      |                                                                                                                                                                                                                                                                                                | Change in bowel movements, fatigue                                                                   |
| 011                         | CXR Investigation of increased heart rate following surgery            |                                                                                                                                                                                                                                                                                                | Breathlessness; aches and pain back of left shoulder under arm and side of chest; fatigue            |
| 021                         | CXR investigation of weight loss and anaemia detected by health screen | Anaemia                                                                                                                                                                                                                                                                                        | Weight loss                                                                                          |
| 022                         | CXR following traumatic injury                                         |                                                                                                                                                                                                                                                                                                | Cough; taste change; bowel changes                                                                   |
| 028                         | Imaging of kidney to investigate haematuria                            | Chest infection following investigation for LC                                                                                                                                                                                                                                                 | Breathlessness                                                                                       |

<sup>1</sup>Occasionally participants would provide a symptom of concern/disease account when describing previous help-seeking, but would then reinterpret and normalise the symptom if it had improved since seeking help.

**Table 4: Comparison of ‘Symptoms of Concern’ and ‘Symptoms as Normal Processes’ accounts**

|            | Symptoms of Concern/Disease accounts                                                                                                                                                                                                                                                                                                                                                                                                                                                                                                                                                                                                        | Symptoms as Normal Processes accounts                                                                                                                                                                                                                                                                                                                                                                                                                                                                                                                                                                                                                                                                                                                           |
|------------|---------------------------------------------------------------------------------------------------------------------------------------------------------------------------------------------------------------------------------------------------------------------------------------------------------------------------------------------------------------------------------------------------------------------------------------------------------------------------------------------------------------------------------------------------------------------------------------------------------------------------------------------|-----------------------------------------------------------------------------------------------------------------------------------------------------------------------------------------------------------------------------------------------------------------------------------------------------------------------------------------------------------------------------------------------------------------------------------------------------------------------------------------------------------------------------------------------------------------------------------------------------------------------------------------------------------------------------------------------------------------------------------------------------------------|
| <b>P6</b>  | <p>LR: ...how [do] you think it all sort of started?</p> <p>P6: ... we went merrily on our holiday, and the cough just got worse and worse and worse. Coughing 24 hours a day the whole of the five days we were away...I went to see a doctor [who prescribed antibiotics] ...the antibiotics didn't touch it at all, so when we came back, I went to see one of my own doctors and he said 'you've probably got a chest infection. I'll give you some more antibiotics'... 'if at the end of seven days it hasn't gone, then I think you'd better go and get an x-ray'.</p>                                                               | <p>LR: OK. So cough, we've done. Breathlessness?</p> <p>P6: ... That [the pacemaker] cured it...so at the moment I'm just left with the cough or whatever...</p> <p>LR: So the only times you get breathless really are then when you're coughing?</p> <p>P6: Yeah.</p> <p>LR: Do you notice (.) is there any other time now</p> <p>P6: Occasionally I get breathless walking up hill, but that's to be expected.</p> <p>P6P: And you did a bit Friday which was stress I think.</p> <p>P6: Yeah, Friday...It does occasionally happen when I'm sitting down ... Up to recently I've been playing golf twice a week, so there can't be an awful lot wrong with me, but I do get occasionally short of breath...Just suddenly start breathing rather rapidly</p> |
| <b>P12</b> | <p>LB: Do you want to just tell me how you came to be in Mr [ ] clinic and what were the events that</p> <p>[ ]</p> <p>P12: yes. I had a particularly persistent cough that wouldn't go away...although it was literally just a sort of a clearing the throat, that sort of thing... [then] I woke in the middle of the night with a cough, my mouth filled with what I thought was catarrh, went to the basin, spat it out (.) blood bright red and dark red. And it bled for about 10 or 15 minutes...and it hasn't bled since... Anyway, Monday ... went to see GP... immediately gave me the ticket to go to the walk in x-ray [ ].</p> | <p>LB: Have you lost any weight at all?</p> <p>P12: A bit, mm. I would say less than half a stone</p> <p>P12P: We have a very active cruise, we do a lot of walking and sightseeing...</p> <p>P12: And then you know, we go to [UK holiday destination] most years. And we walk a tremendous amount. And I swim a lot there, don't I? So that's a very active holiday.</p>                                                                                                                                                                                                                                                                                                                                                                                      |
| <b>P16</b> |                                                                                                                                                                                                                                                                                                                                                                                                                                                                                                                                                                                                                                             |                                                                                                                                                                                                                                                                                                                                                                                                                                                                                                                                                                                                                                                                                                                                                                 |

|                   |                                                                                                                                                                                                                                                                                                                                                                                                                                                           |                                                                                                                                                                                                                                                                                                                                                                                                                                                                                                                                                                                                                                                                                                                                                                                                                                                                          |
|-------------------|-----------------------------------------------------------------------------------------------------------------------------------------------------------------------------------------------------------------------------------------------------------------------------------------------------------------------------------------------------------------------------------------------------------------------------------------------------------|--------------------------------------------------------------------------------------------------------------------------------------------------------------------------------------------------------------------------------------------------------------------------------------------------------------------------------------------------------------------------------------------------------------------------------------------------------------------------------------------------------------------------------------------------------------------------------------------------------------------------------------------------------------------------------------------------------------------------------------------------------------------------------------------------------------------------------------------------------------------------|
|                   | <p>P16: I developed a cough and also that I didn't feel very well and I'd also lost some weight. I went to the doctors ... [s/he] sent me for a blood test and an x-ray. And several days later [s/he] rang and said I want to see you and by this time I'd got my appetite back and my weight had come back up again...</p>                                                                                                                              | <p>P16 : I think perhaps if it had just been a cough, perhaps I wouldn't have bothered ...<br/> P16P: ... after you were feeling better, you'd put weight back on and you'd still got this funny cough, I think you could have gone on for months with that funny cough<br/> [ ]...<br/> P16: LR: have you experienced any breathlessness at all? ((pause)) Or sort of thing like you<br/> [ ]<br/> P16: I play golf and parts of the course are a bit steep and I must admit I get a bit puffed going up there but yeah it's not serious I just got to take it easy... as you get older so you can't do the things you did when you were a bit younger so ...quite often you put things down to change of your age and lifestyle and it wasn't that significant...I really wouldn't say I get breathless, I mean you [participant's wife] couldn't keep up with me.</p> |
| <p><b>P23</b></p> | <p>P23: and then we got to Christmas, and we were partying etc and to be quite honest, I should have put on more weight than I did. So I started to think 'well what's going on?' About [ ] months ago I had a colonoscopy and had a few polyps removed etc...I started to get night sweats, totally different from hot flushes...so I thought 'oooh this is a bit odd'.</p>                                                                              | <p>LB: Have you suffered from any backache or shoulder ache?<br/> P23: No.<br/> LB: Anything that you thought might be something else wrong?<br/> P23: I've had perhaps the odd twinge [in fingers] that I would put down to arthritis while doing the garden or something but – this is the annoying fact, I am quite healthy; well I think I'm quite healthy, and so no I wouldn't say I've had aches and pains.</p>                                                                                                                                                                                                                                                                                                                                                                                                                                                   |
| <p><b>P24</b></p> | <p>P24: I started coughing up blood and I was already at Dr [ ]'s clinic and when I told [ her ] I was coughing up blood, s/he referred me to the chest clinic which is next to Oncology, so that made me feel a bit suspicious... By that time I was admitted to hospital because I was coughing up what I thought was a lot of blood, and I had a lot of problem breathing... Dr [ ] came over to see ...and he changed my inhalers and took me off</p> | <p>LB:...when you were having breathing problems, did you ever have any wheezing with it?<br/> P24: Oh I do wheeze a bit in bed now. It's just you get used to the noises that your chest makes don't you really? I just think 'oh shut up'. I mean I do sleep very, very well unless I'm depressed...Sometimes just when I lie down I'll wheeze a bit and that's obviously changing from upright</p>                                                                                                                                                                                                                                                                                                                                                                                                                                                                    |

|            |                                        |                                                                                                                                                                                                                                                                                                                                                                                                                                                                                                                                                                                                                                                                                                                                                                                                                                              |
|------------|----------------------------------------|----------------------------------------------------------------------------------------------------------------------------------------------------------------------------------------------------------------------------------------------------------------------------------------------------------------------------------------------------------------------------------------------------------------------------------------------------------------------------------------------------------------------------------------------------------------------------------------------------------------------------------------------------------------------------------------------------------------------------------------------------------------------------------------------------------------------------------------------|
|            | beta blockers and transformed my life! | position to lying down but and not to any extent.                                                                                                                                                                                                                                                                                                                                                                                                                                                                                                                                                                                                                                                                                                                                                                                            |
|            | <b>Incidental Diagnosis</b>            |                                                                                                                                                                                                                                                                                                                                                                                                                                                                                                                                                                                                                                                                                                                                                                                                                                              |
| <b>P3</b>  |                                        | <p>LR: Er, so have you had any weight loss at all?</p> <p>P3: Yes. The lady [ ] that dances with me, she's been making off for months now that I'm losing weight.</p> <p>LR: Yeah?</p> <p>P3: Yeah. So I expect to lose weight in the summer months because you're more active over the allotments. ... plus the days are longer so you spend longer away from home so you don't eat so much, but I used to be [ ] stone, but when she weighed me yesterday with my clothes on, she said I was [1.5 stones less]</p> <p>LR: ...you think that's just over the summer or ?</p> <p>P3: I reckon that's over the last two years.</p> <p>LR: Yeah?</p> <p>RES: Yeah. I reckon about the last two years, because I always said [1.5 stone heavier than current weight ] stones is too heavy for me. And then people would say it's a beer gut</p> |
| <b>P28</b> |                                        | <p>LB: Have you had any other types of cough that have lasted more than three weeks?</p> <p>P28: No.</p> <p>LB: No. Would you say you had a smokers cough...</p> <p>P28: No I wouldn't actually! Would you? No.</p> <p>P28P: Not really.</p> <p>P28: No, never hacking coughs or anything.</p> <p>P28P: not a dry cough like ( )</p> <p>LB: Sorry you didn't have a dry cough?</p> <p>P28P: No. No. ((pause)) No more than a lot of people have got you know. In the day and you know</p>                                                                                                                                                                                                                                                                                                                                                    |



## APPENDIX 1 (Web Only File)

### Interview topic guide: IPCARD Chest Symptoms Study

- I. +II. **Unstructured and Semi-structured interview:**
- Record patient's health and illness experiences
  - Focussing on the period leading up to their referral for LC Investigation and all experiences of health and illness during the last 2 years, explore:
    - participants' interpretations of and explanations for symptoms
    - Impact of ill health/symptoms
- III. **Structured interview:**
- Explore list of specific symptom presentations and health changes (attached).
- IV. **Further semi-structured interview questions:** Help-seeking behaviour and use of health services (These questions are to follow accounts of symptoms elicited in sections I, II and III):
- What did you do about [symptom/health change]?
    - any health care, treatments, information or advice received
    - reasons for seeking or not seeking medical help.

### Introduction

“Thank you for agreeing to this interview. It should take about 60-90 minutes to complete. If at any time, you wish to stop or have a break, please let me know. If you want any questions repeated or clarified, please ask. I would like to build up a detailed picture of your experiences of health and illness. I am interested in anything that you noticed about your health even if you thought it was minor or not connected to your recent visit to [hospital/clinic]. I will then be asking you to talk in more detail about your experiences of health from when you first noticed a change in your health up to the time when you were referred to the [clinic] and about all aspects of your health in the last 2 years.”

### Section I

The topic guide provides a number of questions which the interviewer might use to initiate discussion about a particular topic. However, the interviewer might revise the questions, or alter their order, in light of the interviewee's response to earlier questions.

#### Part 1: Exploration of health and illness

Purpose: To explore the participant's experiences of health and illness over their lifetime including any symptoms/problems/changes in health that they have noticed in the last 2 years.

- Could you tell me how you came to be in Dr [ ]'s clinic/ came to be seeing Dr X
- Please tell me about your health and any illnesses that you have experienced

- How has your health changed (are there any changes that you noticed)?

## Section II

- When did you first notice something was wrong, or a there had been a change in your health?
- Have you experienced any other changes in your health during the last 2 years?

Prompts: use following prompts to aid recall of dates:

- o What year was this?
- o What month was this?
- o What season was this?
- o What it close to an event in the year, such as Christmas or Easter?
- o Was this at the same time as any other event in your life?
- o Was this at the same time as any family/ social event?
- o What else was going on in your life at the time?
- Has there been anything else that you have visited your doctor about during the last 2 years?
- Has there been anything else at all relating to your health that you have noticed during the last 2 years even if minor?

Probes: for all illnesses explore:

- o Severity
- o Duration
- o Change over time/how/when (use same probes as for Part 1)
- o Impact (social/lifestyle/ family/psychological/ what did the participant think about their symptom)
- o Participant's explanations for illness/associated with?/causes

## Section III

"I have a list of things that some people notice before they are told that they have a chest problem. I am going to ask you if you experienced each of these things. I will then ask you about each health change that you experienced in more detail."

- |                                                                                                    |                                                |
|----------------------------------------------------------------------------------------------------|------------------------------------------------|
| 01. Cough                                                                                          | YES NO (see structured guide - cough)          |
| 02. Coughing up blood                                                                              | YES NO (see structured guide - haemoptysis)    |
| 03. Breathlessness or panic attacks                                                                | YES NO (see structured guide - breathlessness) |
| 04. Changes in eating, appetite, taste or weight                                                   | YES NO (see structured guide – eating/weight)  |
| 05. Pain                                                                                           | YES NO (see structured guide - pain)           |
| 06. Discomfort or strange sensations                                                               | YES NO (see structured guide – discomfort)     |
| 07. Aches or pain in chest, back, shoulders or joints<br>(if not mentioned in response to 5 and 6) | YES NO (see structured guide – specific aches) |
| 08. Skin changes                                                                                   | YES NO (see structured guide – skin)           |
| 09. Lots of infections                                                                             | YES NO (see structured guide - infections)     |

|                                 |                                               |
|---------------------------------|-----------------------------------------------|
| 10. Tiredness                   | YES NO (see structured guide – tiredness)     |
| 11. Feeling generally unwell    | YES NO (see structured guide – unwell)        |
| 12. Hot or cold sweats          | YES NO (see structured guide – sweats)        |
| 13. Voice changes or hoarseness | YES NO (see structured guide – voice changes) |
| 14. Other (DESCRIBE) -----      | YES NO (see generic guide – other)            |

Information: Turn to relevant problems identified by participant. Only sections relating to the problems/changes identified by the should be completed

#### Section IV

**Semi-structured interview: Help-seeking behaviour and use of health services** (These questions follow accounts of symptoms elicited in sections I, II and III, and do not necessarily come at the end of the interview):

- What did you do about the symptom?

##### Prompts

- Confided in close family member/friend– who did you talk to first?/who else did you speak to
  - Found information (Read health related article in magazine or book, Consulted a medical dictionary/encyclopaedia, watched a health related TV/Video, Undertook an internet search),
  - Sought advice (e.g .Sought advice from NHS direct/ walk-in centre, Spoke to practice nurse/other health professional, Spoke to your GP/made appointment to see GP)
  - Treatment (other than GP advised) Took over the counter medication (self-prescribed or pharmacist consulted), Took complementary medicine/ therapy
- Why was that, what was it about your [symptom] that made you do /see X/not seek help?
  - What happened when you did X?
  - Have you done anything further about/received any further medical care /help with [symptom] since X?
    - If further help was sought - what made you seek this help?
  - Please describe any changes in the way you manage or live with the [symptom] since X

Relationship with GP and barriers to use of primary care services

- Have there been any circumstances in which you were unsure about whether to seek help from your GP?

- 1
  - 2
  - 3
  - 4
  - 5
  - 6
  - 7
  - 8
  - 9
  - 10
  - 11
  - 12
  - 13
  - 14
  - 15
  - 16
  - 17
  - 18
  - 19
  - 20
  - 21
  - 22
  - 23
  - 24
  - 25
  - 26
  - 27
  - 28
  - 29
  - 30
  - 31
  - 32
  - 33
  - 34
  - 35
  - 36
  - 37
  - 38
  - 39
  - 40
  - 41
  - 42
  - 43
  - 44
  - 45
  - 46
  - 47
  - 48
  - 49
  - 50
  - 51
  - 52
  - 53
  - 54
  - 55
  - 56
  - 57
  - 58
  - 59
  - 60
- What things have made you decide against visiting your GP/practice nurse?
  - Have there been any other circumstances in which attending your GP would have been difficult?
    - What were these?

For peer review only

**Eliciting symptoms interpreted as normal by patients with early stage lung cancer – could GP elicitation of normalised symptoms reduce delay in diagnosis?: Cross sectional interview study**

Lucy Brindle, Catherine Pope, Jessica Corner, Geraldine Leydon, Anindo Banerjee

Faculty of Health Sciences, University of Southampton, Building 67, University Road, Southampton, SO17 1BJ. Phone: 02380 598526; Fax: 02380 597820. Lucy Brindle, Improving Earlier Diagnosis Research Group Lead.

Faculty of Health Sciences, University of Southampton, Building 67, University Road, Southampton, SO17 1BJ. Catherine Pope, Professor of Medical Sociology.

Faculty of Health Sciences, University of Southampton, Building 67, University Road, Southampton, SO17 1BJ. Jessica Corner, Head of Faculty of Health Sciences.

Department of Primary Medical Care, University of Southampton, Aldermoor Health Centre, Aldermoor Close, Southampton, SO16 5ST. Geraldine Leydon, Principal Research Fellow.

Southampton General Hospital, Coxford Road, Southampton, SO16 6YD, Anindo Banerjee, Lead Chest Physician.

Correspondence to Lucy Brindle – [l.a.brindle@soton.ac.uk](mailto:l.a.brindle@soton.ac.uk)

Building 67, University Road, Southampton, SO17 1BJ. Phone: 02380 598526; Fax: 02380 597820.

**Words**

Abstract: 247

Article: 4030

1  
2  
3 ABSTRACT  
4

5 **Objectives:** To investigate why symptoms indicative of early-stage lung cancer (LC) were  
6 not presented to GPs and how early symptoms might be better elicited within primary care.  
7

8 **Design, setting and participants:** A qualitative cross-sectional interview study about  
9 symptoms and help-seeking in 20 patients from 3 south England counties, awaiting resection  
10 of LC (suspected or histologically confirmed). Analysis drew on principles of discourse  
11 analysis and constant comparison to identify processes involved in interpretation and  
12 communication about symptoms, and explain non-presentation.  
13  
14

15 **Results:** Most participants experienced health changes possibly indicative of LC which had  
16 not been presented during GP consultations. Symptoms that were episodic, or potentially  
17 caused by ageing or lifestyle, were frequently not presented to GPs. In interviews, open  
18 questions about health changes/symptoms in general did not elicit these symptoms; they only  
19 emerged in response to closed questions detailing specific changes in health. Questions using  
20 disease-related labels, e.g. pain or breathlessness, were less likely to elicit symptoms than  
21 questions that used non-disease terminology, such as aches, discomfort or 'getting out of  
22 breath'. Most participants described themselves as feeling well and were reluctant to  
23 associate potentially explained, non-specific or episodic symptoms with LC, even after  
24 diagnosis.  
25  
26  
27  
28

29 **Conclusion:** Patients with early LC are unlikely to present symptoms possibly indicative of  
30 LC that they associate with normal processes, when attending primary care before diagnosis.  
31 Faced with patients at high LC risk, GPs will need to actively elicit potential LC symptoms  
32 not presented by the patient. Closed questions using non-disease terminology might better  
33 elicit normalised symptoms.  
34  
35  
36  
37  
38  
39  
40  
41  
42  
43  
44  
45  
46  
47  
48  
49  
50  
51  
52  
53  
54  
55  
56  
57  
58  
59  
60

## Article Summary

### Article Focus:

- Why symptoms potentially indicative of lung cancer are not presented to GPs
- Exploration of how and why some lung cancer symptoms are normalised by lung cancer patients
- Use of discourse analysis to investigate communication factors involved in the non-presentation and normalisation of symptoms, and how symptoms might be better elicited in primary care.

### Key Messages:

- Non-specific, episodic and non-progressive symptoms were normalised by patients with operable lung cancer who felt well.
- Symptoms normalised by patients with operable lung cancer were not presented to GPs during consultations before diagnosis. GP elicitation of normalised symptoms would lead to better informed referral decisions.
- Closed questions using non-disease terminology were more effective at eliciting symptoms normalised by patients.

### Strengths and limitations of this study:

- This study used interviews to identify interactional factors which influenced symptom presentation within a research study, and it may be that symptom presentation occurs differently within everyday GP consultations; nonetheless our findings indicate that the symptoms normalised by patients within interviews were also the symptoms that consulting patients did not present to GPs. If these normalised symptoms were elicited by GPs, referral decisions would be better informed.
- Most lung cancer patients are diagnosed with inoperable disease and so any sample of patients diagnosed with operable lung cancer is unrepresentative of this patient population. However, research involving operable patients enables the investigation of communication about currently experienced early symptoms, rather than relying on retrospective accounts of early symptoms provided by patients with later stage disease. Furthermore, the reasons these patients gave for non-presentation of symptoms concur with other studies of help-seeking for cancer symptoms, supporting the transferability of our findings.

## Eliciting symptoms interpreted as normal by patients with early stage lung cancer – can we use closed questions to reduce delay in diagnosis?

### INTRODUCTION

Lung cancer is diagnosed too late in the UK and survival rates are lower than in most other Western European countries;[1-4] 86% are diagnosed at a stage when curative treatment is not possible and less than 25% survive one year following diagnosis.[5-6] Lung cancer kills approximately 30,000 people a year in the UK so even modest improvements in the time to diagnosis could dramatically improve health outcomes.[7] Despite successful national cancer screening programmes, most tumours are diagnosed following presentation with symptoms [8] so it is vital to identify patients with significant symptoms early. The UK National Institute of Clinical Excellence (NICE) recommends urgent chest x-ray for patients presenting with any 1 of 10 unexplained or persistent symptoms [9] but General Practitioners (GPs) have to balance risks associated with unnecessary x-ray against possible late diagnosis, and make judgements about the relative validity of alternative explanations for symptoms. This is further complicated by the fact that lung cancer is often preceded by chronic respiratory disease [10] making detection difficult.

Recent evidence [11] indicates that most newly diagnosed lung cancer patients do not recognise all of their cancer symptoms. Isolated single symptoms have low predictive value for lung cancer [12] but patients seldom present multiple symptoms to GPs. [13-14] Interview research has shown that lung cancer patients normalise symptoms and delay seeking help [15-16] and in the general population many symptoms are never presented to GPs [17-18]. However, patients diagnosed with lung cancer have been shown to report symptoms to their GP more frequently than controls 6-24 months before diagnosis [12] but it seems that a combination of cultural and communication processes combine, sometimes fatally, to prevent help-seeking [13,19-20] for the full range of symptoms experienced by patients at increased risk of lung cancer (LC).[11;21]

Previous studies have identified symptom normalisation - the association of symptoms with normal processes - as an important factor in delayed LC diagnosis. However, research has not yet addressed the reasons for normalisation of LC symptoms, or investigated how normalised symptoms that are not presented to health care professionals might be better elicited. Structured interviewing has been used in primary care to improve psychiatric diagnosis but it is not clear if it could help to elicit early lung cancer symptoms. Our study examined how symptoms were normalised by patients and compared structured and unstructured elicitation of symptoms. By using a discourse analytic approach we were able to suggest ways that health care professionals might better elicit normalised symptoms, and investigate why they are not presented to GPs.

### METHODS

#### Design

Previous studies have focused on inoperable lung cancer, but we were interested in how patients communicated early symptoms so we conducted interviews with patients awaiting surgical resection of lung cancer (suspected or histologically confirmed). Previous interview studies with lung cancer patients have relied upon retrospective accounts of early symptoms experienced before diagnosis. In contrast, we were interested in how patients communicate about, and negotiate the relevance of current early symptoms. In retrospective accounts patients might normalise symptoms to justify delays in seeking help so we also investigated the normalisation of symptoms that started following LC investigation. We used unstructured



1  
2  
3 followed by structured interviewing to find out if this could elicit symptoms more effectively  
4 than open questions about changes in health, which have been found not to elicit all lung  
5 cancer symptoms (see Smith et al, 2009).  
6

### 7 8 **Participants**

9 The interview sample for this study was drawn from 28 adult patients with a diagnosis of, or  
10 suspected of having, operable lung cancer (probable: >90% or histologically confirmed)  
11 recruited to a questionnaire development study. Patients were either approached by the  
12 researcher following their first consultation with participating thoracic surgeons at a South  
13 England Trust, or were sent a letter and information sheet by the surgical team. Seventeen  
14 out of twenty consecutive patients within 3 recruitment periods (07/2006-10/2007; 02/2008-  
15 05/2008; 02/2009-05/2009) approached by a researcher agreed to take part. An opportunistic  
16 sample of 11 participants was recruited by letter (within the three recruitment periods).  
17 Twenty eight patients in total were recruited and interviewed about their current and recent  
18 health and help-seeking behaviour.  
19

20  
21 This paper reports the analysis of 20 interviews with patients identified as having operable  
22 lung cancer at the end of the study period (data from seven interviewees who received a non-  
23 malignant diagnosis after the interview were analysed separately and are not reported here.  
24 One patient diagnosed with advanced disease was also excluded). Characteristics of these 20  
25 patients are given in Table 1.  
26

27 [Insert table 1 here]  
28

### 29 30 **Interviews**

31 The unstructured (first) section of the interview used open questions to generate narrative  
32 accounts of participants' experiences and changes in health status (See Appendix 1 for the  
33 interview checklist). Participants were asked to describe anything at all that they had noticed  
34 about their health, even if they thought it not relevant to their investigation for lung cancer.  
35 The second part of the interview was semi-structured and focused on duration and  
36 characteristics of symptoms, and reasons for seeking or not seeking help. The third part of the  
37 interview used closed questions to explore symptoms and help-seeking using a list of  
38 potential lung cancer symptoms compiled from Cancer Research UK [6] information, NICE  
39 [9] guidelines, and a previous interview study with lung cancer patients.[15] Field notes were  
40 recorded after the interview. Interviews lasted between 1-2 hours, took place in the  
41 participants' home (18/20) or a hospital setting (2), some involved the participant's partner  
42 (2) or carer (1), all were audio-recorded, transcribed verbatim, checked for accuracy and  
43 anonymised. An adapted version of Jefferson's transcription conventions [22] were used  
44 (described in Box 1).  
45  
46

47 [Insert Box 1 here]  
48

### 49 50 **Analysis**

51 The first stage of analysis involved an iterative coding process using elements of the constant  
52 comparative method to develop themes (initially identified by LB and checked by a second  
53 researcher, GL, who independently read a sample of transcripts and verified codes and  
54 themes). This iterative process continued until data saturation was achieved. All transcripts  
55 were revisited and deviant cases were sought.[23] Thematic analyses identified symptoms not  
56 presented to GPs, characteristics of symptoms, and reasons given for non-presentation.  
57 Discourse analysis [24-25] which considers language use in context, was used to examine  
58  
59  
60

1  
2  
3 how health changes were presented in patient-interviewer interactions; The discourse analysis  
4 was informed by ethn methodology, an approach which focuses on how social action is  
5 accomplished within accounts. This enabled us to look at the implications of talk's  
6 sequential and micro-organisation for symptom presentation, and showed how normalised  
7 symptoms might be better elicited. We combined the thematic analysis and discourse  
8 analyses to explain normalisation and non-presentation of symptoms. The results section  
9 presents key findings about symptom presentation, including reasons for non-presentation,  
10 and the implications of question type and terminology.  
11  
12

## 16 RESULTS

17 Most participants described themselves as having good health; only four presented accounts  
18 of declining health preceding diagnosis, characterised by multiple symptoms and feeling  
19 unwell (see table 2).  
20

21 [Insert table 2 here]  
22  
23

24 Symptomatic diagnosis occurred for 13 participants and 7 participants claimed not to have  
25 any lung cancer symptoms, describing incidental diagnoses made during the investigation of  
26 unrelated health problems, traumatic injury or screening (Table 3).  
27

28 [Insert link to table 3 here]  
29

30  
31 15 participants described further changes in health possibly indicative of lung cancer  
32 (according to NICE Guidelines/CRUK symptom list) that were not thought a reason for  
33 concern and had not been presented to their GP during LC investigations, despite the  
34 presentation of the trigger symptom or use of primary care services for other reasons. They  
35 did not associate these un-investigated health changes with LC and they were elicited by  
36 closed questions about specific symptoms, but not by open questions about symptoms or  
37 changes in health (Table 3).  
38

39  
40 Two types of symptom accounts were identified: 'symptoms as normal processes' and  
41 'symptoms of disease/concern'. Examples of these accounts and their elicitation are provided  
42 in table 4. Participants reported un-investigated symptoms, and produced normalised  
43 accounts of these, irrespective of patient socio-demographic characteristics, smoking status or  
44 route to diagnosis; there were no discernible differences in relation to table 1 characteristics.  
45 Exceptions appeared to arise only in the case of participants providing narratives of declining  
46 health. The association of symptom normalisation with narratives of good health is  
47 highlighted in table 3; those providing narratives of declining health tended not to normalise  
48 symptoms. Participants with incidental diagnoses also provided normalised accounts of un-  
49 investigated potential LC symptoms, but were less likely to produce symptom of concern  
50 accounts than those with symptomatic diagnoses (see table 3).  
51

52  
53 The first results section – 'Reasons for non-presentation' – describes the main features of  
54 'symptoms as normal processes' accounts (episodic/non-progressive symptoms or ageing and  
55 lifestyle related explanations). 'Symptoms of concern' accounts are described in order to  
56 demonstrate exceptions to the normalisation of symptoms. The second results section  
57  
58  
59  
60

examines the use of closed questions to elicit (normalised) accounts of symptoms not elicited by open questions or presented to GPs, and the implications of symptom terminology.

### Reasons for non-presentation

Normal processes such as lifestyle and ageing were commonly used as explanations for not presenting symptoms to GPs. For example, breathlessness was frequently associated with being unfit, getting older, over-activity or seasonal changes rather than lung cancer:

P18: I just put it down to me being too unfit for that particular run or circuit or down to age...I didn't associate that with anything other than me being old or unfit, one of those.

In these 'symptoms as normal process' accounts patients portrayed symptoms as part of everyday life processes and avoided claiming cancer causation:

LB: ...do you get any discomfort anywhere, do you have any aches or pains?

P11: No (.) only round me neck but that's just recently it's come on. I don't know whether it's to do with this problem I've got ... I think it's a bit of arthritis there. And (.) you know (.) it's old age really I mean, because we do get these things I know, as you get older, (.) but just as I say this last couple of weeks it's got really really bad.

Some of those who described current 'good health' at odds with their diagnosis, also described episodic ill health, or long term symptoms which had led to lifestyle changes and adaptation. Symptoms like breathlessness or cough might be more severe during a chest infection, but were not commented on if they persisted. Here, P25 did not mention breathlessness on climbing the stairs to her GP:

P25: It was getting the pains in my hands and my wrists... It was when it started here [in wrists], it started to hinder me with things...but I wasn't going [to the GP] through breathlessness ...because that had finished when I got better...You know within the week I was back to being able to breathe again. Apart from when I you know whether you get out of breath carrying the Hoover upstairs... [Husband] says "What have you been doing? [ ]?" and I just say "Nothing just those stairs".

The ability to improve did not appear to fit with the expected progressive pattern for a disease such as lung cancer:

P25: [ ]...once I've had my antibiotics or a bit of an inhaler I'm fine again, like I am now... Why don't I feel really, really ill now to understand this? How can you have this and get better and feel better, get ill but then you get better, well how can you do that?

These normalised accounts, by simultaneously presenting alternative non-disease explanations, such as ageing, for health changes, also helped construct the participant as healthy. Exceptions to the use of normalised accounts for un-investigated symptoms were found in four interviews where patients had declining health (consisting of multiple symptoms and feeling unwell); two of these four patients also provided 'quest for diagnosis narratives' in which they had battled, or were still battling, for a diagnosis in the face of clinical ignorance or clinical delay. In the interviews they described most of their health changes in response to open questions (Table 3: Exceptions to the normalisation of symptoms), including symptoms not presented to GPs, and did not normalise these symptoms. Even symptoms presented in response to closed questions were most often not normalised:

LB: So have you noticed any changes in breathing or breathlessness?

- 1  
2  
3 P19: Yes I am definitely more breathless now... I am not normally that breathless!  
4 LB: ...and before that, how would you describe your breathlessness?  
5 P19: Well it's never been really too bad, as long as I've had my inhalers... So it's just recently that I  
6 am beginning to get a bit more breathless and I don't think that's associated with the asthma.  
7

8 Participants who presented themselves as well, normalised non-specific, non-progressive and  
9 episodic symptoms.

10 [Insert table 4 here]  
11

### 12 **Using closed questions to elicit symptoms not elicited by open questions**

13 Symptoms interpreted as normal by participants tended not to be described in response to  
14 open interview questions (Tables 3 & 4) and were not presented to GPs. For example, P22,  
15 who had been investigated by his GP for a bowel disorder in the weeks before diagnosis,  
16 described an absence of symptoms he associated with lung cancer:  
17  
18

- 19 P22: No as I say this was a complete shock to find out that it was on the lung. As I said, we would  
20 never have known anything about it if I hadn't fallen off that thing. I suppose it would eventually with  
21 finding this I suppose I could have lost weight or gone awful thing one to the doctor "well we'll have  
22 to find out what's causing it" but no nothing.  
23

24 However when asked specifically about long-term cough, he revealed he had experienced a  
25 cough for 4-5 months:  
26

- 27 P22: Well I've got a cough now. Every now and again I cough and get a little phlegm up.  
28 LB:... And is it something that you ever went to your doctor about?  
29 P22: No.  
30 LB: No.  
31 P22: No I've never had to do that.  
32

33 Accounts produced in response to closed interview questions about specific symptoms  
34 displayed two common structures for symptom reporting: 'Affirmation/Normalisation' and  
35 'Delayed Affirmation/Normalisation'. The symptom referred to by the interviewer might  
36 either be affirmed but normalised ('Affirmation/Normalisation') or initially denied and then  
37 normalised ('Delayed Affirmation/Normalisation'). When closed questions phrased health  
38 changes in ways which did not necessarily indicate disease, the participant was more likely to  
39 answer affirmatively, or describe a health change, but then suggest the symptom was normal  
40 and not related to lung cancer (Affirmation/Normalisation). In contrast, questions using  
41 disease-related terms - e.g. 'pain' - produced an immediate denial or pause (non-response)  
42 followed by normalisation (Delayed Affirmation/Normalisation):  
43  
44

- 45 LB: ... have you had any chest pain at all that you can describe?  
46 P12: No, not really. I mean as the cough's got shall we say more persistent and sort of shall we say  
47 worse yes (.) I can feel it a bit (.) but I mean I can't feel it now... if you look at the x-rays you  
48 think 'oh blimey!' but you wouldn't know it was there!  
49

50 Reformulation of the question, involving a shift from disease to non-disease terminology,  
51 could elicit normalised accounts of symptoms – as in these examples where a change in  
52 terminology shifting from 'pain' to 'aches' and 'discomfort', and shifting from  
53 'breathlessness' to 'not being able to get your breath' leads to elicitation of the symptoms:  
54

- 55 LR: Have you had any pain anywhere?  
56 P16: None at all. No  
57 LR: ...have you experienced any sort of aches or general sort of discomfort at all? ...  
58  
59  
60

1  
2  
3 P16: No, not serious no. Well ...sometimes I have a  
4 feeling that something's going on, but it's not there all the time, you know  
5

6 LR: And have you experienced breathlessness? ((pause))

7 P18: ((intake of breath))

8 LR: Just feeling like you haven't been able to get your breath quite so easily?

9 P18: I would go up a couple of flights of stairs quite randomly, I would feel out of breath. I would  
10 never never usually be like that, so yes, for a fit guy I would go ooh I'm breathless ...but then  
11 you know I shouldn't have really bothered about it at all. But then again I have put on a slight  
12 bit of weight haven't I?  
13

14 In contrast with disease-related terminology, terminology not strongly associated with disease  
15 such as 'aches' or 'discomfort' rather than 'pain', produced affirmation and then  
16 normalisation (affirmation/normalisation):  
17

18 LB: And have you had any kind of aches or discomforts anywhere?

19 P12: Well I have been complaining about a stiff neck haven't I...and also this shoulder...but I mean  
20 I can play golf, so it's not that bad!  
21

22 Similarly the use of terms that imply 'breathing changes' or 'getting out of breath more  
23 easily', rather than 'breathlessness', produced an affirmation/normalisation response  
24 structure:  
25

26 LB: ...what about breathing changes, or have you ever noticed at all that you can become more  
27 breathless than you would have done say a few years ago when you were doing something?

28 P11: I do now. This past (.) oh couple of months I suppose. I get more breathless if I (.) if I hurry  
29 around too much you know...but normally you know, I don't run around! (LB: no no) If I  
30 remember my age... I don't sort of get out of (.) breathless or anything like that, it's only if I'm  
31 (.) ... overdo things really.  
32

33 Even though closed questions using disease-related terminology might elicit previously  
34 unmentioned health changes, closed questions using non-disease terminology did so more  
35 effectively.  
36

## 37 DISCUSSION

### 38 Eliciting 'hidden' symptoms

39 Most of our sample described themselves as feeling well, despite going on to have a  
40 diagnosis of operable lung cancer. Patients who felt well had experienced a range of health  
41 changes indicative of lung cancer but they did not tell their GPs about many of these, despite  
42 making use of primary care services. Instead they framed these symptoms as normal features  
43 of lifestyle and ageing processes.  
44

45  
46  
47 Delay in lung cancer diagnosis in the UK has been blamed upon patients' failure to recognise  
48 early symptoms.[26] However, our research indicates that normalised symptoms can be  
49 elicited by closed questions. This runs counter to current educational and communication  
50 practice which encourages open and expansive questioning. Whereas open questioning is  
51 necessary to elicit symptoms perceived as abnormal by the patient, normalised symptoms will  
52 remain hidden. Once elicited by closed questions, normalised symptoms are often quickly  
53 obscured within accounts which provide every day explanations for health changes. This  
54 means that interviewers (or health professionals) have to probe normalised accounts to  
55 uncover hidden symptoms.  
56  
57  
58  
59  
60

1  
2  
3 Questions using disease-related symptom terminology, such as ‘chest pain’, or  
4 ‘breathlessness’, appeared to have limited potential to elicit potential lung cancer symptoms  
5 experienced by those with operable lung cancer. Our analysis suggests that to get at these  
6 symptoms we need to ask closed questions without referencing disease-related symptom  
7 labels. Again this runs counter to some guidance such as the NICE referral criteria  
8 terminology which uses disease-related terms. Furthermore, contextual factors and framing of  
9 the patient’s presentation are known to influence GPs’ diagnostic reasoning;[27] patients who  
10 present themselves as well and without declining health might be less likely raise concern and  
11 be referred for investigation of potential cancer symptoms.  
12

13  
14 Recent survey research looking at public awareness of cancer symptoms in the UK,  
15 concluded that levels of knowledge are low for many potential cancer symptoms.[28] These  
16 findings have informed regional NAEDI (National Awareness and Early Diagnosis  
17 Initiatives) [29] materials designed to educate the public about cancer symptoms. It might be  
18 argued that participants in our study simply did not recognise the significance of symptoms  
19 such as breathlessness. However, participants did not report lack of knowledge as the reason  
20 for symptom normalisation and non-presentation. Furthermore, the accounts produced by  
21 participants avoided personal claims of lung cancer aetiology for changes in health, even if  
22 this was raised as a possibility in the interview. Alternative non-lung cancer explanations for  
23 symptoms were provided that had social legitimacy. Our work suggests that lists of  
24 symptoms alone are unlikely to prompt patients to reveal multiple non-specific and  
25 normalised symptoms, especially when they are asked to give unstructured accounts.  
26 Furthermore, our research indicates that lung cancer risk scores provided by symptom based  
27 clinical decision support aids (e.g. RATS[30]), are likely to be influenced by how symptoms  
28 are elicited within the consultation.  
29  
30

31  
32 Patient-centred medicine attempts to honour patients’ experiences and concerns – presented  
33 in their own terms. It has been accompanied by more open consultation styles and a shift  
34 away from interactions directed by the health professional. For patients with potential lung  
35 cancer this may not be the best way to elicit symptoms. Instead routine medical consultations  
36 involving those at increased cancer risk [31] might better be restructured to enable the  
37 presentation of health changes which appear normal or unproblematic to the patient. This  
38 would require the clinician to be aware of the risk of lung cancer in all patients presenting to  
39 their service with symptoms seemingly unrelated to lung cancer. The elicitation of  
40 normalised symptoms in patients at increased lung cancer risk might then facilitate GPs’  
41 chest x-ray referral decisions.  
42  
43

#### 44 **Strengths and Limitations**

45 This study used interviews to identify interactional factors which influenced symptom  
46 presentation within a research study. The systematic and in-depth study of language of the  
47 type reported in this article can lead to critical insights about conventions used in  
48 conversation that are transferable between settings.[32] However, it may be that symptom  
49 presentation occurs differently within everyday GP consultations; closed questions involving  
50 non-disease terminology might not be as effective at eliciting normalised symptoms within  
51 primary care practice. Further research involving GP consultations will be required to  
52 establish how effective these methods of symptom elicitation are within primary care.  
53 Nonetheless our findings indicate that the symptoms normalised by patients within interviews  
54 were also the symptoms that consulting patients did not present to GPs. If these normalised  
55 symptoms that are potentially indicative of LC were elicited by GPs, referral decisions would  
56 be better informed.  
57  
58  
59  
60

1  
2  
3  
4 The participant group were patients with an established or probable lung cancer diagnosis.  
5 This may influence symptom presentation in the interview as a LC diagnosis is already  
6 suspected. However, the normalisation of symptoms that started after diagnosis within this  
7 study suggests that normalisation is not justifying delays in diagnosis; the association of  
8 episodic, non-specific symptoms with normal processes appears commonplace for those  
9 feeling well, even when lung cancer provides a potential explanation for symptoms.  
10

11  
12 NICE referrals guidelines for suspected lung cancer are based upon a weak evidence base;  
13 therefore, we do not know the likelihood that the symptoms not presented to GPs were caused  
14 by LC. However, these guidelines represent the best evidence currently available to inform  
15 referral for lung cancer investigation. If these non-specific symptoms experienced by  
16 patients at increased lung cancer risk were elicited in primary care, GPs would be better able  
17 to operationalize NICE guidelines. A prospective study may eventually determine the utility  
18 of these symptoms in the early diagnosis of lung cancer and the efficacy of treatment  
19 (including surgery).  
20

21  
22 The majority of lung cancer patients are diagnosed with inoperable disease and so any sample  
23 of patients diagnosed with operable lung cancer is necessarily unrepresentative of the whole  
24 population of lung cancer patients. It may be that our participants were more symptomatic in  
25 the early stages, or more likely to seek medical help, than those diagnosed with inoperable  
26 disease. However, this makes it all the more compelling that these participants still  
27 experienced a number of symptoms that they did not report. The reasons these patients with  
28 lung cancer give for non-presentation of symptoms concur with other studies of help-seeking  
29 for cancer symptoms,[19] supporting the transferability of our findings. Furthermore, our  
30 finding that those who reported good health tended to normalise nonspecific, episodic and  
31 non-progressive symptoms might have implications for improving earlier detection of other  
32 cancers where patients describe good health in the early stages, and for patient-clinician  
33 communication more generally.  
34

### 35 36 **Conclusions**

37 Even though lung cancer patients are more likely to attend their GP with potential symptoms  
38 in the year before diagnosis than healthy controls, our findings indicate that many non-  
39 specific symptoms are not presented within these consultations. The use of non-disease  
40 related symptom labels in combination with some closed questioning appears to improve  
41 symptom elicitation.  
42

43  
44 Eliciting and investigating normalised symptoms – to uncover the invisible part of the illness  
45 iceberg,[16-17] whilst not feasible for all patients attending primary care, would be possible  
46 for those identified as at increased lung cancer risk.[31]  
47

48  
49 **Ethical approval:** NHS ethical approval was gained from Southampton South Central  
50 Research Ethics Committee (05/Q1702/46).  
51

52  
53 **Authorship:** All authors have commented on the first and final draft of the paper, and  
54 contributed to interpretation of the data. LB was the chief investigator; she had the original  
55 idea, designed the study, conducted interviews, analysed the data, and produced all drafts.  
56 CP also commented on the penultimate draft of the paper and edited the final draft. GL  
57  
58  
59  
60

1  
2  
3 contributed to coding of the interview transcripts. AB also contributed to data collection. LB  
4 is the guarantor for the study.  
5

6 **Licence:** The Corresponding Author has the right to grant on behalf of all authors and does  
7 grant on behalf of all authors, a worldwide licence to the Publishers and its licensees in  
8 perpetuity, in all forms, formats and media (whether known now or created in the future), to  
9 i) publish, reproduce, distribute, display and store the Contribution, ii) translate the  
10 Contribution into other languages, create adaptations, reprints, include within collections and  
11 create summaries, extracts and/or, abstracts of the Contribution, iii) create any other  
12 derivative work(s) based on the Contribution, iv) to exploit all subsidiary rights in the  
13 Contribution, v) the inclusion of electronic links from the Contribution to third party material  
14 where-ever it may be located; and, vi) licence any third party to do any or all of the above.  
15  
16  
17

18 **Access to data:** All authors had access to the data and can take responsibility for the integrity  
19 of the data and the accuracy of the data analysis.  
20  
21

22 **Competing interest declaration:** "All authors have completed the Unified Competing  
23 Interest form at [www.icmje.org/coi\\_disclosure.pdf](http://www.icmje.org/coi_disclosure.pdf) (available on request from the  
24 corresponding author) and declare: LB had support from Research Councils UK for the  
25 submitted work; no financial relationships with any organisations that might have an interest  
26 in the submitted work in the previous 3 years; no other relationships or activities that could  
27 appear to have influenced the submitted work."  
28  
29

30 **Contributions:** Liz Roffe conducted some interviews. The structured section of the  
31 interview was based upon an interview schedule developed by Corner, Hopkinson,  
32 Fitzsimmons et al. (2005).  
33  
34

35 **Data Sharing:** Research participants have not given informed consent for data sharing; a  
36 complete qualitative data set cannot be anonymised adequately.  
37  
38

39 **Funding:** This research was funded by an RCUK (Research Councils UK) Post-Doctoral  
40 Fellowship awarded to Lucy Brindle to develop research to improve earlier lung cancer  
41 diagnosis (sponsor: Faculty of Health Sciences, University of Southampton - Jessica Corner).  
42

43 **Independence:** The funders (RCUK) had no influence on the design, conduct or reporting of  
44 this research.  
45  
46  
47

## 48 REFERENCES

49  
50 1 Laroche, C, Wells F, Coulden R, Stewart S, Goddard M, Lowry E, Price A, Gilligan D.  
51 Improving surgical resection rate in lung cancer. *Thorax* 1998;**53**:445-449.  
52  
53  
54  
55  
56  
57  
58  
59  
60



1  
2  
3 2 Coleman MP, Gatta G, Verdecchia A, Estève J, Sant M, Storm H, Allemani C, Ciccolallo  
4  
5 L, Santaquilani M, Berrino F. EUROCARE-3 summary: cancer survival in Europe at the end  
6  
7 of the 20th century. *Annals of Oncology* 2003; **14**(S5): v128-149.  
8  
9

10  
11 3 Richards M. EUROCARE-4 studies bring new data on cancer survival. *Lancet Oncol*  
12  
13 2007;**8**:752-753.  
14

15  
16 4 Imperatori A, Harrison RN, Leitch DN, Rovera F, Lepore G, Dionigi G, Sutton P,  
17  
18 Dominioni L. Lung cancer in Teesside (UK) and Varese (Italy): a comparison of management  
19  
20 and survival. *Thorax* 2006;**61**:232-239.  
21  
22

23  
24 5 ONS. Bulletin: Cancer Survival in England, 2005-2009 and followed up to 2010. 26<sup>th</sup> April  
25  
26 2012. [http://www.ons.gov.uk/ons/rel/cancer-unit/cancer-survival-rates/2005-2009-followed-](http://www.ons.gov.uk/ons/rel/cancer-unit/cancer-survival-rates/2005-2009-followed-up-to-2010/)  
27  
28 [up-to-2010/](http://www.ons.gov.uk/ons/rel/cancer-unit/cancer-survival-rates/2005-2009-followed-up-to-2010/) (accessed Aug 2012).  
29  
30

31  
32 6 Cancer Research UK. Cancer Help UK. Information service about cancer and cancer care.  
33  
34 [www.cancerhelp.org.uk/help/default.asp?page=2964](http://www.cancerhelp.org.uk/help/default.asp?page=2964) (accessed Aug 2012).  
35  
36

37  
38 7 Richards MA. The size of the prize for earlier diagnosis of cancer in England. *Br J Cancer*  
39  
40 2009;**101** (Suppl 2):S125-9.  
41  
42

43  
44 8 Hamilton W, Peters TJ. *Cancer Diagnosis in Primary Care*. Oxford: Churchill Livingstone,  
45  
46 2007: 1-200.  
47

48  
49 9 National Institute for Health and Clinical Excellence. The diagnosis and treatment of lung  
50  
51 cancer (update). (Clinical Guideline 121) 2011. <http://guidance.nice.org.uk/CG121>.  
52  
53  
54  
55  
56  
57  
58  
59  
60

1  
2  
3 10 Young RP, Hopkins RJ, Christma T, Black PN, Metcalf P, Gamble GD. COPD prevalence  
4 is increased in lung cancer independent of age, gender and smoking history. *Eur Respir J*.  
5  
6 2009;**34**:380-386.  
7  
8

9  
10  
11 11 Smith SM, Campbell NC, MacLeod U, Lee AJ, Raja A, Wyke S, Ziebland SB, Duff EM,  
12 Ritchie LD, Nicolson MC. Factors contributing to the time taken to consult with symptoms of  
13 lung cancer: a cross-sectional study *Thorax* 2009;**64**: 523-531.  
14  
15

16  
17  
18 12 Hamilton W, Peters TJ, Round A, Sharp D. What are the clinical features of lung cancer  
19 before the diagnosis is made? A population based case-control study. *Thorax* 2005;**60**:1059-  
20  
21 1065.  
22  
23

24  
25  
26 13 Heritage J, Robinson JD, Elliott MN, Beckett M, Wilkes M. Reducing Patients' Unmet  
27 Concerns: The difference one word can make. *J Gen Intern Med*. 2007;**22**:1429-33.  
28  
29

30  
31  
32 14 Barry CA, Bradley, CP, Britten, N, Stevenson, FA, Barber, N. Patients' unvoiced agendas  
33 in general practice consultation: Qualitative study. *BMJ* 2000; **320**: 1246-1250.  
34  
35

36  
37  
38 15 Corner J, Hopkinson J, Fitzsimmons D, Barclay S, Muers, M. Is late diagnosis of lung  
39 cancer inevitable? Interview study of patients' recollections of symptoms before diagnosis.  
40  
41 *Thorax* 2005; **60**:314-319.  
42  
43

44  
45 16 Tod AM. Allmark P. Craven J. Diagnostic delay in lung cancer: a qualitative study. *J Adv*  
46  
47 *Nurs* 2007;**61**: 336-343.  
48  
49

50  
51 17 Wadsworth M, Butterfield W, Blaney R. Health and sickness: the choice of treatment.  
52  
53 London: Tavistock, 1971:1-114.  
54  
55

1  
2  
3 18 Scambler A, Scambler G, Craig D. Kinship and friendship networks and women's demand  
4  
5 for primary care. *Br J Gen Pract* 1981;**26**:746–750.  
6

7  
8  
9 19 Smith LK, Pope, C, Botha JL. Patients' help-seeking experiences and delay in cancer  
10  
11 presentation: a qualitative synthesis. *Lancet* 2005;**366**:825-831.  
12

13  
14 20 Andersen RS, Paarup B, Vedsted P, Bro F, Soendergaard J. 'Containment' as an analytical  
15  
16 framework for understanding patient delay: A qualitative study of cancer patients' symptom  
17  
18 interpretation processes. *Soc Sci Med* 2010;**71**:378-385.  
19

20  
21 21 Macleod U, Mitchell ED, Burgess C, Macdonald S, Ramirez AJ. Risk factors for delayed  
22  
23 presentation and referral of symptomatic cancer: evidence for common cancers. *Brit J*  
24  
25 *Cancer* 2009;**101** (suppl 2): S92-101.  
26  
27

28  
29 22 Jefferson G. Glossary of transcript symbols with an introduction. In: Lerner GH ed.  
30  
31 *Conversation Analysis: Studies From the First Generation*. Philadelphia: John Benjamins  
32  
33 Publishing Company, 2004: 13-23.  
34  
35

36  
37 23 Silverman D. Interpreting Qualitative Data, Methods for Analysing Text Talk and  
38  
39 Interaction. London: Sage Publications, 2001:1-323.  
40  
41

42  
43 24 Roberts C, Sarangi S. Theme oriented discourse analysis of medical encounters. *Med*  
44  
45 *Educ.* 2005;**39**:632–640.  
46  
47

48  
49 25 Roberts, C. What counts as discourse analysis and what use is it? *BMJ* 2008;**337**:a879.  
50  
51

52  
53 26 Corner, J, Brindle L. The influence of social processes on the timing of cancer diagnosis: a  
54  
55 research agenda. *J Epidemiol Community Health.* 2011;**65**:477-82.  
56  
57  
58  
59  
60

1  
2  
3 27 Stolper E, Van de Wiell M, Van Royen P, Van Bokhoven M, Van der Weijden T, Dinant  
4  
5 GJ. Gut feelings as a third track in general practitioners' diagnostic reasoning. *J Gen Intern*  
6  
7 *Med* 2011;**26**: 197-203.

8  
9  
10 28 Robb, K, Stubbings S, Ramirez A, Macleod U, Austoker J, Waller J, et al. Public  
11  
12 awareness of cancer in Britain: a population-based survey of adults. *Brit J Cancer* 2009;**101**  
13  
14 (suppl2):S18-23.

15  
16  
17 29 National Awareness and Early Diagnosis Initiative (NAEDI).  
18  
19 <http://info.cancerresearchuk.org/spotcancerearly/naedi/AboutNAEDI/> (accessed Aug 2012)  
20  
21

22  
23 30 Hamilton W. The CAPER studies: five case-control studies aimed at identifying and  
24  
25 quantifying the risk of cancer in symptomatic primary care patients. *Brit J Cancer* 2009;**101**  
26  
27 (suppl 2):S80-6.

28  
29 31 Cassidy A, Myles JP, Van TM Page RD, Liloglou T, Duffy SW, Field JK. The LLP risk  
30  
31 model: an individual risk prediction model for lung cancer. *Br J Cancer* 2008; **98**:270-276.  
32  
33

34  
35 32 Heritage J. The interaction order and clinical practice: Some observations on dysfunctions  
36  
37 and action steps. *Patient Educ Couns* 2011;**84**:338-43.  
38  
39  
40  
41  
42  
43  
44  
45  
46  
47  
48  
49  
50  
51  
52  
53  
54  
55  
56  
57  
58  
59  
60

**Box 1****Transcription Notation** (Simplified and adapted version of Jeffersonian transcribing conventions)

- The speaker is identified by a participant identifier (P1-P28) followed by a colon. The participant's partner is indicated by a P following the participant identifier e.g.:

P24P: No I don't agree

- Round brackets indicate that the material in the brackets is either inaudible, e.g.:

M: I ( ) that

Or there is doubt about its accuracy, e.g.:

M: I (couldn't tell you) that

- A micropause (a noticeable pause of less than 0.2 seconds) is indicated by a dot enclosed in brackets:

(.)

- Non-verbal activities and noticeable pauses of 0.2 seconds or more are indicated within double brackets:

M: Yes ((laughter)) but ((pause)) I don't know

- Square brackets indicate that material has been removed, usually to protect the participant's identity, e.g.:

[ ] or [town]

- Three consecutive dots indicates that a section of transcript has been removed:

M: He ran up the hill...to the house at the top

- Square brackets between adjacent lines of speech mark the start and end of overlapping talk

[ ]

| <b>Table 1</b>                                                                                                                                        |             |
|-------------------------------------------------------------------------------------------------------------------------------------------------------|-------------|
| <b>Patient characteristics (n=20)</b>                                                                                                                 |             |
| <b>Sex</b> (male/female)                                                                                                                              | 13/7        |
| <b>Age – years</b> (median; range)                                                                                                                    | 71.5; 41-86 |
| 40-49                                                                                                                                                 | 1           |
| 50-59                                                                                                                                                 | 1           |
| 60-69                                                                                                                                                 | 6           |
| 70-79                                                                                                                                                 | 10          |
| >=80                                                                                                                                                  | 2           |
| <b>Diagnosis</b>                                                                                                                                      |             |
| Incidental                                                                                                                                            | 8           |
| Symptomatic                                                                                                                                           | 12          |
| <b>Smoking status</b>                                                                                                                                 |             |
| Current smoker                                                                                                                                        | 4           |
| Ceased in the last 3 months                                                                                                                           | 4           |
| Former smoker (ceased >3 months ago)                                                                                                                  | 11          |
| Never smoker                                                                                                                                          | 1           |
| <b>Comorbidities:</b>                                                                                                                                 |             |
| Symptomatic COPD (spirometry +ve or clinical diagnosis)                                                                                               | 8           |
| Primary/Secondary Care COPD diagnosis (primary care diagnosis preceding 2ndry care LC investigation/diagnosis during secondary care LC investigation) | 3/5         |
| Asthma                                                                                                                                                | 5           |
| Ischaemic Heart Disease                                                                                                                               | 1           |
| Congestive cardiac failure                                                                                                                            | 1           |
| Other cardiac Problems                                                                                                                                | 2           |
| <b>Socioeconomic status</b> (Index of Multiple Deprivation):                                                                                          |             |
| Most deprived 50%                                                                                                                                     | 8           |
| Least deprived 50%                                                                                                                                    | 12          |

**Table 2: Accounts of general health**

|                 | <b>Feeling well despite symptoms</b>                                                                                                                                                                                                                                                                                                                                                                                                                                                                                                                                                                                                                                                                                                                                                                                      |
|-----------------|---------------------------------------------------------------------------------------------------------------------------------------------------------------------------------------------------------------------------------------------------------------------------------------------------------------------------------------------------------------------------------------------------------------------------------------------------------------------------------------------------------------------------------------------------------------------------------------------------------------------------------------------------------------------------------------------------------------------------------------------------------------------------------------------------------------------------|
| <b>P7</b>       | <p>LR: But you have had these headaches. Um. Would you say you've been feeling generally unwell?</p> <p>P7: Not really</p> <p>P7P: I don't know if you're feeling unwell</p> <p>P7: No. Just odd now and again.</p>                                                                                                                                                                                                                                                                                                                                                                                                                                                                                                                                                                                                       |
| <b>P10</b>      | <p>P10: I mean I've been quite healthy (.) I've got high blood pressure I mean I've had that ooh [&gt;20 years]... so that's all fairly long going you know but I haven't had any actual illnesses or anything</p>                                                                                                                                                                                                                                                                                                                                                                                                                                                                                                                                                                                                        |
| <b>P11</b>      | <p>P11: I didn't feel anything was wrong inside. I mean I had no inkling at all. Um. If I had had that x-ray, but I wouldn't have known because I (.) there was (.) I felt quite well really, it was only just you know this operation on my neck</p>                                                                                                                                                                                                                                                                                                                                                                                                                                                                                                                                                                     |
| <b>P16</b>      | <p>P16: When I had the cough you know she said they'd picked up the shadow...I probably sat there for a few seconds you know trying to take it in but that wasn't, when she said that I didn't get the feeling then that there was something wrong (LR: No) because as far as I knew I hadn't got anything wrong with me, but it's so there you are.</p>                                                                                                                                                                                                                                                                                                                                                                                                                                                                  |
| <b>P25</b>      | <p>P25: I was ill a lot last year but when I was taken into hospital and the antibiotics and the treatment I had and the months rest I had when I came home where I wasn't going to work (since then I've cut my hours down) I feel so well. But I honestly was not expecting anything like that to be said to me, because I feel so much better than I did last year... In fact I feel better now at the moment than I have done for a long time...you see once I've had my antibiotics or a bit of an inhaler I'm fine again, like I am now. So at the moment, I feel so much better that I think it's not making any sense to me.</p>                                                                                                                                                                                  |
|                 | <b>Exceptions to feeling well despite symptoms – declining health</b>                                                                                                                                                                                                                                                                                                                                                                                                                                                                                                                                                                                                                                                                                                                                                     |
| <b>P17</b>      | <p>P17: About a year ago. "What's that? What's going wrong with me" you know and I was going like that. Everything goes tonta... feels as though I can't breathe you know and then I'd just (indicates short breaths) only for a second, and then it's gone and then I'd go back to breathing and everything like that, ... And that was about a year ago, that's when I noticed "[ ], there's something wrong with you".</p>                                                                                                                                                                                                                                                                                                                                                                                             |
| <b>P19</b><br>: | <p>LB: How would you describe how you feel now?</p> <p>P19: Not perfect. No. I mean I'm tired now. This made me tired! That's shows you how and it wouldn't normally do that!</p>                                                                                                                                                                                                                                                                                                                                                                                                                                                                                                                                                                                                                                         |
| <b>P20</b><br>: | <p>P20: And it was afterwards I was thinking I shall be able to get back on me feet now but instead I seem to be going on a slow decline. And I started to lose weight and like I said, things started tasting funny and all this, and I'm saying "Ok". And then I'd have a cold and this cough that wouldn't go away and to be honest I used to be coughing nearly all the time and it was like having a cold 24 hours a day, seven days a week. I'd start to get really tired and as I say, I was quite busy on Tuesday and I was throwing out rubbish... and then I cleaned all me windows. And yesterday, I felt like I'd been run over by a ten ton truck! And I thought 'well this is not me' It's just not me...maybe it's mental, you know, your own brain saying 'your body's not very well, just slow down'</p> |
| <b>P26</b>      | <p>P26P: This last year she's deteriorated in many things.</p> <p>P26: Well I think you can understand it though.</p> <p>P26P: That's geriatrics for you isn't it?</p> <p>P26: No it isn't you can understand it, when you've had a cough for this long. I mean it really takes it out of you, it really does. You try explaining that to the doctor!</p>                                                                                                                                                                                                                                                                                                                                                                                                                                                                 |

**Table 3: Patient reported symptoms and triggers to diagnosis**

| Participant                  | Triggers to diagnosis                                       | Symptoms of concern/disease (Elicited by open questions except where indicated)                                                                           | Symptoms as normal processes (Elicited by closed questions except where indicated)                              |
|------------------------------|-------------------------------------------------------------|-----------------------------------------------------------------------------------------------------------------------------------------------------------|-----------------------------------------------------------------------------------------------------------------|
| <b>Symptomatic Diagnoses</b> |                                                             |                                                                                                                                                           |                                                                                                                 |
| 06                           | Severe cough > 3 weeks                                      | Severe productive cough (3-4 times a year of 2 days duration, for 5 years.)                                                                               | Increase in breathlessness, Fatigue                                                                             |
| 08                           | Weight loss                                                 | weight loss                                                                                                                                               | <sup>1</sup> Weight loss – some weight now regained ( <b>open question</b> )                                    |
| 12                           | Persistent cough; haemoptysis                               | Persistent, tickly, non-productive, mild cough; haemoptysis                                                                                               | Aches and discomfort: Stiff neck and left shoulders; weight loss; some discomfort with coughing as time went on |
| 016                          | Cough; fatigue; feeling unwell; appetite loss; weight loss. | Appetite loss; weight loss - returned to normal; dry cough; feeling unwell                                                                                | Increase in breathlessness; a feeling (not pain) “that something is going on’ in the chest”; fingers go numb.   |
| 018                          | Chest infection; haemoptysis                                | Repeated cough; chest infections; regular sneezing and flu like symptoms; sore throat; fatigue; Sore testicles; flushing across stomach; ache across back | Increase in breathlessness; pain in centre of chest; occasional coughing with chest infection                   |
| 023                          | Weight loss; anaemia                                        | Flu and a scratchy dry cough; night sweats; weight loss; anaemia; tiredness; sensitive gums; soft hair; taste change ( <b>closed question</b> )           | Twinges in fingers and hands                                                                                    |
| 024                          | Haemoptysis; Dyspnea                                        | Haemoptysis; night sweats                                                                                                                                 | Cough; breathlessness and wheezing.                                                                             |
| 025                          | Dyspnea                                                     | Pains in legs and joints; fatigue, breathlessness                                                                                                         | Chest pain recently when lying down.                                                                            |
| 027                          | Dyspnea                                                     | Breathlessness on exertion                                                                                                                                | Occasional hot shooting pain in chest                                                                           |



| <b>Exceptions to the normalisation of symptoms not presented to GPs/elicited by closed questions: Decline narratives (D) and Quest for Diagnosis narratives (Q)</b> |                                                                     |                                                                                                                                                                                                                                                                                                |                                                                                                      |
|---------------------------------------------------------------------------------------------------------------------------------------------------------------------|---------------------------------------------------------------------|------------------------------------------------------------------------------------------------------------------------------------------------------------------------------------------------------------------------------------------------------------------------------------------------|------------------------------------------------------------------------------------------------------|
| 017<br>(D)                                                                                                                                                          | Chest/abdominal pain                                                | Aching pain from indigestion; cough; pain across shoulders; aches; having less energy; breathlessness on resting/panic attacks<br><b>Elicited by closed questions:</b> breathlessness on walking and when lying down                                                                           |                                                                                                      |
| 019<br>(D)                                                                                                                                                          | Anaemia                                                             | Sickness if over eat; bleeding in throat and vomiting large amounts of blood (now stopped).<br><b>Elicited by closed questions:</b> Pain in stomach; loss of appetite; tiredness; increase in breathlessness; pain in chest when breathing in.                                                 |                                                                                                      |
| 020<br>(D and Q)                                                                                                                                                    | Persistent cough                                                    | Weight loss; fatigue; taste change; hot and cold sweats; reduction in appetite ( <b>closed question</b> )                                                                                                                                                                                      | breathlessness on physical activity; weight loss - some weight now regained ( <b>open question</b> ) |
| 026<br>(D and Q)                                                                                                                                                    | Persistent cough; recurrent chest infections for the last 10 years. | Regular chest infections and productive coughs; recent weight loss; cough triggered by eating, talking and cold air; dullish ache in back; coughing up occasional flecks of blood; fatigue and energy loss; night sweats – started at menopause but now every night ( <b>closed question</b> ) |                                                                                                      |
| <b>Incidental Diagnoses</b>                                                                                                                                         |                                                                     |                                                                                                                                                                                                                                                                                                |                                                                                                      |
|                                                                                                                                                                     | <b>Triggers to diagnosis</b>                                        | <b>Symptoms of concern/disease</b><br>(Elicited by open questions)                                                                                                                                                                                                                             | <b>Symptoms as normal processes</b> (Elicited by closed questions)                                   |
| 03                                                                                                                                                                  | CXR following traumatic injury                                      | Gradually increasing breathlessness not noticed until diagnosis.                                                                                                                                                                                                                               | Weight loss                                                                                          |
| 07                                                                                                                                                                  | Routine CXR on hospital admission                                   |                                                                                                                                                                                                                                                                                                | Fatigue                                                                                              |
| 010                                                                                                                                                                 | Routine CXR on hospital admission                                   |                                                                                                                                                                                                                                                                                                | Change in bowel movements, fatigue                                                                   |
| 011                                                                                                                                                                 | CXR Investigation of increased                                      |                                                                                                                                                                                                                                                                                                | Breathlessness; aches and pain back of left shoulder                                                 |

|     |                                                                        |                                                |                                      |
|-----|------------------------------------------------------------------------|------------------------------------------------|--------------------------------------|
|     | heart rate following surgery                                           |                                                | under arm and side of chest; fatigue |
| 021 | CXR investigation of weight loss and anaemia detected by health screen | Anaemia                                        | Weight loss                          |
| 022 | CXR following traumatic injury                                         |                                                | Cough; taste change; bowel changes   |
| 028 | Imaging of kidney to investigate haematuria                            | Chest infection following investigation for LC | Breathlessness                       |

<sup>1</sup>Occasionally participants would provide a symptom of concern/disease account when describing previous help-seeking, but would then reinterpret and normalise the symptom if it had improved since seeking help.

**Table 4: Comparison of ‘Symptoms of Concern’ and ‘Symptoms as Normal Processes’ accounts**

|            | Symptoms of Concern/Disease accounts                                                                                                                                                                                                                                                                                                                                                                                                                                                                                                                                                                                                        | Symptoms as Normal Processes accounts                                                                                                                                                                                                                                                                                                                                                                                                                                                                                                                                                                                                                                                                                                                           |
|------------|---------------------------------------------------------------------------------------------------------------------------------------------------------------------------------------------------------------------------------------------------------------------------------------------------------------------------------------------------------------------------------------------------------------------------------------------------------------------------------------------------------------------------------------------------------------------------------------------------------------------------------------------|-----------------------------------------------------------------------------------------------------------------------------------------------------------------------------------------------------------------------------------------------------------------------------------------------------------------------------------------------------------------------------------------------------------------------------------------------------------------------------------------------------------------------------------------------------------------------------------------------------------------------------------------------------------------------------------------------------------------------------------------------------------------|
| <b>P6</b>  | <p>LR: ...how [do] you think it all sort of started?</p> <p>P6: ... we went merrily on our holiday, and the cough just got worse and worse and worse. Coughing 24 hours a day the whole of the five days we were away...I went to see a doctor [who prescribed antibiotics] ...the antibiotics didn't touch it at all, so when we came back, I went to see one of my own doctors and he said 'you've probably got a chest infection. I'll give you some more antibiotics' ... 'if at the end of seven days it hasn't gone, then I think you'd better go and get an x-ray'.</p>                                                              | <p>LR: OK. So cough, we've done. Breathlessness?</p> <p>P6: ... That [the pacemaker] cured it...so at the moment I'm just left with the cough or whatever...</p> <p>LR: So the only times you get breathless really are then when you're coughing?</p> <p>P6: Yeah.</p> <p>LR: Do you notice (.) is there any other time now</p> <p>P6: Occasionally I get breathless walking up hill, but that's to be expected.</p> <p>P6P: And you did a bit Friday which was stress I think.</p> <p>P6: Yeah, Friday...It does occasionally happen when I'm sitting down ... Up to recently I've been playing golf twice a week, so there can't be an awful lot wrong with me, but I do get occasionally short of breath...Just suddenly start breathing rather rapidly</p> |
| <b>P12</b> | <p>LB: Do you want to just tell me how you came to be in Mr [ ] clinic and what were the events that</p> <p>[ ]</p> <p>P12: yes. I had a particularly persistent cough that wouldn't go away...although it was literally just a sort of a clearing the throat, that sort of thing... [then] I woke in the middle of the night with a cough, my mouth filled with what I thought was catarrh, went to the basin, spat it out (.) blood bright red and dark red. And it bled for about 10 or 15 minutes...and it hasn't bled since... Anyway, Monday ... went to see GP... immediately gave me the ticket to go to the walk in x-ray [ ].</p> | <p>LB: Have you lost any weight at all?</p> <p>P12: A bit, mm. I would say less than half a stone</p> <p>P12P: We have a very active cruise, we do a lot of walking and sightseeing...</p> <p>P12: And then you know, we go to [UK holiday destination] most years. And we walk a tremendous amount. And I swim a lot there, don't I? So that's a very active holiday.</p>                                                                                                                                                                                                                                                                                                                                                                                      |

|                   |                                                                                                                                                                                                                                                                                                                                                                                                                   |                                                                                                                                                                                                                                                                                                                                                                                                                                                                                                                                                                                                                                                                                                                                                                                                                                                                          |
|-------------------|-------------------------------------------------------------------------------------------------------------------------------------------------------------------------------------------------------------------------------------------------------------------------------------------------------------------------------------------------------------------------------------------------------------------|--------------------------------------------------------------------------------------------------------------------------------------------------------------------------------------------------------------------------------------------------------------------------------------------------------------------------------------------------------------------------------------------------------------------------------------------------------------------------------------------------------------------------------------------------------------------------------------------------------------------------------------------------------------------------------------------------------------------------------------------------------------------------------------------------------------------------------------------------------------------------|
| <p><b>P16</b></p> | <p>P16: I developed a cough and also that I didn't feel very well and I'd also lost some weight. I went to the doctors ... [s/he] sent me for a blood test and an x-ray. And several days later [s/he] rang and said I want to see you and by this time I'd got my appetite back and my weight had come back up again...</p>                                                                                      | <p>P16 : I think perhaps if it had just been a cough, perhaps I wouldn't have bothered ...<br/> P16P: ... after you were feeling better, you'd put weight back on and you'd still got this funny cough, I think you could have gone on for months with that funny cough<br/> [ ]...<br/> P16: LR: have you experienced any breathlessness at all? ((pause)) Or sort of thing like you<br/> [ ]<br/> P16: I play golf and parts of the course are a bit steep and I must admit I get a bit puffed going up there but yeah it's not serious I just got to take it easy... as you get older so you can't do the things you did when you were a bit younger so ...quite often you put things down to change of your age and lifestyle and it wasn't that significant...I really wouldn't say I get breathless, I mean you [participant's wife] couldn't keep up with me.</p> |
| <p><b>P23</b></p> | <p>P23: and then we got to Christmas, and we were partying etc and to be quite honest, I should have put on more weight than I did. So I started to think 'well what's going on?' About [ ] months ago I had a colonoscopy and had a few polyps removed etc...I started to get night sweats, totally different from hot flushes...so I thought 'ooh this is a bit odd'.</p>                                       | <p>LB: Have you suffered from any backache or shoulder ache?<br/> P23: No.<br/> LB: Anything that you thought might be something else wrong?<br/> P23: I've had perhaps the odd twinge [in fingers] that I would put down to arthritis while doing the garden or something but – this is the annoying fact, I am quite healthy; well I think I'm quite healthy, and so no I wouldn't say I've had aches and pains.</p>                                                                                                                                                                                                                                                                                                                                                                                                                                                   |
| <p><b>P24</b></p> | <p>P24: I started coughing up blood and I was already at Dr [ ]s clinic and when I told [ her ] I was coughing up blood, s/he referred me to the chest clinic which is next to Oncology, so that made me feel a bit suspicious... By that time I was admitted to hospital because I was coughing up what I thought was a lot of blood, and I had a lot of problem breathing... Dr [ ] came over to see ...and</p> | <p>LB:...when you were having breathing problems, did you ever have any wheezing with it?<br/> P24: Oh I do wheeze a bit in bed now. It's just you get used to the noises that your chest makes don't you really? I just think 'oh shut up'. I mean I do sleep very, very well unless I'm depressed...Sometimes just when I lie down I'll wheeze a bit and that's</p>                                                                                                                                                                                                                                                                                                                                                                                                                                                                                                    |

|            |                                                                               |                                                                                                                                                                                                                                                                                                                                                                                                                                                                                                                                                                                                                                                                                                                                                                                                                                              |
|------------|-------------------------------------------------------------------------------|----------------------------------------------------------------------------------------------------------------------------------------------------------------------------------------------------------------------------------------------------------------------------------------------------------------------------------------------------------------------------------------------------------------------------------------------------------------------------------------------------------------------------------------------------------------------------------------------------------------------------------------------------------------------------------------------------------------------------------------------------------------------------------------------------------------------------------------------|
|            | he changed my inhalers and took me off beta blockers and transformed my life! | obviously changing from upright position to lying down but and not to any extent.                                                                                                                                                                                                                                                                                                                                                                                                                                                                                                                                                                                                                                                                                                                                                            |
|            | <b>Incidental Diagnosis</b>                                                   |                                                                                                                                                                                                                                                                                                                                                                                                                                                                                                                                                                                                                                                                                                                                                                                                                                              |
| <b>P3</b>  |                                                                               | <p>LR: Er, so have you had any weight loss at all?</p> <p>P3: Yes. The lady [ ] that dances with me, she's been making off for months now that I'm losing weight.</p> <p>LR: Yeah?</p> <p>P3: Yeah. So I expect to lose weight in the summer months because you're more active over the allotments. ... plus the days are longer so you spend longer away from home so you don't eat so much, but I used to be [ ] stone, but when she weighed me yesterday with my clothes on, she said I was [1.5 stones less]</p> <p>LR: ...you think that's just over the summer or ?</p> <p>P3: I reckon that's over the last two years.</p> <p>LR: Yeah?</p> <p>RES: Yeah. I reckon about the last two years, because I always said [1.5 stone heavier than current weight ] stones is too heavy for me. And then people would say it's a beer gut</p> |
| <b>P28</b> |                                                                               | <p>LB: Have you had any other types of cough that have lasted more than three weeks?</p> <p>P28: No.</p> <p>LB: No. Would you say you had a smokers cough...</p> <p>P28: No I wouldn't actually! Would you? No.</p> <p>P28P: Not really.</p> <p>P28: No, never hacking coughs or anything.</p> <p>P28P: not a dry cough like ( )</p> <p>LB: Sorry you didn't have a dry cough?</p> <p>P28P: No. No. ((pause)) No more than a lot of people have got you know. In the day and you know</p>                                                                                                                                                                                                                                                                                                                                                    |

## APPENDIX 1 (Web Only File)

### Interview topic guide: IPCARD Chest Symptoms Study

- I. +II. **Unstructured and Semi-structured interview:**
- Record patient's health and illness experiences
  - Focussing on the period leading up to their referral for LC Investigation and all experiences of health and illness during the last 2 years, explore:
    - participants' interpretations of and explanations for symptoms
    - Impact of ill health/symptoms
- III. **Structured interview:**
- Explore list of specific symptom presentations and health changes (attached).
- IV. **Further semi-structured interview questions:** Help-seeking behaviour and use of health services (These questions are to follow accounts of symptoms elicited in sections I, II and III):
- What did you do about [symptom/health change]?
    - any health care, treatments, information or advice received
    - reasons for seeking or not seeking medical help.

### Introduction

“Thank you for agreeing to this interview. It should take about 60-90 minutes to complete. If at any time, you wish to stop or have a break, please let me know. If you want any questions repeated or clarified, please ask. I would like to build up a detailed picture of your experiences of health and illness. I am interested in anything that you noticed about your health even if you thought it was minor or not connected to your recent visit to [hospital/clinic]. I will then be asking you to talk in more detail about your experiences of health from when you first noticed a change in your health up to the time when you were referred to the [clinic] and about all aspects of your health in the last 2 years.”

### Section I

The topic guide provides a number of questions which the interviewer might use to initiate discussion about a particular topic. However, the interviewer might revise the questions, or alter their order, in light of the interviewee's response to earlier questions.

#### Part 1: Exploration of health and illness

Purpose: To explore the participant's experiences of health and illness over their lifetime including any symptoms/problems/changes in health that they have noticed in the last 2 years.

- Could you tell me how you came to be in Dr [ ]'s clinic/ came to be seeing Dr X
- Please tell me about your health and any illnesses that you have experienced

- How has your health changed (are there any changes that you noticed)?

## Section II

- When did you first notice something was wrong, or a there had been a change in your health?
- Have you experienced any other changes in your health during the last 2 years?

Prompts: use following prompts to aid recall of dates:

- o What year was this?
- o What month was this?
- o What season was this?
- o What it close to an event in the year, such as Christmas or Easter?
- o Was this at the same time as any other event in your life?
- o Was this at the same time as any family/ social event?
- o What else was going on in your life at the time?
- Has there been anything else that you have visited your doctor about during the last 2 years?
- Has there been anything else at all relating to your health that you have noticed during the last 2 years even if minor?

Probes: for all illnesses explore:

- o Severity
- o Duration
- o Change over time/how/when (use same probes as for Part 1)
- o Impact (social/lifestyle/ family/psychological/ what did the participant think about their symptom)
- o Participant's explanations for illness/associated with?/causes

## Section III

"I have a list of things that some people notice before they are told that they have a chest problem. I am going to ask you if you experienced each of these things. I will then ask you about each health change that you experienced in more detail."

- |                                                                                                    |                                                |
|----------------------------------------------------------------------------------------------------|------------------------------------------------|
| 01. Cough                                                                                          | YES NO (see structured guide - cough)          |
| 02. Coughing up blood                                                                              | YES NO (see structured guide - haemoptysis)    |
| 03. Breathlessness or panic attacks                                                                | YES NO (see structured guide - breathlessness) |
| 04. Changes in eating, appetite, taste or weight                                                   | YES NO (see structured guide – eating/weight)  |
| 05. Pain                                                                                           | YES NO (see structured guide - pain)           |
| 06. Discomfort or strange sensations                                                               | YES NO (see structured guide – discomfort)     |
| 07. Aches or pain in chest, back, shoulders or joints<br>(if not mentioned in response to 5 and 6) | YES NO (see structured guide – specific aches) |
| 08. Skin changes                                                                                   | YES NO (see structured guide – skin)           |
| 09. Lots of infections                                                                             | YES NO (see structured guide - infections)     |

|                                 |                                               |
|---------------------------------|-----------------------------------------------|
| 10. Tiredness                   | YES NO (see structured guide – tiredness)     |
| 11. Feeling generally unwell    | YES NO (see structured guide – unwell)        |
| 12. Hot or cold sweats          | YES NO (see structured guide – sweats)        |
| 13. Voice changes or hoarseness | YES NO (see structured guide – voice changes) |
| 14. Other (DESCRIBE) -----      | YES NO (see generic guide – other)            |

Information: Turn to relevant problems identified by participant. Only sections relating to the problems/changes identified by the should be completed

#### Section IV

**Semi-structured interview: Help-seeking behaviour and use of health services** (These questions follow accounts of symptoms elicited in sections I, II and III, and do not necessarily come at the end of the interview):

- What did you do about the symptom?

##### Prompts

- Confided in close family member/friend– who did you talk to first?/who else did you speak to
  - Found information (Read health related article in magazine or book, Consulted a medical dictionary/encyclopaedia, watched a health related TV/Video, Undertook an internet search),
  - Sought advice (e.g .Sought advice from NHS direct/ walk-in centre, Spoke to practice nurse/other health professional, Spoke to your GP/made appointment to see GP)
  - Treatment (other than GP advised) Took over the counter medication (self-prescribed or pharmacist consulted), Took complementary medicine/ therapy
- Why was that, what was it about your [symptom] that made you do /see X/not seek help?
  - What happened when you did X?
  - Have you done anything further about/received any further medical care /help with [symptom] since X?
    - If further help was sought - what made you seek this help?
  - Please describe any changes in the way you manage or live with the [symptom] since X

Relationship with GP and barriers to use of primary care services

- Have there been any circumstances in which you were unsure about whether to seek help from your GP?



1  
2  
3  
4  
5  
6  
7  
8  
9  
10  
11  
12  
13  
14  
15  
16  
17  
18  
19  
20  
21  
22  
23  
24  
25  
26  
27  
28  
29  
30  
31  
32  
33  
34  
35  
36  
37  
38  
39  
40  
41  
42  
43  
44  
45  
46  
47  
48  
49  
50  
51  
52  
53  
54  
55  
56  
57  
58  
59  
60

- What things have made you decide against visiting your GP/practice nurse?
- Have there been any other circumstances in which attending your GP would have been difficult?
  - What were these?

For peer review only
