# Supplementary material for: Eliciting symptoms interpreted as normal by patients with early-stage lung cancer: could GP elicitation of normalised symptoms reduce delay in diagnosis? Cross-sectional interview study
Source: HighWire-hosted journal article supplement (doi:10.1136/bmjopen-2012-001977), 2012-01-01
Supplement: bmjopen-2012-001977supp2.pdf [file bmjopen-2012-001977supp2.pdf]

## COREQ guidelines table

| Domain 1:<br>Research team<br>and reflexivity |                                          |                                                                                                                                            | Comment                                                                                                                                                             |
|-----------------------------------------------|------------------------------------------|--------------------------------------------------------------------------------------------------------------------------------------------|---------------------------------------------------------------------------------------------------------------------------------------------------------------------|
| Personal<br>Characteristics                   |                                          |                                                                                                                                            |                                                                                                                                                                     |
| 1.                                            | Interviewer/facilitator                  | Which author/s conducted the interview?                                                                                                    | LB                                                                                                                                                                  |
| 2.                                            | Credentials                              | What were the researcher's credentials? <i>E.g. PhD, MD</i>                                                                                | BA PhD                                                                                                                                                              |
| 3.                                            | Occupation                               | What was their occupation at the time of the study?                                                                                        | Research Fellow                                                                                                                                                     |
| 4.                                            | Gender                                   | Was the researcher male or female?                                                                                                         | Female                                                                                                                                                              |
| 5.                                            | Experience and training                  | What experience or training did the researcher have?                                                                                       | >15 years experience of conducting and leading qualitative research.                                                                                                |
| Relationship<br>with<br>participants          |                                          |                                                                                                                                            |                                                                                                                                                                     |
| 6.                                            | Relationship established                 | Was a relationship established prior to study commencement?                                                                                | No – participants were recruited following contact with a clinician                                                                                                 |
| 7.                                            | Participant knowledge of the interviewer | What did the participants know about the researcher? <i>e.g. personal goals, reasons for doing the research</i>                            | Participants were made aware of reasons for doing the research – to better understand their experiences of health and symptoms. And develop a symptom questionnaire |
| 8.                                            | Interviewer characteristics              | What characteristics were reported about the interviewer/facilitator? <i>e.g. Bias, assumptions, reasons and interests in the research</i> | Research interests were reported                                                                                                                                    |

## COREQ guidelines table

|                                   |                                          |                                                                                                                                                                                             |                                                                                                                                                                                              |
|-----------------------------------|------------------------------------------|---------------------------------------------------------------------------------------------------------------------------------------------------------------------------------------------|----------------------------------------------------------------------------------------------------------------------------------------------------------------------------------------------|
|                                   |                                          | <i>topic</i>                                                                                                                                                                                |                                                                                                                                                                                              |
| <b>Domain 2:<br/>study design</b> |                                          |                                                                                                                                                                                             |                                                                                                                                                                                              |
| Theoretical<br>framework          |                                          |                                                                                                                                                                                             |                                                                                                                                                                                              |
| 9.                                | Methodological<br>orientation and Theory | What methodological<br>orientation was stated to<br>underpin the study? <i>e.g.</i><br><i>grounded theory, discourse<br/>analysis, ethnography,<br/>phenomenology, content<br/>analysis</i> | Discourse analysis,<br>thematic analysis and<br>Constant comparative<br>method                                                                                                               |
| Participant<br>selection          |                                          |                                                                                                                                                                                             |                                                                                                                                                                                              |
| 10.                               | Sampling                                 | How were participants<br>selected? <i>e.g. purposive,<br/>convenience, consecutive,<br/>snowball</i>                                                                                        | Two sampling methods<br>were used,<br>consecutive sampling<br>of eligible patients<br>attending surgeons<br>and opportunistic<br>sampling of patients by<br>clinician letter.                |
| 11.                               | Method of approach                       | How were participants<br>approached? <i>e.g. face-to-face,<br/>telephone, mail, email</i>                                                                                                   | Consecutively sampled<br>participants were<br>approached face to<br>face. Participants<br>contacted by letter<br>who expressed<br>interest in the study<br>were then approached<br>by phone. |
| 12.                               | Sample size                              | How many participants were<br>in the study?                                                                                                                                                 | 20                                                                                                                                                                                           |
| 13.                               | Non-participation                        | How many people refused to<br>participate or dropped out?<br>Reasons?                                                                                                                       | 3                                                                                                                                                                                            |
| Setting                           |                                          |                                                                                                                                                                                             |                                                                                                                                                                                              |

## COREQ guidelines table

|                               |                              |                                                                                          |                                                                                                                                                |
|-------------------------------|------------------------------|------------------------------------------------------------------------------------------|------------------------------------------------------------------------------------------------------------------------------------------------|
| 14.                           | Setting of data collection   | Where was the data collected? e.g. <i>home, clinic, workplace</i>                        | Participants own homes (18). Hospital setting (2).                                                                                             |
| 15.                           | Presence of non-participants | Was anyone else present besides the participants and researchers?                        | In 3 cases a partner (2) or carer (1) was present. If a partner was present this is indicated in the excerpts presented.                       |
| 16.                           | Description of sample        | What are the important characteristics of the sample? e.g. <i>demographic data, date</i> | Route to diagnosis (symptomatic, incidental), age, comorbidities.                                                                              |
| Data collection               |                              |                                                                                          |                                                                                                                                                |
| 17.                           | Interview guide              | Were questions, prompts, guides provided by the authors? Was it pilot tested?            | The Interview guide was pilot tested.                                                                                                          |
| 18.                           | Repeat interviews            | Were repeat interviews carried out? If yes, how many?                                    | No                                                                                                                                             |
| 19.                           | Audio/visual recording       | Did the research use audio or visual recording to collect the data?                      | Audio-recording                                                                                                                                |
| 20.                           | Field notes                  | Were field notes made during and/or after the interview or focus group?                  | Field notes were made after the interview.                                                                                                     |
| 21.                           | Duration                     | What was the duration of the interviews or focus group?                                  | 1 - 1.5 hours.                                                                                                                                 |
| 22.                           | Data saturation              | Was data saturation discussed?                                                           | Yes                                                                                                                                            |
| 23.                           | Transcripts returned         | Were transcripts returned to participants for comment and/or correction?                 | No. Participants were awaiting lung resection and clinicians did not want participants to be contacted in the months following this procedure. |
| <b>Domain 3: analysis and</b> |                              |                                                                                          |                                                                                                                                                |

## COREQ guidelines table

|                 |                                |                                                                                                                                          |                                                                                                          |
|-----------------|--------------------------------|------------------------------------------------------------------------------------------------------------------------------------------|----------------------------------------------------------------------------------------------------------|
| <b>findings</b> |                                |                                                                                                                                          |                                                                                                          |
| Data analysis   |                                |                                                                                                                                          |                                                                                                          |
| 24.             | Number of data coders          | How many data coders coded the data?                                                                                                     | 2. LB and GL                                                                                             |
| 25.             | Description of the coding tree | Did authors provide a description of the coding tree?                                                                                    | No but a description of main themes was provided                                                         |
| 26.             | Derivation of themes           | Were themes identified in advance or derived from the data?                                                                              | Identified from the data                                                                                 |
| 27.             | Software                       | What software, if applicable, was used to manage the data?                                                                               | MS Word. Discourse analysis was used, so coded data was kept in context within the interview transcript. |
| 28.             | Participant checking           | Did participants provide feedback on the findings?                                                                                       | No – for the reasons given above regarding the return of transcripts                                     |
| Reporting       |                                |                                                                                                                                          |                                                                                                          |
| 29.             | Quotations presented           | Were participant quotations presented to illustrate the themes / findings? Was each quotation identified? e.g. <i>participant number</i> | Yes                                                                                                      |
| 30.             | Data and findings consistent   | Was there consistency between the data presented and the findings?                                                                       | Yes                                                                                                      |
| 31.             | Clarity of major themes        | Were major themes clearly presented in the findings?                                                                                     | Yes                                                                                                      |
| 32.             | Clarity of minor themes        | Is there a description of diverse cases or discussion of minor themes?                                                                   | Yes – exceptions are discussed                                                                           |
